# Supplementary material
Source: PubMed Central journal article supplement (PMC7093765)
Supplement: jama-323-1161-s001.pdf [file jama-323-1161-s001.pdf]

## Supplementary Online Content

Liu J, Rehm CD, Onopa J, Mozaffarian D. Trends in diet quality among youth in the United States, 1999-2016. *JAMA*. Published March 24, 2020. doi:10.1001/jama.2020.0878

**eAppendix 1.** Methods of Estimating American Heart Association (AHA) Dietary Scores and Healthy Eating Index (HEI)-2015 Scores

**eAppendix 2.** Identification for Participation in Federal Nutrition Assistance Program and Harmonization Across NHANES Cycles

**eTable 1.** Dietary Components of the American Heart Association (AHA) 2020 Strategic Impact Goals Scoring Standards

**eTable 2.** Dietary Components of Healthy Eating Index (HEI)-2015 and Scoring Standards

**eTable 3.** The Disaggregated Dietary Components Modeled in Markov Chain Monte Carlo (MCMC) Method

**eTable 4.** Trends in Estimated Percentage of US Children Aged 2-19 Years Old With Poor or Intermediate Diet Based on Primary and Secondary American Heart Association (AHA) Continuous Diet Score by NHANES Survey Cycles, 1999-2016

**eTable 5.** Sensitivity Analysis of the Healthy Eating Index (HEI)-2015 Total and Component Scores Estimated Using the Population Ratio Methods Among US Children Aged 2-19 Years Old by NHANES Survey Cycles, 1999-2016

**eTable 6.** Sensitivity Analysis of the Healthy Eating Index (HEI)-2015 Total and Component Scores Estimated Using the Markov Chain Monte Carlo (MCMC) Method Among US Children Aged 2-19 Years Old by NHANES Survey Cycles, 2003-2016

**eTable 7.** Trends in Estimated Mean Consumption of Key Food Groups and Nutrients Among US Children Aged 2-19 Years Old by NHANES Survey Cycles, 1999-2016

**eTable 8.** Impact of Adjusting for Demographic Changes in Age, Sex, and Race/Ethnicity on Observed Trends for Selected Dietary Factors Among US Children Aged 2-19 Years Old From 1999 to 2016

**eTable 9.** Trends in Estimated Primary and Secondary American Heart Association (AHA) Diet Scores by Age Group, Sex, Race/Ethnicity, Parental Education, Household Income, Food Security Status, and Participation of Food Assistance Programs by NHANES Survey Cycles, 1999-2016

**eTable 10.** Trends in Estimated Healthy Eating Index (HEI)-2015 by Age Group, Sex, Race/Ethnicity, Parental Education, Household Income, Food Security Status, and Participation of Food Assistance Programs by NHANES Survey Cycles, 1999-2016

**eTable 11.** Trends in Estimated Percentage of US Children with Poor or Intermediate Diet Based on Primary American Heart Association (AHA) Continuous Diet Score by Age Group, Sex, Race/Ethnicity, Parental Education, Household Income, Food Security Status, and Participation of Food Assistance Programs by NHANES Survey Cycles, 1999-2016

**eTable 12.** Trends in Estimated Percentage of US Children With Poor or Intermediate Diet Based on Secondary American Heart Association (AHA) Continuous Diet Score by Age Group, Sex, Race/Ethnicity, Parental Education, Household Income, Food Security Status, and Participation of Food Assistance Programs by NHANES Survey Cycles, 1999-2016

**eTable 13.** Trends in Estimated Mean Consumption of Food Groups and Nutrients of Interest by Age Group Among US Children by NHANES Survey Cycles, 1999-2004, 2005-2010 and 2011-2016

**eTable 14.** Trends in Estimated Mean Consumption of Food Groups and Nutrients of Interest by Sex Among US Children by NHANES Survey Cycles, 1999-2004, 2005-2010 and 2011-2016

**eTable 15.** Trends in Estimated Mean Consumption of Food Groups and Nutrients of Interest by Race/Ethnicity Among US Children by NHANES Survey Cycles, 1999-2004, 2005-2010 and 2011-2016

**eTable 16.** Trends in Estimated Mean Consumption of Food Groups and Nutrients of Interest by Parental Education Levels Among US Children by NHANES Survey Cycles, 1999-2004, 2005-2010 and 2011-2016

**eTable 17.** Trends in Estimated Mean Consumption of Food Groups and Nutrients of Interest by Family Income to Poverty Ratio (PIR) Among US Children by NHANES Survey Cycles, 1999-2004, 2005-2010 and 2011-2016

**eTable 18.** Trends in Estimated Mean Consumption of Food Groups and Nutrients of Interest by Household Food Security Status Among US Children by NHANES Survey Cycles, 1999-2004, 2005-2010 and 2011-2014

**eTable 19.** Trends in Estimated Mean Consumption of Food Groups and Nutrients of Interest by Participation of Supplemental Nutrition Assistance Program (SNAP) Among US Children by NHANES Survey Cycles, 1999-2004, 2005-2010 and 2011-2014

**eTable 20.** Trends in Estimated Mean Consumption of Food Groups and Nutrients of Interest by Participation of Women, Infants, & Children (WIC) Nutrition Program Among US Children by NHANES Survey Cycles, 1999-2004, 2005-2010 and 2011-2014

**eTable 21.** Trends in Estimated Mean Consumption of Food Groups and Nutrients of Interest by Participation of National School Lunch Program (NSLP)/School Breakfast Program (SBP) Among US Children by NHANES Survey Cycles, 1999-2004, 2005-2010 and 2011-2016

**eFigure 1.** Trends in Estimated Mean Consumption of Nuts/Seeds and Legumes (Panel A), Sodium and Potassium (Panel B), and Dietary Fat (Panel C) Among US Children Based on NHANES Data From 1999-2016

**eFigure 2.** Trends in Estimated Mean Consumption of Sugar-Sweetened Beverages (Panel A), Refined Grain (Panel B), White Potato (Panel C), Processed Meat (Panel D), Sodium (Panel E), and Fruit Juice (Panel F) by Age, Sex, and Race/Ethnicity Among US Children Based on NHANES Data From 1999-2016

**eFigure 3.** Trends in Estimated Mean Consumption of Whole Grains (Panel A), Nuts/Seeds (Panel B), Fruits (Panel C), and Seafoods (Panel D) by Age, Sex, and Race/Ethnicity Among US Children Based on NHANES Data From 1999-2016

**eFigure 4.** Trends in Estimated Mean Consumption of Sugar-Sweetened Beverages (Panel A), Refined Grain (Panel B), White Potato (Panel C), Processed Meat (Panel D), Sodium (Panel E), and Fruit Juice (Panel F) by Parental Education Level, Household Income Level, and Household Food Security Level Among US Children Based on NHANES Data From 1999-2016

**eFigure 5.** Trends in Estimated Mean Consumption of Whole Grains (Panel A), Nuts/Seeds (Panel B), Fruits (Panel C), and Seafoods (Panel D) by Parental Education Level, Household Income Level, and Household Food Security Level Among US Children Based on NHANES Data From 1999-2016

**eFigure 6.** Trends in Estimated Mean Consumption of Sugar-Sweetened Beverages (Panel A), Refined Grain (Panel B), White Potato (Panel C), Processed Meat (Panel D), Sodium (Panel E), and Fruit Juice (Panel F) by Participation of Women, Infants, and Children (WIC), Supplemental Nutrition Assistance Program (SNAP), and National School Lunch/Breakfast Program Among US Children Based on NHANES Data From 1999-2016

**eFigure 7.** Trends in Estimated Mean Consumption of Whole Grains (Panel A), Nuts/Seeds (Panel B), Fruits (Panel C), and Seafoods (Panel D) by Participation of Women, Infants, and Children (WIC), Supplemental Nutrition Assistance Program (SNAP), and National School Lunch/Breakfast Program Among US Children Based on NHANES Data From 1999-2016

## **eReferences**

This supplementary material has been provided by the authors to give readers additional information about their work.

## **eAppendix 1. Methods of Estimating American Heart Association (AHA) Dietary Scores and Healthy Eating Index (HEI) 2015 Scores**

### **The American Heart Association (AHA) Diet Scores**

To assess a summary diet score, we constructed a continuous diet score based on the AHA 2020 Strategic Impact Goal dietary targets, which have been significantly associated with cardiovascular and metabolic outcomes in multiple analyses.<sup>1</sup> The primary dietary targets are fruits/vegetables, whole grains, fish and shellfish, sodium, sugar-sweetened beverages and sodium; and the secondary targets: nuts/legumes/seeds, processed meat, and saturated fat (**eTable 1**). To best assess changes, we constructed a continuous score. Intake of each dietary item was scored from 0-10 or 10-0 depending on whether consumption was encouraged or discouraged, respectively. All dietary variables were energy-adjusted to 2000 kcal/d using the residual method prior to analysis. Optimal intake (i.e., at or greater than the target AHA level for encouraged foods/nutrients; or at or less than the target AHA level for discouraged foods/nutrients) was assigned a score of 10, and intermediate intake was scored linearly between 0 and 10. The scoring ranges were provided in **eTable 1**. The sum of the dietary components was used to create two scores, a primary score (5 primary dietary targets) ranging from 0 to 50; and the secondary score (5 primary and 3 secondary dietary targets) ranging from 0 to 80. Based on AHA 2020 targets, the proportion of US children with poor (<40% of optimal score), intermediate (40-79.9% of optimal score) or ideal ( $\geq$ 80% of optimal score) dietary quality were evaluated. Details regarding the AHA score was published elsewhere.<sup>2</sup>

### **The Healthy Eating Index (HEI) 2015**

The HEI is a measure of diet quality, independent of quantity, that can be used to assess compliance with the US Dietary Guidelines for Americans (DGAs) and monitor changes in dietary patterns. The original HEI was released by the US Department of Agriculture's (USDA) Center for Nutrition Policy and Promotion in 1995 and since then it has been periodically updated through a collaboration with the USDA and National Cancer Institute (NCI).<sup>3</sup> The HEI-2015 is the latest iteration of the index and was designed to align with key dietary recommendations from the *2015-2020 DAGs*. The HEI-2015 contains 13 components that sum to a total maximum score of 100 points (**eTable 2**). Each of the components is scored on a density basis out of 1,000 calories, with the exception of Fatty Acids, which is a ratio of unsaturated to saturated fatty acid. Currently, several methods associated with SAS macros that have been developed for use with the HEI are available to the public, and details can be found on the NCI website: <https://epi.grants.cancer.gov/hei/hei-scores-for-describing-dietary-intake.html>.

#### ***Simple HEI Scoring Algorithm***

The simple HEI scoring algorithm method is applied to calculate scores using computed amounts of each component in the HEI.<sup>4</sup> To use the simple HEI scoring method, first the ratio of the dietary constituents to energy is constructed and scored according to the scoring standards. The component scores are summed to calculate the total score. The mean total score is the mean of the total scores across individuals. When more than one 24HR recall per person is available, the score is calculated by summing across all days per person before scoring.

#### ***Population Ratio Method***

The population ratio method is used to calculate the mean intakes of dietary constituents and scoring standards are applied to arrive at scores at the level of a group of persons.<sup>5</sup> To apply the population ratio method, the intake of the relevant dietary constituents and energy are summed for all individuals in a population to obtain estimates of the population's total intake, and then the ratios of each constituent to energy are computed and scored. The total score is then the sum of the component scores. While this method does not estimate usual intake at the *individual* level, it may be used to estimate usual intake at the *population* level.

### ***The MCMC Method on Estimating the distribution of the HEI scores***

Markov chain Monte Carlo (MCMC) is a statistical method that is used when modeling complex distributions such as the modeling of the HEI score, which requires simultaneous estimation of the 21 latent variables (2 for each of the 6 episodically consumed constituents, 1 for probability of consumption and 1 for consumption day amount; 1 for each of the 8 daily consumed dietary constituents; and 1 energy).<sup>6,7</sup> It works by simulating the random variables 5000 times to estimate the distributions and uses an algorithm to ensure the correct distribution is estimated. In order to run the MCMC method, at least 2 24-hour recalls on a subset of participants are required to fit the MCMC model. Furthermore, a dietary component cannot be contained within another dietary component (e.g., whole fruit as part of total fruit). Therefore, the components fit in the MCMC macro are not each of the individual HEI components; instead the disaggregated component for each composite dietary variable. The details of dietary variables corresponding to each of HEI-2015 components were presented (**eTable 3**).

When running the MCMC method, it was suggested at least 50 people with 2 non-zero recalls for each of the dietary component per stratum. The *explore* macro provided the number of non-zero recalls by stratum.

## **eAppendix 2. Identification for Participation in Federal Nutrition Assistance Program and Harmonization Across NHANES Cycles**

### **Household WIC participation**

Participation in the Special Supplemental Nutrition Program for Women, Infant, and Children (WIC) in this study was assessed at the level of the household using household interview. The household-level question was asked differently across cycles. For the NHANES 1999-2000 “*In the last 12 months, did {you/you or any member of your household} receive benefits from the WIC program, that is, the Women, Infants and Children program?*” Household WIC participation was defined by a binary variable, with “no” responses to that question classified as household WIC non-participants, whereas “yes” to that question classified household WIC participants.

### **Household SNAP participation**

Participation in Supplemental Nutrition Assistance Program (SNAP) in this study was assessed at the level of the household using a household interview. The available household-level question was asked differently across cycles. For the NHANES 1999-2000 and NHANES 2001-2002, the question was asked “*[In the last 12 months], how many people in your household were authorized to receive Food Stamps?*”. For the NHANES 2003-2004 and NHANES 2005-2006, the question was asked “*[In the last 12 months], were {you/you or any members of your household} authorized to receive Food Stamps [which includes a food stamp card or voucher, or cash grants from the state for food]?*”. For the NHANES 2007-2008, NHANES 2009-2010 and NHANES 2011-2012, the question was asked “*In the last 12 months, did {you/you or any member of your household} receive Food Stamp benefits?*” Household SNAP participation was defined by a binary variable, with positive numbers of people in household authorized for food stamps or “yes” responses to that question classified as household SNAP participants and otherwise classified as household SNAP nonparticipants.

### **NSLP/SBP participation**

Household National School Lunch Program (NSLP) or School Breakfast Program (SBP) participant was defined with “Free” or “Reduced price” responses to the question “*{Do you/Does SP} get these lunches free, at a reduced price, or {do you/does he/she} pay full price?*” or “*{Do you/Does SP} get these breakfasts free, at a reduced price, or {do you/does he/she} pay full price?*”

**eTable 1. Dietary Components of the American Heart Association (AHA) 2020 Strategic Impact Goals Scoring Standards**

| AHA Components                          | Points Range | Scoring Standard <sup>a</sup> |                          |
|-----------------------------------------|--------------|-------------------------------|--------------------------|
|                                         |              | Max                           | Min                      |
| <b>Primary Components<sup>b</sup></b>   | 0-50         |                               |                          |
| Fruits and vegetables <sup>c</sup>      | 0-10         | ≥4.5 cups equiv. per day      | 0                        |
| Fish and shellfish                      | 0-10         | ≥1 oz equiv. per day          | 0                        |
| Whole grains                            | 0-10         | ≥3 oz equiv. per day          | 0                        |
| Sugar-sweetened beverages               | 10-0         | ≤ 5.14 fl oz per day          | >16 fl per day           |
| Sodium                                  | 10-0         | ≤ 1500 mg per day             | >4500 mg per day         |
| <b>Secondary Components<sup>b</sup></b> | 0-80         |                               |                          |
| Nuts, seeds and legumes <sup>d</sup>    | 0-10         | ≥4 servings per day           | 0                        |
| Processed meat                          | 10-0         | ≤ 0.5 oz equiv. per day       | >1.764 oz equiv. per day |
| Saturated fat                           | 10-0         | ≤7% energy                    | >15% energy              |

<sup>a</sup> Intakes between the minimum and maximum standards are scored proportionately.

<sup>b</sup> All AHA dietary variables were energy-adjusted to 2000kcal/d using the residual method prior to analysis.

<sup>c</sup> According to the AHA 2020 Goals, up to 3 cups/wk (0.42 cups/d) of starchy vegetables (e.g., potatoes, peas, corn) could be included; this maximum was incorporated into the analysis, with higher intake not contributing toward the score. 100% fruit juice could also be included; while its contribution was not capped in the original AHA 2020 Goals and thus not in our score, some organizations recommend no more than 1 serving/d of 100% fruit juice.

<sup>d</sup> A serving of nuts, seeds and legumes is 1-oz equivalent of nuts and seeds or ½ cup of legume.

**eTable 2. Dietary Components of Healthy Eating Index (HEI)-2015 and Scoring Standards**

| HEI-2015 Components                        | Points Range | Scoring Standard <sup>a</sup>  |                               |
|--------------------------------------------|--------------|--------------------------------|-------------------------------|
|                                            |              | Maximum                        | Minimum                       |
| <b>Adequacy Components</b>                 |              |                                |                               |
| Total Fruits <sup>b</sup>                  | 0-5          | ≥0.8 cup equiv. per 1,000 kcal | 0                             |
| Whole Fruits <sup>c</sup>                  | 0-5          | ≥0.4 cup equiv. per 1,000 kcal | 0                             |
| Total Vegetables <sup>d</sup>              | 0-5          | ≥1.1 cup equiv. per 1,000 kcal | 0                             |
| Greens and Beans <sup>d</sup>              | 0-5          | ≥0.2 cup equiv. per 1,000 kcal | 0                             |
| Whole Grains                               | 0-10         | ≥1.5 oz equiv. per 1,000 kcal  | 0                             |
| Dairy <sup>e</sup>                         | 0-10         | ≥1.3 cup equiv. per 1,000 kcal | 0                             |
| Total Protein Foods <sup>f</sup>           | 0-5          | ≥2.5 oz equiv. per 1,000 kcal  | 0                             |
| Seafood and Plant Proteins <sup>e, g</sup> | 0-5          | ≥0.8 oz equiv. per 1,000 kcal  | 0                             |
| Fatty Acids <sup>h</sup>                   | 0-10         | (PUFAs + MUFAs)/SFAs ≥2.5      | (PUFAs + MUFAs)/SFAs ≤1.2     |
| <b>HEI-2015 Moderation</b>                 |              |                                |                               |
| Refined Grains                             | 10-0         | ≤1.8 oz equiv. per 1,000 kcal  | ≥4.3 oz equiv. per 1,000 kcal |
| Sodium                                     | 10-0         | ≤1.1 grams per 1,000 kcal      | ≥2.0 grams per 1,000 kcal     |
| Added Sugars                               | 10-0         | ≤6.5% of energy                | ≥26% of energy                |
| Saturated Fats                             | 10-0         | ≤8% of energy                  | ≥16% of energy                |

<sup>a</sup> Intakes between the minimum and maximum standards are scored proportionately.

<sup>b</sup> Includes 100% fruit juice.

<sup>c</sup> Includes all forms except juice.

<sup>d</sup> Includes legumes (beans and peas)

<sup>e</sup> Includes all milk products, such as fluid milk, yogurt, and cheese, and fortified soy beverages.

<sup>f</sup> Includes legumes (beans and peas)

<sup>g</sup> Includes seafood, nuts, seeds, soy products (other than beverages), and legumes (beans and peas).

<sup>h</sup> Ratios of poly- and monounsaturated fatty acids (PUFAs and MUFAs) to saturated fatty acids (SFAs).

**eTable 3. The Disaggregated Dietary Components Modeled in Markov Chain Monte Carlo (MCMC) Method**

| HEI-2015 Components        | MCMC variables (unit)                     | Type     |
|----------------------------|-------------------------------------------|----------|
| Total Fruits               | Whole fruit (cup eq.)                     | Episodic |
|                            | Fruit juice (cup eq.)                     | Episodic |
| Whole Fruits               | Whole fruit (cup eq.)                     | Episodic |
| Total vegetables           | Non-dark green vegetables (cup eq.)       | Daily    |
|                            | Dark green vegetables (cup eq.)           | Episodic |
|                            | Legumes (cup eq.)                         | Episodic |
| Green and beans            | Dark green vegetables (cup eq.)           | Episodic |
|                            | Legumes (cup eq.)                         | Episodic |
| Whole grains               | Whole grains (oz. eq.)                    | Episodic |
| Refined grains             | Refined grains (oz. eq.)                  | Episodic |
| Dairy                      | Dairy (cup eq.)                           | Daily    |
| Total protein foods        | Meat, poultry and eggs (oz. eq.)          | Daily    |
|                            | Seafood, soy and nuts and seeds (oz. eq.) | Episodic |
|                            | Legumes (oz. eq.)                         | Episodic |
| Seafood and plant proteins | Seafood, soy and nuts and seeds (oz. eq.) | Episodic |
|                            | Legumes (oz. eq.)                         | Episodic |
| Added sugars <sup>a</sup>  | Added sugars (tsp. eq.)                   | Daily    |
| Fatty acids <sup>a,b</sup> | Fatty acids (g)                           | Daily    |
| Saturated fats             | Saturated fats (g)                        | Daily    |
| Sodium                     | Sodium (mg)                               | Daily    |
|                            | Energy (kcal)                             | Daily    |

Abbreviations: cup eq.: cup equivalents; oz. eq.: ounce equivalents; tsp. eq.: teaspoon equivalents; g: grams; mg: milligrams.

<sup>a</sup> converted to energy in the scoring system. For added sugars, 1 tsp =4.2 grams

<sup>b</sup> refers to the sum of total monounsaturated fatty acids and total polyunsaturated fatty acids.



**eTable 4. Trends in Estimated Percentage of US Children Aged 2-19 Years Old With Poor or Intermediate Diet Based on Primary and Secondary American Heart Association (AHA) Continuous Diet Score by NHANES Survey Cycles, 1999-2016**

| AHA Score Components       | Survey-Weighted % (95% CI) <sup>a</sup> |                     |                      |                     |                     |                     |                     |                     |                     | P for trend |
|----------------------------|-----------------------------------------|---------------------|----------------------|---------------------|---------------------|---------------------|---------------------|---------------------|---------------------|-------------|
|                            | 1999-2000                               | 2001-2002           | 2003-2004            | 2005-2006           | 2007-2008           | 2009-2010           | 2011-2012           | 2013-2014           | 2015-2016           |             |
| <b>AHA Primary Score</b>   |                                         |                     |                      |                     |                     |                     |                     |                     |                     |             |
| Poor Diet                  | 76.8<br>(72.9-80.2)                     | 74.5<br>(71.6-77.1) | 72.4<br>(68.1-76.3)  | 67.2<br>(61.1-72.8) | 68.1<br>(64.6-71.4) | 63.7<br>(60.8-66.6) | 59.1<br>(55.3-62.8) | 55.9<br>(52.8-59.0) | 56.1<br>(51.4-60.7) | <.001       |
| Intermediate Diet          | 23.2<br>(19.8-26.9)                     | 25.4<br>(22.8-28.1) | 27.4<br>(23.6-31.6)  | 32.7<br>(27.1-38.8) | 31.7<br>(28.5-35.1) | 36.1<br>(33.3-39.0) | 40.4<br>(36.6-44.3) | 43.6<br>(40.4-46.9) | 43.7<br>(39.1-48.3) | <.001       |
| Ideal Diet                 | 0.07<br>(0.01-0.49)                     | 0.15<br>(0.03-0.72) | 0.19<br>(0.04, 0.95) | 0.08<br>(0.02-0.30) | 0.20<br>(0.06-0.69) | 0.16<br>(0.06-0.44) | 0.49<br>(0.28-0.87) | 0.43<br>(0.16-1.15) | 0.25<br>(0.10-0.62) | .03         |
| <b>AHA Secondary Score</b> |                                         |                     |                      |                     |                     |                     |                     |                     |                     |             |
| Poor Diet                  | 61.0<br>(56.5-65.2)                     | 57.7<br>(54.7-60.7) | 58.2<br>(54.5-61.9)  | 53.3<br>(48.8-57.8) | 53.8<br>(49.3-58.3) | 48.2<br>(45.6-50.8) | 48.3<br>(45.0-51.6) | 46.6<br>(43.3-49.9) | 49.1<br>(45.0-53.3) | <.001       |
| Intermediate Diet          | 39.0<br>(34.7-43.4)                     | 42.0<br>(39.1-45.1) | 41.5<br>(38.0-45.0)  | 46.6<br>(42.1-51.1) | 45.9<br>(41.4-50.4) | 51.4<br>(48.7-54.0) | 51.5<br>(48.2-54.8) | 52.9<br>(49.5-56.1) | 50.4<br>(46.3-54.4) | <.001       |
| Ideal Diet                 | 0.04<br>(0-0.27)                        | 0.21<br>(0.07-0.66) | 0.29<br>(0.08-1.05)  | 0.08<br>(0.02-0.30) | 0.26<br>(0.09-0.75) | 0.40<br>(0.16-0.98) | 0.21<br>(0.06-0.73) | 0.54<br>(0.32-0.93) | 0.50<br>(0.13-1.83) | .03         |

Abbreviation: NHANES, National Health and Nutrition Examination Survey.

<sup>a</sup> Data were weighted to be nationally representative.

P for trend was estimated by treating survey-cycle as a continuous variable in a survey-weighted logistic regression model.

**eTable 5. Sensitivity Analysis of the Healthy Eating Index (HEI)-2015 Total and Component Scores Estimated Using the Population Ratio Methods<sup>a</sup> Among US Children Aged 2-19 Years Old by NHANES Survey Cycles, 1999-2016<sup>a</sup>**

| HEI-2015                         | Survey-Weighted Mean (95% CI) |                            |                            |                            |                            |                            |                            |                            |                            |
|----------------------------------|-------------------------------|----------------------------|----------------------------|----------------------------|----------------------------|----------------------------|----------------------------|----------------------------|----------------------------|
|                                  | 1999-2000                     | 2001-2002                  | 2003-2004                  | 2005-2006                  | 2007-2008                  | 2009-2010                  | 2011-2012                  | 2013-2014                  | 2015-2016                  |
| <b>Total score (0-100)</b>       | <b>48.5</b><br>(46.2-50.7)    | <b>50.7</b><br>(49.2-52.1) | <b>51.1</b><br>(49.4-52.9) | <b>49.8</b><br>(48.7-50.9) | <b>52.2</b><br>(50.0-54.4) | <b>54.0</b><br>(52.5-55.6) | <b>55.0</b><br>(53.5-56.4) | <b>54.6</b><br>(53.2-55.9) | <b>53.2</b><br>(51.2-55.1) |
| <b>Adequacy components</b>       |                               |                            |                            |                            |                            |                            |                            |                            |                            |
| Total fruits (0-5)               | 3.07<br>(2.80-3.34)           | 3.19<br>(2.94-3.43)        | 3.14<br>(2.85-3.43)        | 3.20<br>(2.99-3.42)        | 3.55<br>(3.13-3.97)        | 3.65<br>(3.32-3.99)        | 3.58<br>(3.19-3.98)        | 3.36<br>(3.10-3.62)        | 3.22<br>(2.95-3.49)        |
| Whole fruits (0-5)               | 4.55<br>(4.01-5.10)           | 4.40<br>(3.99-4.82)        | 3.94<br>(3.56-4.31)        | 3.31<br>(3.01-3.61)        | 4.35<br>(3.65-5.06)        | 4.53<br>(4.07-5.00)        | 4.36<br>(3.83-4.90)        | 4.31<br>(3.96-4.66)        | 4.26<br>(3.75-4.77)        |
| Total vegetables (0-5)           | 2.48<br>(2.28-2.69)           | 2.40<br>(2.30-2.49)        | 2.47<br>(2.35-2.58)        | 2.34<br>(2.24-2.43)        | 2.35<br>(2.17-2.52)        | 2.30<br>(2.19-2.41)        | 2.30<br>(2.15-2.44)        | 2.37<br>(2.24-2.51)        | 2.34<br>(2.22-2.47)        |
| Greens and beans (0-5)           | 1.34<br>(1.04-1.65)           | 1.18<br>(1.00-1.37)        | 1.28<br>(1.06-1.50)        | 1.31<br>(1.07-1.54)        | 1.49<br>(1.06, 1.93)       | 1.45<br>(1.17-1.74)        | 1.60<br>(1.32-1.89)        | 1.86<br>(1.56-2.16)        | 1.67<br>(1.44-1.89)        |
| Whole grains (0-10)              | 1.47<br>(1.27-1.68)           | 1.78<br>(1.65-1.91)        | 1.45<br>(1.31-1.59)        | 1.60<br>(1.36-1.83)        | 1.81<br>(1.58-2.05)        | 2.16<br>(2.03-2.30)        | 2.46<br>(2.26-2.67)        | 2.92<br>(2.59-3.25)        | 3.09<br>(2.82-3.35)        |
| Total dairy (0-10)               | 7.53<br>(7.13-7.93)           | 8.14<br>(7.76-8.51)        | 8.30<br>(7.79-8.81)        | 8.14<br>(7.84-8.44)        | 8.21<br>(7.90-8.52)        | 8.95<br>(8.53-9.37)        | 8.78<br>(8.30-9.25)        | 8.55<br>(8.13-8.98)        | 7.97<br>(7.36-8.58)        |
| Total protein foods (0-5)        | 4.20<br>(4.01-4.39)           | 4.20<br>(4.03-4.36)        | 4.30<br>(4.11-4.50)        | 4.42<br>(4.25-4.59)        | 4.65<br>(4.43-4.88)        | 4.70<br>(4.41-4.99)        | 4.61<br>(4.40-4.82)        | 4.82<br>(4.55-5.10)        | 4.72<br>(4.52-4.93)        |
| Seafood and plant proteins (0-5) | 2.57<br>(2.14-3.01)           | 2.57<br>(2.27-2.87)        | 2.84<br>(2.47-3.21)        | 2.65<br>(2.25-3.06)        | 2.65<br>(2.27-3.02)        | 2.96<br>(2.47-3.45)        | 3.13<br>(2.73-3.53)        | 3.10<br>(2.65-3.56)        | 3.22<br>(2.88-3.57)        |
| (PUFAs + MUFAs)/SFAs (0-10)      | 3.04<br>(2.74-3.33)           | 3.18<br>(2.99-3.37)        | 3.22<br>(2.93-3.51)        | 3.03<br>(2.80-3.27)        | 3.05<br>(2.82-3.29)        | 3.20<br>(2.97-3.43)        | 3.49<br>(3.04-3.94)        | 3.03<br>(2.54-3.52)        | 2.96<br>(2.69-3.22)        |
| <b>Moderation components</b>     |                               |                            |                            |                            |                            |                            |                            |                            |                            |
| Refined grains (10-0)            | 4.69<br>(4.22-5.17)           | 4.66<br>(4.29-5.04)        | 4.83<br>(4.50-5.17)        | 4.85<br>(4.47-5.23)        | 5.02<br>(4.61, 5.43)       | 4.65<br>(4.22-5.08)        | 4.91<br>(4.53-5.29)        | 4.72<br>(4.38-5.05)        | 4.61<br>(4.21-5.01)        |
| Sodium (10-0)                    | 5.00<br>(4.65-5.36)           | 5.60<br>(5.39-5.77)        | 5.52<br>(5.25-5.78)        | 5.08<br>(4.69-5.48)        | 4.80<br>(4.35-5.26)        | 4.43<br>(4.08-4.77)        | 4.65<br>(4.30-5.00)        | 4.34<br>(3.97-4.71)        | 4.30<br>(4.09-4.52)        |
| Added sugars (10-0)              | 3.00<br>(2.40-3.59)           | 3.67<br>(3.40-3.95)        | 4.45<br>(4.02-4.88)        | 4.71<br>(4.35-5.07)        | 4.92<br>(4.64-5.20)        | 5.22<br>(4.79-5.64)        | 5.47<br>(5.24-5.71)        | 5.94<br>(5.64-6.24)        | 6.29<br>(6.03-6.55)        |
| Saturated fats (10-0)            | 5.52<br>(5.10-5.95)           | 5.72<br>(5.49-5.96)        | 5.43<br>(5.10-5.76)        | 5.17<br>(4.98-5.36)        | 5.30<br>(4.99-5.61)        | 5.83<br>(5.58-6.08)        | 5.62<br>(5.32-5.91)        | 5.24<br>(4.87-5.62)        | 4.52<br>(4.14-4.90)        |

Abbreviation: NHANES, National Health and Nutrition Examination Survey; MUFAs, monounsaturated fatty acids; PUFAs, polyunsaturated fatty acids; SFAs, saturated fatty acids.

<sup>a</sup> Data were weighted to be nationally representative. The details about the population ratio method were provided in eAppendix 2.

**eTable 6. Sensitivity Analysis of the Healthy Eating Index (HEI)-2015 Total and Component Scores Estimated Using the Markov Chain Monte Carlo (MCMC) Method Among US Children Aged 2-19 Years Old by NHANES Survey Cycles, 2003-2016<sup>a</sup>**

| HEI-2015                         | Survey-Weighted Mean (95% CI) |                         |                         |                         |                         |                         |                         |
|----------------------------------|-------------------------------|-------------------------|-------------------------|-------------------------|-------------------------|-------------------------|-------------------------|
|                                  | 2003-2004                     | 2005-2006               | 2007-2008               | 2009-2010               | 2011-2012               | 2013-2014               | 2015-2016               |
| <b>Total score (0-100)</b>       | <b>51.1 (48.6-53.5)</b>       | <b>49.7 (48.3-51.0)</b> | <b>51.0 (49.3-53.7)</b> | <b>52.3 (50.6-53.9)</b> | <b>51.9 (46.8-57.0)</b> | <b>52.7 (51.3-54.2)</b> | <b>52.3 (50.7-53.8)</b> |
| <b>Adequacy components</b>       |                               |                         |                         |                         |                         |                         |                         |
| Total fruits (0-5)               | 3.61 (2.42-4.80)              | 3.06 (2.83-3.30)        | 3.34 (3.03-3.66)        | 3.37 (3.17-3.57)        | 2.56 (1.42-3.71)        | 3.16 (2.90-3.43)        | 3.17 (2.90-3.45)        |
| Whole fruits (0-5)               | 3.84 (3.53-4.14)              | 3.07 (2.86-3.29)        | 3.48 (3.20-3.76)        | 3.55 (3.29-3.82)        | 2.88 (2.30-3.47)        | 3.46 (3.18-3.74)        | 3.54 (3.26-3.81)        |
| Total vegetables (0-5)           | 2.57 (2.10-3.03)              | 2.47 (2.22-2.72)        | 2.39 (2.23-2.54)        | 2.33 (2.16-2.50)        | 2.66 (0.98-4.33)        | 2.38 (2.20-2.56)        | 2.42 (2.24-2.59)        |
| Greens and beans (0-5)           | 1.43 (0.58-2.28)              | 1.64 (1.05-2.24)        | 1.49 (1.15-1.83)        | 1.55 (1.14-1.96)        | 2.19 (0-4.62))          | 1.90 (1.50-2.31)        | 1.72 (1.28-2.16)        |
| Whole grains (0-10)              | 1.42 (1.22-1.62)              | 1.66 (1.42-1.90)        | 1.93 (1.69-2.17)        | 2.37 (2.25-2.49)        | 2.40 (1.84-2.94)        | 3.02 (2.63-3.41)        | 3.29 (2.98-3.60)        |
| Total dairy (0-10)               | 7.53 (7.12-7.95)              | 7.59 (7.38-7.79)        | 7.76 (7.50-8.02)        | 8.25 (7.91-8.59)        | 7.53 (6.65-8.42)        | 7.93 (7.69-8.16)        | 7.61 (7.26-7.97)        |
| Total protein foods (0-5)        | 4.26 (4.09-4.43)              | 4.20 (4.03-4.36)        | 4.26 (4.16-4.35)        | 4.27 (4.11-4.42)        | 4.63 (4.38-4.88)        | 4.34 (4.21-4.48)        | 4.32 (4.16-4.49)        |
| Seafood and plant proteins (0-5) | 2.93 (2.41-3.45)              | 2.70 (2.28-3.12)        | 2.55 (2.37-2.72)        | 2.76 (2.31-3.20)        | 3.34 (2.20-4.49)        | 2.88 (2.55-3.21)        | 2.93 (2.63-3.22))       |
| (PUFAs + MUFAs)/SFAs (0-10)      | 3.43 (3.20-3.67)              | 3.21 (2.97-3.45)        | 3.17 (2.97-3.37)        | 3.33 (3.08-3.58)        | 4.08 (2.17-5.60)        | 3.20 (2.83-3.57)        | 3.21 (3.04-3.39)        |
| <b>Moderation components</b>     |                               |                         |                         |                         |                         |                         |                         |
| Refined grains (10-0)            | 4.73 (4.38-5.08)              | 4.81 (4.48-5.15)        | 5.21 (4.82-5.60)        | 4.78 (4.44-5.13)        | 4.82 (4.21-5.43)        | 4.71 (4.40-5.02)        | 4.64 (4.23-5.06)        |
| Sodium (10-0)                    | 5.43 (4.96-5.89)              | 5.11 (4.75-5.47)        | 5.07 (4.70-5.44)        | 4.57 (4.28-4.86)        | 4.03 (2.31-5.76)        | 4.42 (4.11-4.73)        | 4.38 (4.12-4.64)        |
| Added sugars (10-0)              | 4.42 (3.92-4.92)              | 4.88 (4.57-5.20)        | 5.12 (4.86-5.39)        | 5.45 (5.15-5.76)        | 4.99 (4.50-5.48)        | 5.99 (5.69-6.29)        | 6.46 (6.23-6.68)        |
| Saturated fats (10-0)            | 5.44 (4.86-6.03)              | 5.23 (5.03-5.43)        | 5.25 (5.01-5.50)        | 5.67 (4.38-5.97)        | 5.76 (3.60-7.92)        | 5.31 (5.04-5.58)        | 4.56 (4.34-4.78)        |

Abbreviation: NHANES, National Health and Nutrition Examination Survey; MUFAs, monounsaturated fatty acids; PUFAs, polyunsaturated fatty acids; SFAs, saturated fatty acids.

<sup>a</sup> Data were weighted to be nationally representative. The MCMC method is used for estimating usual intake and requires two or more recalls per person (on at least a subset of individuals), a method that distinguish day-to-day variation from variation between individuals (“usual intake methods”). The details about the MCMC method were provided in eAppendix 2.

**eTable 7. Trends in Estimated Mean Consumption of Key Food Groups and Nutrients Among US Children Aged 2-19 Years Old by NHANES Survey Cycles, 1999-2016<sup>a</sup>**

| Foods/nutrients                          | Survey-Weighted Mean (95% CI) |                       |                       |                       |                       |                       |                       |                       |                       | P for trend | Difference, 2015-2016 vs 1999-2000 |                            |
|------------------------------------------|-------------------------------|-----------------------|-----------------------|-----------------------|-----------------------|-----------------------|-----------------------|-----------------------|-----------------------|-------------|------------------------------------|----------------------------|
|                                          | 1999-2000<br>(n=3833)         | 2001-2002<br>(n=4288) | 2003-2004<br>(n=3825) | 2005-2006<br>(n=4029) | 2007-2008<br>(n=3109) | 2009-2010<br>(n=3280) | 2011-2012<br>(n=3132) | 2013-2014<br>(n=3019) | 2015-2016<br>(n=2901) |             | Mean change<br>(95% CI)            | Percent change<br>(95% CI) |
| Total fruits, servings/d                 | 1.01<br>(0.93-1.09)           | 1.05<br>(0.96-1.14)   | 1.07<br>(0.97-1.17)   | 1.09<br>(1.03-1.16)   | 1.11<br>(1.01-1.21)   | 1.16<br>(1.05-1.26)   | 1.19<br>(1.10-1.28)   | 1.08<br>(1.00-1.17)   | 1.04<br>(0.96-1.13)   | .12         | 0.03<br>(-0.08, 0.15)              | 3.40<br>(-7.99, 14.8)      |
| Intact/whole fruit                       | 0.46<br>(0.41-0.51)           | 0.48<br>(0.43-0.53)   | 0.48<br>(0.42-0.55)   | 0.58<br>(0.53-0.63)   | 0.67<br>(0.60-0.75)   | 0.71<br>(0.62-0.80)   | 0.73<br>(0.66-0.81)   | 0.68<br>(0.62-0.74)   | 0.68<br>(0.59-0.76)   | <.001       | 0.22<br>(0.12, 0.32)               | 0.46<br>(0.41-0.51)        |
| 100% fruit juice                         | 0.63<br>(0.56-0.70)           | 0.65<br>(0.59-0.70)   | 0.64<br>(0.59-0.70)   | 0.60<br>(0.54-0.66)   | 0.54<br>(0.49-0.60)   | 0.55<br>(0.49-0.61)   | 0.52<br>(0.47-0.56)   | 0.51<br>(0.45-0.58)   | 0.46<br>(0.39-0.53)   | <.001       | -0.17<br>(-0.27, -0.07)            | -27.6<br>(-41.4, -13.9)    |
| Total vegetables, servings/d             | 1.02<br>(0.95-1.09)           | 1.00<br>(0.96-1.04)   | 1.08<br>(1.03-1.13)   | 0.99<br>(0.95-1.03)   | 0.97<br>(0.91-1.02)   | 0.98<br>(0.93-1.03)   | 0.95<br>(0.91-0.99)   | 0.98<br>(0.93-1.02)   | 0.98<br>(0.94-1.02)   | .02         | -0.04<br>(-0.12, 0.04)             | -4.06<br>(-11.8, 3.70)     |
| Dark-green vegetables                    | 0.04<br>(0.03-0.05)           | 0.04<br>(0.03-0.05)   | 0.04<br>(0.03-0.04)   | 0.05<br>(0.04-0.05)   | 0.05<br>(0.04-0.06)   | 0.05<br>(0.04-0.06)   | 0.06<br>(0.05-0.07)   | 0.07<br>(0.06-0.09)   | 0.06<br>(0.04-0.07)   | <.001       | 0.02<br>(0, 0.04)                  | 47.1<br>(-9.70, 104)       |
| Tomatoes                                 | 0.24<br>(0.22-0.25)           | 0.27<br>(0.25-0.29)   | 0.30<br>(0.28-0.32)   | 0.24<br>(0.23-0.26)   | 0.22<br>(0.20-0.25)   | 0.23<br>(0.21-0.25)   | 0.23<br>(0.21-0.24)   | 0.22<br>(0.21-0.23)   | 0.21<br>(0.20-0.23)   | <.001       | -0.02<br>(-0.05, -0.003)           | -10.4<br>(-19.0, -1.75)    |
| Other red/orange vegetables              | 0.06<br>(0.04-0.07)           | 0.05<br>(0.04-0.06)   | 0.04<br>(0.03-0.05)   | 0.05<br>(0.05-0.06)   | 0.05<br>(0.04-0.06)   | 0.05<br>(0.05-0.06)   | 0.05<br>(0.05-0.06)   | 0.06<br>(0.05-0.08)   | 0.07<br>(0.06-0.08)   | .03         | 0.01<br>(-0.01, 0.03)              | 17.9<br>(-23.8, 59.5)      |
| White potatoes                           | 0.35<br>(0.32-0.39)           | 0.32<br>(0.31-0.34)   | 0.35<br>(0.31-0.39)   | 0.30<br>(0.27-0.34)   | 0.31<br>(0.28-0.34)   | 0.29<br>(0.27-0.31)   | 0.28<br>(0.25-0.30)   | 0.27<br>(0.25-0.29)   | 0.32<br>(0.29-0.34)   | <.001       | -0.04<br>(-0.08, 0.008)            | -10.8<br>(-22.7, 1.22)     |
| Other starchy (e.g., corn)               | 0.06<br>(0.05-0.08)           | 0.06<br>(0.05-0.07)   | 0.06<br>(0.06-0.07)   | 0.07<br>(0.06-0.07)   | 0.06<br>(0.05-0.07)   | 0.06<br>(0.05-0.07)   | 0.06<br>(0.05-0.07)   | 0.05<br>(0.04-0.06)   | 0.06<br>(0.05-0.07)   | .25         | -0.007<br>(-0.02, 0.01)            | -11.0<br>(-35.2, 13.2)     |
| Other vegetables                         | 0.27<br>(0.24-0.29)           | 0.26<br>(0.23-0.29)   | 0.28<br>(0.26-0.30)   | 0.26<br>(0.24-0.29)   | 0.25<br>(0.22-0.29)   | 0.27<br>(0.24-0.31)   | 0.25<br>(0.23-0.27)   | 0.26<br>(0.24-0.28)   | 0.24<br>(0.21-0.26)   | .16         | -0.03<br>(-0.06, 0.008)            | -10.1<br>(-22.6, 2.38)     |
| Vegetables excluding potatoes/starchy    | 0.60<br>(0.56-0.64)           | 0.62<br>(0.58-0.65)   | 0.65<br>(0.62-0.69)   | 0.61<br>(0.58-0.64)   | 0.57<br>(0.51-0.63)   | 0.61<br>(0.57-0.65)   | 0.59<br>(0.56-0.62)   | 0.62<br>(0.59-0.65)   | 0.57<br>(0.54-0.61)   | .13         | -0.02<br>(-0.08, 0.03)             | -3.79<br>(-12.9, 5.28)     |
| Total grains, servings/d                 |                               |                       |                       |                       |                       |                       |                       |                       |                       |             |                                    |                            |
| Whole grains                             | 0.46<br>(0.39-0.52)           | 0.54<br>(0.49-0.58)   | 0.48<br>(0.43-0.53)   | 0.55<br>(0.47-0.63)   | 0.58<br>(0.51-0.65)   | 0.67<br>(0.64-0.71)   | 0.82<br>(0.76-0.88)   | 0.87<br>(0.79-0.95)   | 0.95<br>(0.88-1.03)   | <.001       | 0.50<br>(0.40, 0.59)               | 109<br>(77.0, 141)         |
| Refined grains                           | 6.29<br>(6.09-6.49)           | 6.39<br>(6.22-6.57)   | 6.09<br>(5.96-6.22)   | 6.12<br>(5.97-6.27)   | 6.04<br>(5.92-6.17)   | 6.28<br>(6.16-6.41)   | 6.13<br>(6.01-6.26)   | 6.24<br>(6.14-6.35)   | 6.29<br>(6.14-6.44)   | .75         | 0<br>(-0.25, 0.25)                 | -0.003<br>(-3.94, 3.94)    |
| Nuts and seeds, servings/d               | 0.34<br>(0.26-0.42)           | 0.31<br>(0.25-0.36)   | 0.35<br>(0.29-0.41)   | 0.36<br>(0.31-0.41)   | 0.36<br>(0.31-0.40)   | 0.37<br>(0.31-0.43)   | 0.39<br>(0.32-0.46)   | 0.34<br>(0.29-0.39)   | 0.40<br>(0.34-0.46)   | .11         | 0.06<br>(-0.04, 0.16)              | 17.0<br>(-15.0, 49.0)      |
| Legumes, servings/d                      | 0.07<br>(0.05-0.08)           | 0.06<br>(0.05-0.07)   | 0.06<br>(0.05-0.08)   | 0.06<br>(0.04-0.07)   | 0.06<br>(0.04-0.07)   | 0.07<br>(0.06-0.08)   | 0.07<br>(0.06-0.09)   | 0.07<br>(0.06-0.08)   | 0.08<br>(0.06-0.09)   | .02         | 0.01<br>(-0.009, 0.03)             | 14.6<br>(-15.4, 44.5)      |
| Total meat, serving/d                    |                               |                       |                       |                       |                       |                       |                       |                       |                       |             |                                    |                            |
| Processed meat                           | 0.25<br>(0.21-0.28)           | 0.24<br>(0.21-0.26)   | 0.25<br>(0.24-0.27)   | 0.25<br>(0.22-0.27)   | 0.26<br>(0.23-0.28)   | 0.25<br>(0.23-0.26)   | 0.26<br>(0.24-0.29)   | 0.25<br>(0.23-0.27)   | 0.27<br>(0.24-0.29)   | .17         | 0.02<br>(-0.02, 0.07)              | 8.63<br>(-10.4, 27.7)      |
| Unprocessed red meat                     | 0.35<br>(0.31-0.39)           | 0.35<br>(0.31-0.39)   | 0.35<br>(0.31-0.39)   | 0.34<br>(0.31-0.36)   | 0.34<br>(0.30-0.37)   | 0.32<br>(0.29-0.36)   | 0.30<br>(0.27-0.33)   | 0.32<br>(0.30-0.35)   | 0.31<br>(0.28-0.34)   | .01         | -0.04<br>(-0.09, 0.01)             | -10.6<br>(-24.1, 2.83)     |
| Poultry                                  | 0.28<br>(0.24-0.33)           | 0.27<br>(0.24-0.31)   | 0.33<br>(0.31-0.35)   | 0.34<br>(0.31-0.37)   | 0.38<br>(0.35-0.42)   | 0.39<br>(0.36-0.42)   | 0.36<br>(0.31-0.41)   | 0.39<br>(0.34-0.44)   | 0.36<br>(0.32-0.39)   | <.001       | 0.07<br>(0.02, 0.12)               | 25.0<br>(3.98, 46.0)       |
| Fish and Shellfish                       | 0.06<br>(0.04-0.07)           | 0.07<br>(0.05-0.08)   | 0.07<br>(0.05-0.08)   | 0.08<br>(0.05-0.10)   | 0.06<br>(0.05-0.07)   | 0.06<br>(0.05-0.08)   | 0.08<br>(0.06-0.10)   | 0.07<br>(0.05-0.10)   | 0.06<br>(0.05-0.07)   | .47         | 0.004<br>(-0.02, 0.02)             | 7.15<br>(-29.3, 43.6)      |
| High in omega-3 fatty acids <sup>b</sup> | 0.01<br>(0.007-0.02)          | 0.01<br>(0.009-0.02)  | 0.01<br>(0.009-0.02)  | 0.02<br>(0.008-0.02)  | 0.01<br>(0.005-0.02)  | 0.01<br>(0.01-0.02)   | 0.01<br>(0.009-0.02)  | 0.01<br>(0.008-0.02)  | 0.02<br>(0.01-0.02)   | .45         | 0.005<br>(-0.002, 0.01)            | 43.9<br>(-32.8, 121)       |
| Low in omega-3 fatty acids <sup>b</sup>  | 0.04<br>(0.03-0.06)           | 0.05<br>(0.04-0.07)   | 0.05<br>(0.04-0.07)   | 0.06<br>(0.04-0.08)   | 0.05<br>(0.04-0.06)   | 0.05<br>(0.03-0.06)   | 0.07<br>(0.04-0.09)   | 0.06<br>(0.04-0.08)   | 0.04<br>(0.03-0.05)   | .54         | -0.001<br>(-0.02, 0.02)            | -2.02<br>(-38.1, 34.0)     |
| Eggs, servings/d                         | 0.25<br>(0.23-0.27)           | 0.29<br>(0.25-0.32)   | 0.30<br>(0.26-0.33)   | 0.35<br>(0.33-0.38)   | 0.37<br>(0.34-0.41)   | 0.36<br>(0.32-0.4)    | 0.36<br>(0.32-0.39)   | 0.36<br>(0.34-0.38)   | 0.39<br>(0.36-0.43)   | <.001       | 0.14<br>(0.10, 0.19)               | 57.2<br>(37.4, 77.0)       |
| Total dairy, servings/d                  | 1.99<br>(1.88-2.10)           | 2.18<br>(2.08-2.27)   | 2.22<br>(2.09-2.36)   | 2.20<br>(2.13-2.28)   | 2.19<br>(2.11-2.27)   | 2.38<br>(2.30-2.46)   | 2.35<br>(2.23-2.46)   | 2.29<br>(2.19-2.39)   | 2.13<br>(1.98-2.28)   | .005        | 0.14<br>(-0.04, 0.33)              | 7.23<br>(-2.33, 16.8)      |
| Milk                                     | 1.36                          | 1.50                  | 1.47                  | 1.45                  | 1.40                  | 1.45                  | 1.38                  | 1.27                  | 1.19                  | <.001       | -0.17                              | -12.5                      |

|                                                     |                     |                     |                     |                     |                     |                     |                     |                     |                     |       |                         |                         |
|-----------------------------------------------------|---------------------|---------------------|---------------------|---------------------|---------------------|---------------------|---------------------|---------------------|---------------------|-------|-------------------------|-------------------------|
|                                                     | (1.28-1.45)         | (1.43-1.58)         | (1.34-1.59)         | (1.37-1.53)         | (1.33-1.47)         | (1.39-1.51)         | (1.29-1.48)         | (1.22-1.33)         | (1.09-1.29)         |       | (-0.30, -0.04)          | (-21.6, -3.37)          |
| Cheese                                              | 0.56<br>(0.51-0.61) | 0.58<br>(0.53-0.62) | 0.67<br>(0.62-0.72) | 0.65<br>(0.62-0.67) | 0.65<br>(0.62-0.68) | 0.78<br>(0.73-0.83) | 0.81<br>(0.76-0.86) | 0.84<br>(0.80-0.88) | 0.78<br>(0.72-0.84) | <.001 | 0.21<br>(0.14, 0.29)    | 38.0<br>(21.9, 54.2)    |
| Yogurt                                              | 0.03<br>(0.02-0.04) | 0.04<br>(0.03-0.06) | 0.04<br>(0.03-0.05) | 0.05<br>(0.04-0.05) | 0.04<br>(0.03-0.05) | 0.06<br>(0.05-0.07) | 0.06<br>(0.05-0.08) | 0.07<br>(0.06-0.08) | 0.06<br>(0.05-0.07) | <.001 | 0.03<br>(0.02, 0.05)    | 122<br>(29.8, 215)      |
| Sugar-sweetened beverages <sup>c</sup> , servings/d | 2.00<br>(1.80-2.20) | 1.83<br>(1.70-1.97) | 1.87<br>(1.72-2.03) | 1.61<br>(1.46-1.76) | 1.52<br>(1.39-1.64) | 1.32<br>(1.22-1.42) | 1.33<br>(1.24-1.43) | 1.19<br>(1.05-1.32) | 1.00<br>(0.90-1.10) | <.001 | -1.0<br>(-1.22, -0.78)  | -50.0<br>(-57.1, -43.0) |
| Added sugar, g./d                                   | 106<br>(99.9-112)   | 99.4<br>(95.7-103)  | 88.9<br>(84.2-93.6) | 85.2<br>(82.4-88.0) | 86.6<br>(83.7-89.4) | 80.9<br>(77.5-84.3) | 78.5<br>(76.5-80.5) | 76.7<br>(73.9-79.6) | 71.4<br>(69.0-73.9) | <.001 | -34.4<br>(-40.8, -28.1) | -32.5<br>(-36.9, -28.1) |
| <b>Macronutrients</b>                               |                     |                     |                     |                     |                     |                     |                     |                     |                     |       |                         |                         |
| Total fat, %Energy (E)                              | 32.2<br>(31.6-32.8) | 32.0<br>(31.5-32.5) | 32.9<br>(32.5-33.4) | 33.1<br>(32.7-33.5) | 33.1<br>(32.7-33.4) | 32.5<br>(32.1-32.8) | 32.7<br>(32.3-33.1) | 32.9<br>(32.6-33.3) | 34.5<br>(34.1-35.0) | <.001 | 2.34<br>(1.62, 3.06)    | 7.28<br>(4.96, 9.60)    |
| Saturated fat, %E                                   | 11.5<br>(11.2-11.8) | 11.3<br>(11.1-11.5) | 11.6<br>(11.4-11.8) | 11.8<br>(11.7-11.9) | 11.6<br>(11.4-11.8) | 11.3<br>(11.1-11.5) | 11.3<br>(11.1-11.5) | 11.5<br>(11.3-11.7) | 12.1<br>(11.9-12.4) | .047  | 0.65<br>(0.23, 1.07)    | 5.66<br>(1.90, 9.42)    |
| Monounsaturated fat, %E                             | 14.8<br>(14.2-15.3) | 14.5<br>(13.9-15.0) | 13.4<br>(12.8-14.0) | 14.0<br>(13.5-14.4) | 15.0<br>(14.6-15.4) | 13.7<br>(13.3-14.1) | 13.4<br>(13.1-13.8) | 13.9<br>(13.5-14.4) | 15.1<br>(14.6-15.6) | .82   | 0.32<br>(-0.44, 1.08)   | 2.17<br>(-2.99, 7.34)   |
| Polyunsaturated fat, %E                             | 6.17<br>(6.03-6.32) | 5.94<br>(5.80-6.09) | 6.46<br>(6.35-6.56) | 6.41<br>(6.23-6.59) | 6.53<br>(6.43-6.64) | 6.84<br>(6.72-6.97) | 7.41<br>(7.28-7.55) | 7.29<br>(7.10-7.47) | 7.58<br>(7.47-7.69) | <.001 | 1.41<br>(1.23, 1.58)    | 22.8<br>(19.5, 26.1)    |
| Seafood omega-3 fat, mg/d                           | 51<br>(42-60)       | 50<br>(43-56.9)     | 63.5<br>(52.6-74.4) | 65.1<br>(49.1-81)   | 58<br>(40.6-75.4)   | 49.9<br>(43.2-56.6) | 46.9<br>(35.7-58.2) | 43.2<br>(35.1-51.2) | 42.3<br>(35.8-48.7) | .002  | -8.74<br>(-19.8, 2.33)  | -17.1<br>(-36.3, 2.02)  |
| Plant omega-3 fat, mg/d                             | 116<br>(112-120)    | 115<br>(111-120)    | 122<br>(120-124)    | 117<br>(112-121)    | 117<br>(114-121)    | 127<br>(124-130)    | 143<br>(139-146)    | 145<br>(140-149)    | 146<br>(144-148)    | <.001 | 29.7<br>(24.9, 34.6)    | 25.6<br>(20.6, 30.6)    |
| Protein, %E                                         | 13.5<br>(13.1-13.8) | 13.7<br>(13.5-13.9) | 14.2<br>(13.8-14.5) | 14.3<br>(14.1-14.5) | 14.6<br>(14.4-14.8) | 14.8<br>(14.6-15)   | 14.7<br>(14.5-14.8) | 15.1<br>(14.8-15.5) | 14.8<br>(14.6-15)   | <.001 | 1.29<br>(0.90, 1.69)    | 9.62<br>(6.47, 12.8)    |
| Carbohydrate, %E                                    | 55.4<br>(54.8-56)   | 55.2<br>(54.7-55.8) | 53.9<br>(53.3-54.4) | 53.6<br>(53.1-54)   | 53.4<br>(52.9-53.9) | 53.8<br>(53.3-54.3) | 53.8<br>(53.3-54.2) | 53.0<br>(52.6-53.5) | 51.9<br>(51.3-52.4) | <.001 | -3.52<br>(-4.34, -2.69) | -6.35<br>(-7.78, -4.92) |
| <b>Other nutrients</b>                              |                     |                     |                     |                     |                     |                     |                     |                     |                     |       |                         |                         |
| Sodium, mg/d                                        | 3166<br>(3089-3242) | 3148<br>(3111-3184) | 3193<br>(3154-3232) | 3263<br>(3205-3322) | 3302<br>(3261-3343) | 3307<br>(3252-3362) | 3241<br>(3180-3303) | 3387<br>(3287-3486) | 3326<br>(3285-3367) | <.001 | 160<br>(73.8, 247)      | 5.07<br>(2.25, 7.89)    |
| Cholesterol, mg/d                                   | 218<br>(212-224)    | 222<br>(214-229)    | 229<br>(222-236)    | 231<br>(223-240)    | 245<br>(237-252)    | 231<br>(221-240)    | 230<br>(222-238)    | 245<br>(237-254)    | 254<br>(245-263)    | <.001 | 36.0<br>(24.8, 47.2)    | 16.5<br>(11.1, 21.9)    |
| Fiber, g/d                                          | 12.4<br>(12.0-12.9) | 12.3<br>(12.0-12.7) | 12.5<br>(12.1-12.9) | 13.1<br>(12.6-13.5) | 13.6<br>(13.2-14)   | 14.7<br>(14.3-15.1) | 15.2<br>(14.9-15.5) | 15.2<br>(14.8-15.5) | 15.6<br>(15.2-16)   | <.001 | 3.14<br>(2.53, 3.76)    | 25.3<br>(19.6, 30.9)    |
| Potassium, mg/d                                     | 2260<br>(2191-2329) | 2236<br>(2180-2292) | 2281<br>(2214-2349) | 2265<br>(2227-2303) | 2260<br>(2214-2306) | 2367<br>(2322-2412) | 2362<br>(2324-2400) | 2351<br>(2310-2391) | 2291<br>(2251-2330) | .001  | 30.6<br>(-49.0, 110)    | 1.35<br>(-2.17, 4.88)   |
| calcium, mg/d                                       | 875<br>(844-907)    | 963<br>(934-993)    | 987<br>(944-1030)   | 1006<br>(981-1031)  | 1042<br>(1017-1068) | 1120<br>(1093-1146) | 1107<br>(1075-1139) | 1098<br>(1063-1133) | 1061<br>(1017-1105) | <.001 | 186<br>(132, 240)       | 21.2<br>(14.6, 27.8)    |

Abbreviation: NHANES, National Health and Nutrition Examination Survey.

<sup>a</sup> Data were weighted to be nationally representative. All analyses (except for macronutrients) were energy-adjusted to 2000 kcal/d using the residual method. Macronutrients were reported as % of total energy.

<sup>b</sup> Cooked fish and shellfish containing 500 mg or more of omega-3 fatty acids (EPA and DHA) per 3 ounces were included in the high omega-3 fatty acids category.

<sup>c</sup> Serving of sugar-sweetened beverage defined as 8 fl oz or 237 grams. Sugar-sweetened beverages include soft drinks, fruit drinks, sports drinks, presweetened teas and energy drinks with more than 50 kcal per 8 fl oz.

*P* for trend was estimated by treating survey-cycle as a continuous variable in a survey-weighted linear regression model.

**eTable 8. Impact of Adjusting for Demographic Changes in Age, Sex, and Race/Ethnicity on Observed Trends for Selected Dietary Factors Among US Children Aged 2-19 Years Old From 1999 to 2016<sup>a</sup>**

| Dietary factors                       | 18-year change in mean consumption (95% CI), estimated from linear trend model |                                                 | % change in trend coefficient after adjusting for age, sex and race/ethnicity (95% CI) <sup>b</sup> |
|---------------------------------------|--------------------------------------------------------------------------------|-------------------------------------------------|-----------------------------------------------------------------------------------------------------|
|                                       | Unadjusted change                                                              | Change adjusted for age, sex and race/ethnicity |                                                                                                     |
| Legumes, servings/d                   | 0.02 (0.003, 0.03)                                                             | 0.01 (-0.005, 0.02)                             | -53.2 (-138, -31.3)                                                                                 |
| Cholesterol, mg/d                     | 32.3 (23.0, 41.6)                                                              | 27.4 (18.6, 36.3)                               | -15.1 (-21.6, -10.4)                                                                                |
| Eggs, servings/d                      | 0.14 (0.10, 0.17)                                                              | 0.12 (0.09, 0.15)                               | -11.0 (-15.7, -7.67)                                                                                |
| Milk, servings/d                      | -0.23 (-0.33, -0.13)                                                           | -0.21 (-0.30, -0.12)                            | -8.68 (-18.7, -1.11)                                                                                |
| Potassium                             | 109 (46.7, 171)                                                                | 100 (38.8, 161)                                 | -8.34 (-17.6, -1.10)                                                                                |
| Poultry, servings/d                   | 0.11 (0.07, 0.15)                                                              | 0.11 (0.06, 0.14)                               | -7.40 (-12.2, -3.39)                                                                                |
| Protein, %E                           | 1.62 (1.31, 1.93)                                                              | 1.54 (1.23, 1.86)                               | -4.84 (-7.01, -2.89)                                                                                |
| Sodium, mg/d                          | 224 (150, 297)                                                                 | 217 (143, 290)                                  | -3.27 (-7.66, 0.28)                                                                                 |
| Added sugar, g/d                      | -34.6 (-39.3, -29.8)                                                           | -33.5 (-38.1, -28.8)                            | -13.4 (-18.9, -7.81)                                                                                |
| Fiber, g/d                            | 4.20 (3.74, 4.66)                                                              | 4.09 (3.63, 4.54)                               | -2.72 (-3.84, -1.63)                                                                                |
| White potatoes, servings/d            | -0.07 (-0.10, -0.03)                                                           | -0.07 (-0.10, -0.03)                            | -2.15 (-6.84, 2.21)                                                                                 |
| Plant omega3 fat, mg/d                | 39.0 (34.8, 43.2)                                                              | 38.2 (34.0, 42.5)                               | -1.93 (-3.13, -0.76)                                                                                |
| Carbohydrate, %E                      | -3.11 (-3.76, -2.45)                                                           | -3.05 (-3.72, -2.38)                            | -1.84 (-4.07, 0.40)                                                                                 |
| Polyunsaturated fat, % E              | 1.80 (1.64, 1.96)                                                              | 1.79 (1.63, 1.94)                               | -0.75 (-2.04, 0.51)                                                                                 |
| Sugar-sweetened beverages, servings/d | -1.10 (-1.26, -0.93)                                                           | -1.09 (-1.25, -0.93)                            | -0.62 (-3.34, 2.24)                                                                                 |
| Whole fruit, servings/d               | 0.32 (0.24, 0.39)                                                              | 0.32 (0.24, 0.39)                               | -0.23 (-2.67, 2.54)                                                                                 |
| Red/orange vegetable, servings/d      | 0.01 (0.001, 0.03)                                                             | 0.02 (0.001, 0.03)                              | 0.71 (-6.26, 7.32)                                                                                  |
| Dark green vegetables, serving/d      | 0.03 (0.02, 0.05)                                                              | 0.03 (0.02, 0.05)                               | 0.73 (-2.44, 3.24)                                                                                  |
| Whole grain, servings/d               | 0.57 (0.50, 0.65)                                                              | 0.59 (0.51, 0.66)                               | 2.57 (1.53, 3.86)                                                                                   |
| Cheese, servings/d                    | 0.31 (0.25, 0.36)                                                              | 0.32 (0.26, 0.37)                               | 2.98 (1.23, 5.04)                                                                                   |
| Total fat, %energy                    | 1.68 (1.11, 2.24)                                                              | 1.73 (1.13, 2.32)                               | 3.0 (0.35, 6.20)                                                                                    |
| Calcium, mg/d                         | 224 (182, 266)                                                                 | 231 (194, 269)                                  | 3.1 (0.42, 5.84)                                                                                    |
| Tomatoes, servings/d                  | -0.06 (-0.08, -0.04)                                                           | -0.06 (-0.08, -0.05)                            | 4.7 (0.76, 9.29)                                                                                    |
| Yogurt, servings/d                    | 0.04 (0.02, 0.05)                                                              | 0.04 (0.03, 0.05)                               | 5.6 (1.7, 10.9)                                                                                     |
| 100% fruit juice, servings/d          | -0.21 (-0.28, -0.13)                                                           | -0.22 (-0.29, -0.15)                            | 6.6 (-0.68, 16.2)                                                                                   |
| Total vegetables, servings/d          | -0.07 (-0.13, -0.01)                                                           | -0.08 (-0.14, -0.02)                            | 10.5 (1.6, 35.9)                                                                                    |
| Unprocessed red meat                  | -0.05 (-0.09, -0.01)                                                           | -0.06 (-0.10, -0.02)                            | 13.7 (2.3, 42.1)                                                                                    |
| Seafood omega-3 fat, mg/d             | -15.6 (-25.6, -5.72)                                                           | -17.9 (-27.3, -8.49)                            | 14.5 (6.9, 33.3)                                                                                    |
| Saturated fat, %energy                | 0.32 (0.008, 0.63)                                                             | 0.37 (0.06, 0.67)                               | 14.6 (7.2, 45.4)                                                                                    |
| Dairy, servings/d                     | 0.20 (0.06, 0.34)                                                              | 0.23 (0.11, 0.35)                               | 14.7 (2.9, 32.2)                                                                                    |

<sup>a</sup> Data are weighted to nationally representative. The dietary factors were selected with *P*-value of trend less than 0.05 in unadjusted models (details appear in eTable 4).

<sup>b</sup> The value represents the percent change in the estimated trend coefficient after adjustment for age group, sex and race/ethnicity, suggesting that some of the observed trend was due to demographic changes. Positive values indicated that the trend strengthened after adjustment for age, sex and race/ethnicity, suggesting that the trend strengthened after accounting for changes in the age, sex and race/ethnicity distribution. The estimated 95% confidence interval (CI) of the estimated percent change in trend coefficient was estimated from bias-corrected bootstrap with 2,500 resampling. If the 95% CI did not overlap with zero, there was statistically significant attenuation or de-attenuation following adjustment for demographics.

**eTable 9. Trends in Estimated Primary and Secondary American Heart Association (AHA) Diet Scores by Age Group, Sex, Race/Ethnicity, Parental Education, Household Income, Food Security Status, and Participation of Food Assistance Programs by NHANES Survey Cycles, 1999-2016**

|                                                | Survey-Weighted Mean (95% CI) |                     |                       |                     |                     |                     |                     |                     |                     | P for trend | P for interaction |
|------------------------------------------------|-------------------------------|---------------------|-----------------------|---------------------|---------------------|---------------------|---------------------|---------------------|---------------------|-------------|-------------------|
|                                                | 1999-2000                     | 2001-2002           | 2003-2004             | 2005-2006           | 2007-2008           | 2009-2010           | 2011-2012           | 2013-2014           | 2015-2016           |             |                   |
| <b>AHA primary score</b>                       |                               |                     |                       |                     |                     |                     |                     |                     |                     |             |                   |
| <b>Age group, y</b>                            |                               |                     |                       |                     |                     |                     |                     |                     |                     |             |                   |
| 2-5                                            | 17.8<br>(16.5-19.0)           | 18.1<br>(17.4-18.8) | 18.9<br>(17.6-20.3)   | 19.9<br>(18.9-20.9) | 19.7<br>(18.8-20.5) | 21.2<br>(20.4-22.0) | 21.4<br>(20.8-22.0) | 21.7<br>(21.0-22.5) | 21.4<br>(20.7-22.1) | <.001       |                   |
| 6-11                                           | 14.9<br>(14.1-15.6)           | 15.9<br>(15.0-16.7) | 16.5<br>(15.7-17.3)   | 18.0<br>(16.5-19.6) | 16.9<br>(16.0-17.8) | 18.2<br>(17.7-18.6) | 19.5<br>(18.5-20.6) | 19.7<br>(18.8-20.5) | 19.4<br>(18.5-20.2) | <.001       | .15               |
| 12-19                                          | 13.2<br>(12.3-14.0)           | 13.9<br>(13.4-14.5) | 13.7<br>(13.0-14.5)   | 14.2<br>(13.4-14.9) | 14.8<br>(13.8-15.8) | 15.5<br>(14.8-16.2) | 16.0<br>(15.1-16.8) | 16.3<br>(15.5-17.1) | 17.2<br>(16.3-18)   | <.001       |                   |
| <b>Sex</b>                                     |                               |                     |                       |                     |                     |                     |                     |                     |                     |             |                   |
| Female                                         | 15.2<br>(14.6-15.8)           | 15.8<br>(15.4-16.2) | 16.1<br>(15.3-16.9)   | 16.9<br>(15.9-18.0) | 16.9<br>(15.9-17.8) | 17.7<br>(17.0-18.4) | 18.6<br>(18.0-19.2) | 18.8<br>(17.8-19.7) | 19.0<br>(18.3-19.7) | <.001       | .24               |
| Male                                           | 14.3<br>(13.5-15.2)           | 15.2<br>(14.3-16)   | 15.4<br>(14.6-16.2)   | 16.4<br>(15.4-17.4) | 16.3<br>(15.5-17.1) | 17.5<br>(17-18)     | 18.1<br>(17.2-18.9) | 18.4<br>(17.5-19.3) | 18.7<br>(17.8-19.5) | <.001       |                   |
| <b>Race/ethnicity</b>                          |                               |                     |                       |                     |                     |                     |                     |                     |                     |             |                   |
| Non-Hispanic white                             | 15.1<br>(14.2-16.0)           | 15.7<br>(14.9-16.5) | 15.5<br>(14.5-16.5)   | 16.7<br>(15.3-18.1) | 16.4<br>(15.3-17.4) | 17.7<br>(16.8-18.5) | 18.2<br>(17.4-19.1) | 18.3<br>(17.1-19.5) | 18.9<br>(18.1-19.8) | <.001       | .04               |
| Non-Hispanic black                             | 13.8<br>(13.3-14.3)           | 14.6<br>(13.9-15.3) | 15.4<br>(14.6-16.1)   | 15.7<br>(15.0-16.4) | 15.8<br>(15.2-16.3) | 16.9<br>(15.9-17.9) | 17.4<br>(16.3-18.4) | 17.5<br>(16.9-18.1) | 17.5<br>(16.6-18.4) | <.001       |                   |
| Mexican American                               | 15.3<br>(14.7-15.8)           | 15.9<br>(15.0-16.8) | 16.5<br>(15.2-17.7)   | 17.2<br>(16.8-17.7) | 16.6<br>(15.6-17.5) | 17.5<br>(16.4-18.5) | 18.5<br>(17.9-19.1) | 18.5<br>(17.7-19.3) | 18.2<br>(16.8-19.6) | <.001       |                   |
| <b>Parental education</b>                      |                               |                     |                       |                     |                     |                     |                     |                     |                     |             |                   |
| <High school                                   | 13.3<br>(12.1-14.6)           | 14.0<br>(13.5-14.5) | 15.9<br>(14.6-17.3)   | 16.4<br>(15.5-17.3) | 16.1<br>(15.1-17.0) | 16.9<br>(16.2-17.6) | 16.9<br>(15.8-17.9) | 17.5<br>(16.5-18.5) | 18.1<br>(16.8-19.4) | <.001       | .38               |
| High school graduate or GED                    | 14.3<br>(13.6-15.1)           | 14.7<br>(13.8-15.6) | 14.9<br>(14.2-15.5)   | 15.9<br>(15.0-16.8) | 15.1<br>(14.6-15.7) | 16.0<br>(15.4-16.7) | 17.5<br>(16.4-18.6) | 17.5<br>(16.4-18.7) | 17.5<br>(16.1-18.8) | <.001       |                   |
| Some college                                   | 14.3<br>(13.4-15.2)           | 16.0<br>(15.3-16.8) | 15.2.0<br>(14.6-15.9) | 16.6<br>(15.3-17.9) | 15.8<br>(15.1-16.5) | 18.0<br>(16.9-19.1) | 17.3<br>(16.5-18.1) | 17.8<br>(16.7-18.9) | 18.4<br>(17.8-19)   | <.001       |                   |
| ≥ College                                      | 17.1<br>(15.7-18.5)           | 17.2<br>(16.4-18.0) | 18.2<br>(16.7-19.8)   | 18.0<br>(16.2-19.8) | 19.6<br>(18.5-20.7) | 18.9<br>(17.9-19.9) | 21.5<br>(20.3-22.6) | 21.0<br>(19.9-22.2) | 20.8<br>(19.8-21.9) | <.001       |                   |
| <b>Ratio of family income to poverty level</b> |                               |                     |                       |                     |                     |                     |                     |                     |                     |             |                   |
| <1.30                                          | 14.5<br>(13.5-15.5)           | 14.7<br>(14.1-15.4) | 15.9<br>(15.1-16.8)   | 16.7<br>(15.7-17.6) | 16.1<br>(14.8-17.5) | 16.5<br>(15.8-17.2) | 17.2<br>(16.3-18.1) | 17.8<br>(16.8-18.9) | 17.5<br>(16.5-18.5) | <.001       |                   |
| 1.30-1.849                                     | 13.3<br>(12.1-14.6)           | 15.1<br>(14.0-16.2) | 15.3<br>(14.1-16.6)   | 17.0<br>(15.5-18.4) | 15.2<br>(14.1-16.2) | 17.3<br>(16.2-18.4) | 17.8<br>(16.5-19.1) | 17.8<br>(16.4-19.2) | 17.5<br>(16.6-18.5) | <.001       | .06               |
| 1.85-2.99                                      | 15.1<br>(14.0-16.1)           | 14.8<br>(14.2-15.4) | 15.2<br>(14.2-16.3)   | 16.6<br>(14.8-18.4) | 15.9<br>(14.8-17.0) | 17.9<br>(16.7-19.2) | 16.6<br>(15.3-17.8) | 19.0<br>(17.6-20.4) | 19.2<br>(18.3-20.2) | <.001       |                   |
| ≥3.00                                          | 15.4<br>(14.5-16.3)           | 16.6<br>(15.8-17.5) | 15.8<br>(14.8-16.9)   | 16.5<br>(15.5-17.5) | 17.5<br>(16.6-18.4) | 18.3<br>(17.5-19.1) | 20.7<br>(19.5-22)   | 19.4<br>(18.0-20.8) | 20.1<br>(19.0-21.3) | <.001       |                   |
| <b>Food Security Status</b>                    |                               |                     |                       |                     |                     |                     |                     |                     |                     |             |                   |
| Very low food security                         | 13.5<br>(12.2-14.9)           | 16.2<br>(14.5-17.8) | 15.7<br>(14.0-17.3)   | 15.3<br>(14.3-16.3) | 14.5<br>(13.2-15.7) | 16.9<br>(15.3-18.5) | 17.1<br>(15.2-19)   | 17.7<br>(16.7-18.7) | -                   | <.001       |                   |

|                                                    |                     |                     |                     |                     |                     |                     |                     |                     |                     |       |     |
|----------------------------------------------------|---------------------|---------------------|---------------------|---------------------|---------------------|---------------------|---------------------|---------------------|---------------------|-------|-----|
| Low food security                                  | 13.7<br>(12.0-15.5) | 14.8<br>(13.7-15.9) | 16.1<br>(14.3-17.8) | 16.6<br>(15.6-17.7) | 16.1<br>(14.9-17.4) | 16.5<br>(15.4-17.5) | 17.5<br>(16.8-18.3) | 16.9<br>(15.9-17.9) | -                   | <.001 | .35 |
| Marginal food security                             | 15.2<br>(13.7-16.7) | 13.6<br>(12.7-14.5) | 14.4<br>(13.4-15.3) | 17.1<br>(15.8-18.5) | 14.8<br>(13.8-15.8) | 17.0<br>(16.1-18.0) | 18.0<br>(17.0-19.1) | 18.2<br>(16.9-19.4) | -                   | <.001 |     |
| Food secure                                        | 14.9<br>(14.3-15.6) | 15.7<br>(15.1-16.3) | 15.8<br>(15.1-16.6) | 16.7<br>(15.6-17.8) | 17.0<br>(16.2-17.9) | 17.8<br>(17.1-18.4) | 18.7<br>(17.9-19.6) | 19.1<br>(18.2-20.1) | -                   | <.001 |     |
| <b>Participation of Federal Nutrition Programs</b> |                     |                     |                     |                     |                     |                     |                     |                     |                     |       |     |
| SNAP                                               |                     |                     |                     |                     |                     |                     |                     |                     |                     |       |     |
| Yes                                                | 14.3<br>(13.1-15.6) | 14.8<br>(14.0-15.6) | 16.1<br>(15.0-17.3) | 16.1<br>(15.1-17.0) | 15.5<br>(14.4-16.6) | 16.6<br>(15.9-17.4) | 16.9<br>(16.1-17.7) | 18.0<br>(17.4-18.6) | -                   | <.001 | .21 |
| No                                                 | 14.8<br>(14.1-15.5) | 15.6<br>(15.1-16.1) | 15.7<br>(15.0-16.4) | 16.8<br>(15.7-17.8) | 16.9<br>(16.1-17.7) | 17.9<br>(17.3-18.6) | 19.0<br>(18.2-19.7) | 18.8<br>(17.9-19.7) | -                   | <.001 |     |
| WIC                                                |                     |                     |                     |                     |                     |                     |                     |                     |                     |       |     |
| Yes                                                | 16.0<br>(14.3-17.8) | 15.7<br>(14.9-16.6) | 17.0<br>(15.7-18.4) | 17.7<br>(17.1-18.4) | 17.0<br>(16.4-17.7) | 18.0<br>(17.0-19.1) | 18.9<br>(17.5-20.3) | 18.8<br>(17.4-20.2) | -                   | <.001 |     |
| No                                                 | 14.5<br>(13.9-15.2) | 15.5<br>(15.0-15.9) | 15.6<br>(14.8-16.3) | 16.5<br>(15.4-17.6) | 16.5<br>(15.7-17.3) | 17.6<br>(17.0-18.1) | 18.2<br>(17.5-18.9) | 18.5<br>(17.7-19.3) | -                   | <.001 |     |
| NSLP/SBP                                           |                     |                     |                     |                     |                     |                     |                     |                     |                     |       |     |
| Yes                                                | 14.0<br>(12.7-15.2) | 14.6<br>(14.0-15.3) | 15.6<br>(14.9-16.4) | 16.5<br>(15.7-17.2) | 15.2<br>(14.3-16.1) | 16.3<br>(15.6-16.9) | 17.2<br>(16.6-17.9) | 17.7<br>(17.0-18.4) | 17.5<br>(16.7-18.3) | <.001 |     |
| No                                                 | 15.1<br>(14.4-15.9) | 15.8<br>(15.3-16.3) | 15.8<br>(15.0-16.6) | 16.7<br>(15.6-17.8) | 17.1<br>(16.3-17.9) | 18.3<br>(17.7-18.8) | 18.9<br>(18.2-19.7) | 19.0<br>(18.1-19.9) | 19.7<br>(18.9-20.4) | <.001 |     |
| <b>AHA secondary score</b>                         |                     |                     |                     |                     |                     |                     |                     |                     |                     |       |     |
| Age group, y                                       |                     |                     |                     |                     |                     |                     |                     |                     |                     |       |     |
| 2-5                                                | 32.6<br>(30.3-34.8) | 32.8<br>(31.7-33.9) | 33.3<br>(31.5-35.0) | 35.3<br>(33.8-36.9) | 34.2<br>(32.9-35.6) | 36.6<br>(35.4-37.9) | 36.6<br>(34.9-38.3) | 36.7<br>(35.4-38.1) | 36.0<br>(35.0-37.0) | <.001 |     |
| 6-11                                               | 28.7<br>(27.4-30)   | 30.3<br>(29-31.5)   | 31.3<br>(30.4-32.2) | 32.4<br>(30.6-34.1) | 31.3<br>(30.0-32.6) | 33.5<br>(32.6-34.5) | 34.2<br>(32.7-35.7) | 34.2<br>(32.8-35.5) | 33.3<br>(31.9-34.7) | <.001 | .28 |
| 12-19                                              | 28.0<br>(26.5-29.4) | 28.6<br>(27.7-29.4) | 27.8<br>(26.7-29.0) | 28.6<br>(27.2-30.0) | 29.3<br>(27.9-30.7) | 30.4<br>(29.4-31.3) | 31.3<br>(30.2-32.4) | 30.9<br>(30.1-31.6) | 31.3<br>(30.1-32.4) | <.001 |     |
| Sex                                                |                     |                     |                     |                     |                     |                     |                     |                     |                     |       |     |
| Female                                             | 30.1<br>(29.0-31.2) | 30.9<br>(30.2-31.6) | 30.6<br>(29.3-31.8) | 31.8<br>(30.3-33.2) | 31.9<br>(30.5-33.2) | 33.1<br>(32.2-34.0) | 33.9<br>(32.9-34.9) | 33.9<br>(33.0-34.8) | 33.5<br>(32.5-34.5) | <.001 | .51 |
| Male                                               | 28.4<br>(27.0-29.8) | 29.2<br>(28.0-30.4) | 29.7<br>(28.8-30.6) | 30.8<br>(29.5-32.2) | 30.3<br>(29.0-31.5) | 32.5<br>(31.7-33.3) | 33.0<br>(31.8-34.2) | 32.5<br>(31.5-33.5) | 32.4<br>(31.1-33.7) | <.001 |     |
| Race/ethnicity                                     |                     |                     |                     |                     |                     |                     |                     |                     |                     |       |     |
| Non-Hispanic white                                 | 29.8<br>(28.4-31.3) | 30.2<br>(29.0-31.4) | 29.8<br>(28.5-31.2) | 31.5<br>(29.6-33.4) | 30.9<br>(29.4-32.5) | 32.8<br>(31.8-33.9) | 33.6<br>(32.4-34.9) | 32.5<br>(31.2-33.8) | 32.8<br>(31.6-34.1) | <.001 |     |
| Non-Hispanic black                                 | 27.2<br>(26.0-28.3) | 28.1<br>(26.8-29.3) | 28.9<br>(27.8-29.9) | 29.0<br>(27.9-30.1) | 28.9<br>(28.1-29.6) | 31.3<br>(30.0-32.5) | 31.1<br>(29.5-32.6) | 31.9<br>(30.6-33.1) | 31.4<br>(29.9-32.9) | <.001 |     |
| Mexican American                                   | 30.0<br>(29.0-30.9) | 31.0<br>(30.1-31.8) | 31.4<br>(29.6-33.2) | 32.9<br>(32.5-33.4) | 31.8<br>(30.6-33.0) | 33.2<br>(31.4-35.1) | 33.8<br>(32.9-34.7) | 33.6<br>(32.6-34.6) | 32.5<br>(30.7-34.4) | <.001 |     |
| Parental education                                 |                     |                     |                     |                     |                     |                     |                     |                     |                     |       |     |
| <High school                                       | 27.1<br>(24.9-29.4) | 27.8<br>(27.0-28.5) | 30.0<br>(28.3-31.7) | 31.0<br>(29.8-32.3) | 29.8<br>(28.5-31.2) | 32.0<br>(31.1-32.8) | 31.9<br>(30.3-33.6) | 32.0<br>(30.7-33.4) | 32.3<br>(30.1-34.4) | <.001 | .46 |
| High school graduate or GED                        | 28.0<br>(26.4-29.6) | 29.1<br>(27.9-30.3) | 28.9<br>(27.5-30.3) | 30.4<br>(29.1-31.6) | 29.1<br>(28.4-29.7) | 30.7<br>(29.8-31.5) | 32.0<br>(30.6-33.4) | 32.2<br>(30.7-33.8) | 31.0<br>(29.3-32.7) | <.001 |     |
| Some college                                       | 29.3                | 30.4                | 29.5                | 31.3                | 30.3                | 33.3                | 32.0                | 32.8                | 32.3                | <.001 |     |



|                                                    |                     |                     |                     |                     |                     |                     |                     |                     |                     |       |     |
|----------------------------------------------------|---------------------|---------------------|---------------------|---------------------|---------------------|---------------------|---------------------|---------------------|---------------------|-------|-----|
|                                                    | (28-30.7)           | (29.4-31.3)         | (28.7-30.2)         | (29.5-33.2)         | (29.1-31.6)         | (31.7-34.9)         | (31.0-33.1)         | (31.4-34.1)         | (31.5-33.1)         |       |     |
| ≥ College                                          | 32.6<br>(30.9-34.2) | 32.7<br>(31.7-33.7) | 33.4<br>(31.4-35.4) | 32.6<br>(30.1-35.1) | 34.8<br>(33.1-36.5) | 34.3<br>(32.9-35.6) | 37.4<br>(35.5-39.2) | 35.4<br>(33.7-37.1) | 35.7<br>(34.1-37.3) | <.001 |     |
| <b>Ratio of family income to poverty level</b>     |                     |                     |                     |                     |                     |                     |                     |                     |                     |       |     |
| <1.30                                              | 28.4<br>(26.8-29.9) | 28.9<br>(27.8-30)   | 30.5<br>(29.0-31.9) | 31.3<br>(29.6-32.9) | 30.5<br>(29-32.1)   | 30.8<br>(29.9-31.8) | 31.9<br>(30.7-33.1) | 32.7<br>(31.2-34.2) | 30.9<br>(29.5-32.4) | <.001 |     |
| 1.30-1.849                                         | 27.3<br>(25.1-29.4) | 28.6<br>(26.9-30.4) | 28.5<br>(26.6-30.3) | 31.5<br>(29.5-33.4) | 29.4<br>(28.3-30.6) | 33.0<br>(31.4-34.7) | 32.2<br>(30.9-33.5) | 33.3<br>(31.6-34.9) | 31.7<br>(29.9-33.5) | <.001 | .24 |
| 1.85-2.99                                          | 29.7<br>(27.9-31.4) | 29.9<br>(28.6-31.1) | 30.0<br>(28.4-31.5) | 31.2<br>(29.5-33.9) | 30.1<br>(28.8-31.4) | 33.1<br>(31.5-34.8) | 31.5<br>(29.6-33.4) | 32.9<br>(31.2-34.6) | 33.2<br>(32.3-34.2) | <.001 |     |
| ≥3.00                                              | 30.8<br>(29.3-32.3) | 31.5<br>(30.5-32.5) | 30.3<br>(29.1-31.5) | 31.2<br>(29.9-32.6) | 32.1<br>(30.8-33.5) | 33.9<br>(32.9-34.9) | 36.6<br>(34.7-38.4) | 33.8<br>(32-35.6)   | 34.8<br>(32.9-36.7) | <.001 |     |
| <b>Food Security Status</b>                        |                     |                     |                     |                     |                     |                     |                     |                     |                     |       |     |
| Very low food security                             | 27.3<br>(24.6-30)   | 31.1<br>(28.6-33.5) | 29.7<br>(27.3-32.1) | 28.4<br>(26.7-30.0) | 28.0<br>(26.2-29.9) | 30.9<br>(28.8-33)   | 31.6<br>(28.9-34.3) | 31.8<br>(30.2-33.4) | -                   | .03   |     |
| Low food security                                  | 28.1<br>(26.5-29.8) | 29.0<br>(27.3-30.7) | 30.8<br>(28.0-33.7) | 31.4<br>(29.9-32.9) | 31.0<br>(29.6-32.3) | 30.7<br>(29.0-32.5) | 32.3<br>(31.3-33.4) | 31.3<br>(29.9-32.6) | -                   | <.001 | .10 |
| Marginal food security                             | 28.7<br>(27.3-30.2) | 27.1<br>(25.7-28.6) | 28.7<br>(26.8-30.6) | 31.6<br>(29.7-33.5) | 29.3<br>(28.0-30.6) | 32.4<br>(31.2-33.5) | 33.5<br>(31.7-35.3) | 33.1<br>(31.2-34.9) | -                   | <.001 |     |
| Food secure                                        | 29.5<br>(28.4-30.6) | 30.4<br>(29.6-31.2) | 30.3<br>(29.3-31.2) | 31.4<br>(29.9-33.0) | 31.5<br>(30.2-32.8) | 33.2<br>(32.6-33.7) | 33.9<br>(32.8-35.0) | 33.8<br>(32.7-34.9) | -                   | <.001 |     |
| <b>Participation of Federal Nutrition Programs</b> |                     |                     |                     |                     |                     |                     |                     |                     |                     |       |     |
| SNAP                                               |                     |                     |                     |                     |                     |                     |                     |                     |                     |       |     |
| Yes                                                | 27.3<br>(25.6-28.9) | 28.5<br>(27.0-29.9) | 30.4<br>(28.5-32.3) | 29.7<br>(28.0-31.5) | 29.4<br>(27.6-31.1) | 31.3<br>(30.2-32.5) | 31.0<br>(29.7-32.4) | 32.9<br>(31.8-33.9) | -                   | <.001 | .27 |
| No                                                 | 29.6<br>(28.4-30.8) | 30.3<br>(29.5-31.1) | 30.1<br>(29.2-30.9) | 31.6<br>(30.1-33.0) | 31.5<br>(30.4-32.6) | 33.3<br>(32.4-34.1) | 34.5<br>(33.4-35.6) | 33.3<br>(32.3-34.2) | -                   | <.001 |     |
| WIC                                                |                     |                     |                     |                     |                     |                     |                     |                     | -                   |       | .05 |
| Yes                                                | 30.2<br>(27.6-32.8) | 29.3<br>(27.8-30.8) | 32.0<br>(30.0-34.0) | 32.5<br>(31.4-33.6) | 31.2<br>(30.0-32.3) | 33.0<br>(31.7-34.4) | 34.2<br>(32.2-36.1) | 33.3<br>(31.4-35.2) | -                   | <.001 |     |
| No                                                 | 29.0<br>(27.8-30.3) | 30.2<br>(29.4-30.9) | 29.8<br>(29.0-30.7) | 31.1<br>(29.6-32.6) | 31.0<br>(29.8-32.3) | 32.8<br>(32.0-33.5) | 33.3<br>(32.2-34.3) | 33.1<br>(32.3-34.0) | -                   | <.001 |     |
| NSLP/SBP                                           |                     |                     |                     |                     |                     |                     |                     |                     |                     |       | .16 |
| Yes                                                | 27.3<br>(25.3-29.4) | 28.8<br>(27.7-29.9) | 29.8<br>(28.6-31.0) | 30.5<br>(29.0-31.9) | 28.9<br>(27.4-30.5) | 31.0<br>(30.3-31.7) | 31.3<br>(30.3-32.4) | 32.2<br>(31.1-33.3) | 31.1<br>(30.2-32.1) | <.001 |     |
| No                                                 | 30.1<br>(29.0-31.1) | 30.5<br>(29.7-31.3) | 30.3<br>(29.2-31.3) | 31.6<br>(30.1-33.1) | 31.9<br>(30.8-33.0) | 33.6<br>(32.8-34.5) | 34.5<br>(33.5-35.5) | 33.7<br>(32.8-34.6) | 34.1<br>(32.9-35.3) | <.001 |     |

Abbreviations: GED, general equivalency diploma; NHANES, National Health and Nutrition Examination Survey; SNAP, Supplemental Nutrition Assistance Program; WIC, Special Supplemental Nutrition Program for Women, Infants, and Children; NSLP, National School Lunch Program; SBP, School Breakfast Program; - indicated data not available.

<sup>a</sup> Data were weighted to be nationally representative.

*P* for trend was estimated by treating survey-cycle as a continuous variable in a survey-weighted logistic regression model. *P* for interaction was calculated using the Wald F test for an interaction term between survey-cycle and sociodemographic subgroups.

**eTable 10. Trends in Estimated Healthy Eating Index (HEI)-2015 by Age Group, Sex, Race/Ethnicity, Parental Education, Household Income, Food Security Status, and Participation of Food Assistance Programs by NHANES Survey Cycles, 1999-2016<sup>a</sup>**

|                                                | Survey-weighted Mean (95% CI) |                     |                     |                     |                     |                     |                     |                     |                     | P for trend | P for interaction |
|------------------------------------------------|-------------------------------|---------------------|---------------------|---------------------|---------------------|---------------------|---------------------|---------------------|---------------------|-------------|-------------------|
|                                                | 1999-2000                     | 2001-2002           | 2003-2004           | 2005-2006           | 2007-2008           | 2009-2010           | 2011-2012           | 2013-2014           | 2015-2016           |             |                   |
| <b>HEI-2015 score</b>                          |                               |                     |                     |                     |                     |                     |                     |                     |                     |             |                   |
| <b>Age group, y</b>                            |                               |                     |                     |                     |                     |                     |                     |                     |                     |             |                   |
| 2-5                                            | 49.4<br>(47.6-51.1)           | 50.0<br>(48.4-51.6) | 52.4<br>(50.9-53.8) | 53.3<br>(51.9-54.8) | 53.4<br>(51.8-55)   | 55.3<br>(53.6-57.0) | 56.0<br>(54.4-57.7) | 55.0<br>(53.6-56.3) | 55.0<br>(53.7-56.4) | <.001       |                   |
| 6-11                                           | 43.9<br>(42.5-45.2)           | 45.3<br>(43.9-46.8) | 48.9<br>(47.2-50.6) | 48.1<br>(46.8-49.5) | 48.0<br>(46.6-49.3) | 49.8<br>(48.9-50.7) | 51.5<br>(50.3-52.8) | 50.5<br>(48.8-52.2) | 49.2<br>(47.9-50.6) | <.001       | .06               |
| 12-19                                          | 42.9<br>(41.6-44.2)           | 44.6<br>(43.6-45.6) | 46.4<br>(45.3-47.4) | 44.9<br>(44.0-45.8) | 45.8<br>(44.5-47.1) | 46.5<br>(45.5-47.6) | 48.8<br>(47.6-50.0) | 47.3<br>(46.4-48.2) | 47.4<br>(46.0-48.8) | <.001       |                   |
| <b>Sex</b>                                     |                               |                     |                     |                     |                     |                     |                     |                     |                     |             |                   |
| Female                                         | 45.4<br>(44.3-46.4)           | 46.6<br>(45.4-47.9) | 49.0<br>(47.6-50.4) | 48.1<br>(47.1-49.2) | 48.7<br>(47.1-50.3) | 49.6<br>(48.6-50.6) | 51.5<br>(50.5-52.5) | 50.6<br>(49.5-51.7) | 50.5<br>(49.6-51.5) | <.001       | .93               |
| Male                                           | 43.9<br>(42.7-45.2)           | 45.4<br>(44.0-46.8) | 48.0<br>(46.9-49.1) | 47.4<br>(46.4-48.3) | 47.6<br>(46.5-48.8) | 49.5<br>(48.4-50.6) | 51.1<br>(49.9-52.3) | 49.3<br>(48.0-50.6) | 48.8<br>(47.2-50.4) | <.001       |                   |
| <b>Race/ethnicity</b>                          |                               |                     |                     |                     |                     |                     |                     |                     |                     |             |                   |
| Non-Hispanic white                             | 44.8<br>(43.6-46.1)           | 45.7<br>(44.2-47.2) | 47.5<br>(45.9-49.2) | 47.2<br>(45.6-48.7) | 47.6<br>(45.9-49.2) | 48.9<br>(47.6-50.2) | 51.0<br>(49.8-52.2) | 49.1<br>(47.7-50.5) | 49.3<br>(47.7-50.9) | <.001       | .07               |
| Non-Hispanic black                             | 43.1<br>(42.2-44.0)           | 44.9<br>(43.8-46.0) | 47.9<br>(46.8-48.9) | 47.1<br>(46.2-48.1) | 47.1<br>(46.1-48.2) | 48.7<br>(46.8-50.7) | 49.8<br>(48.6-50.9) | 48.9<br>(47.9-50.0) | 48.3<br>(46.9-49.7) | <.001       |                   |
| Mexican American                               | 47.6<br>(46.3-48.8)           | 48.3<br>(46.9-49.6) | 51.4<br>(49.5-53.3) | 50.9<br>(49.9-51.9) | 49.9<br>(48.2-51.7) | 51.2<br>(49.7-52.6) | 52.3<br>(51.2-53.3) | 51.6<br>(50.4-52.9) | 50.4<br>(48.7-52.2) | <.001       |                   |
| <b>Parental education</b>                      |                               |                     |                     |                     |                     |                     |                     |                     |                     |             |                   |
| <High school                                   | 42.9<br>(40.9-45.0)           | 44.0<br>(42.6-45.5) | 48.7<br>(47.1-50.3) | 48.9<br>(47.4-50.4) | 48.0<br>(46.7-49.4) | 49.3<br>(48.3-50.2) | 50.8<br>(49.2-52.4) | 49.2<br>(47.8-50.6) | 48.8<br>(46.5-51.2) | <.001       | .39               |
| High school graduate or GED                    | 44.1<br>(42.6-45.6)           | 45.0<br>(43.4-46.6) | 47.5<br>(45.9-49.0) | 46.6<br>(45.5-47.6) | 46.4<br>(45.3-47.6) | 47.6<br>(46.7-48.5) | 49.6<br>(48.4-50.9) | 49.1<br>(47.6-50.7) | 48.4<br>(46.3-50.4) | <.001       |                   |
| Some college                                   | 44.4<br>(42.9-45.9)           | 46.1<br>(44.6-47.6) | 48.0<br>(47.2-48.7) | 47.8<br>(46.9-48.7) | 47.0<br>(45.6-48.3) | 50.2<br>(48.7-51.7) | 49.8<br>(48.9-50.8) | 48.8<br>(47.5-50.2) | 49.4<br>(48.4-50.4) | <.001       |                   |
| ≥ College                                      | 46.6<br>(44.8-48.3)           | 48.6<br>(47.6-49.6) | 50.7<br>(48.4-53.1) | 48.4<br>(45.6-51.1) | 51.9<br>(50.5-53.3) | 50.4<br>(48.7-52.2) | 54.7<br>(52.9-56.5) | 52.6<br>(50.9-54.3) | 51.2<br>(49.5-52.8) | <.001       |                   |
| <b>Ratio of family income to poverty level</b> |                               |                     |                     |                     |                     |                     |                     |                     |                     |             |                   |
| <1.30                                          | 44.5<br>(42.8-46.1)           | 44.9<br>(43.3-46.5) | 49.4<br>(48.0-50.8) | 49.3<br>(47.5-51.0) | 48.1<br>(46.4-49.7) | 48.6<br>(47.4-49.8) | 50.0<br>(48.9-51.1) | 49.6<br>(48.2-51.1) | 48.3<br>(46.7-49.9) | <.001       | .21               |
| 1.30-1.849                                     | 42.7<br>(40.8-44.5)           | 45.1<br>(42.9-47.3) | 47.7<br>(46.3-49.1) | 47.7<br>(45.8-49.6) | 46.0<br>(44.6-47.4) | 50.0<br>(47.6-52.5) | 51.2<br>(49.7-52.7) | 49.9<br>(48.2-51.7) | 48.8<br>(47.2-50.4) | <.001       |                   |
| 1.85-2.99                                      | 45.4<br>(43.0-47.7)           | 45.0<br>(43.9-46.1) | 47.1<br>(45.3-48.9) | 47.3<br>(45.4-49.2) | 47.0<br>(45.3-48.8) | 49.4<br>(47.2-51.7) | 50.1<br>(48.5-51.8) | 49.3<br>(47.6-50.9) | 50.7<br>(48.8-52.7) | <.001       |                   |
| ≥3.00                                          | 45.2<br>(44.1-46.3)           | 47.5<br>(45.9-49)   | 48.6<br>(47.3-49.9) | 46.8<br>(45.9-47.7) | 49.1<br>(47.7-50.5) | 50.0<br>(48.9-51.1) | 53.4<br>(51.6-55.2) | 50.7<br>(48.7-52.8) | 50.1<br>(48.3-51.9) | <.001       |                   |
| <b>Food Security Status</b>                    |                               |                     |                     |                     |                     |                     |                     |                     |                     |             |                   |
| Very low food security                         | 43.4<br>(41.2-45.5)           | 47.5<br>(44.0-51.0) | 47.6<br>(46.5-48.7) | 47.5<br>(45.8-49.3) | 46.2<br>(44.5-48.0) | 47.1<br>(44.9-49.3) | 51.4<br>(49.0-53.8) | 49.5<br>(47.4-51.7) | -                   | <.001       | .21               |
| Low food security                              | 44.5<br>(42.2-46.8)           | 45.3<br>(42.9-47.7) | 49.7<br>(47.1-52.4) | 48.6<br>(46.8-50.4) | 47.5<br>(46.0-49.0) | 48.4<br>(46.8-49.9) | 50.9<br>(49.9-51.9) | 47.8<br>(45.8-49.7) | -                   | .001        |                   |

|                                                    |                     |                     |                     |                     |                     |                     |                     |                     |                     |       |     |
|----------------------------------------------------|---------------------|---------------------|---------------------|---------------------|---------------------|---------------------|---------------------|---------------------|---------------------|-------|-----|
| Marginal food security                             | 44.9<br>(43.9-45.9) | 43.1<br>(40.8-45.4) | 48.6<br>(47.0-50.2) | 48.5<br>(46.0-51.0) | 46.4<br>(44.9-47.8) | 49.3<br>(47.5-51.1) | 51.6<br>(49.7-53.5) | 49.8<br>(47.8-51.7) | -                   | <.001 |     |
| Food secure                                        | 44.6<br>(43.5-45.7) | 46.1<br>(44.9-47.3) | 48.4<br>(47.2-49.5) | 47.6<br>(46.5-48.6) | 48.7<br>(47.4-50.0) | 49.9<br>(48.7-51.2) | 51.3<br>(50.4-52.2) | 50.6<br>(49.4-51.7) | -                   | <.001 |     |
| <b>Participation of Federal Nutrition Programs</b> |                     |                     |                     |                     |                     |                     |                     |                     |                     |       |     |
| SNAP                                               |                     |                     |                     |                     |                     |                     |                     |                     |                     |       | .65 |
| Yes                                                | 44.7<br>(42.9-46.6) | 45.2<br>(43.4-47.1) | 48.8<br>(47.1-50.6) | 47.4<br>(46.2-48.7) | 47.0<br>(45.4-48.6) | 49.2<br>(48.1-50.2) | 49.6<br>(48.7-50.5) | 50.1<br>(48.9-51.2) | -                   | <.001 |     |
| No                                                 | 44.6<br>(43.5-45.8) | 46.1<br>(45.0-47.3) | 48.4<br>(47.4-49.5) | 47.8<br>(46.8-48.8) | 48.5<br>(47.3-49.7) | 49.7<br>(48.5-50.8) | 52.0<br>(51.2-52.8) | 49.9<br>(48.8-51.1) | -                   | <.001 |     |
| WIC                                                |                     |                     |                     |                     |                     |                     |                     |                     |                     |       | .62 |
| Yes                                                | 47.2<br>(45.0-49.5) | 45.9<br>(43.5-48.3) | 51.7<br>(49.4-54.0) | 50.4<br>(49.6-51.2) | 49.7<br>(48.4-51.0) | 51.5<br>(49.9-53.0) | 52.8<br>(51.2-54.5) | 51.3<br>(49.3-53.2) | -                   | <.001 |     |
| No                                                 | 44.1<br>(42.9-45.4) | 46.0<br>(45.0-47.0) | 48.0<br>(46.9-49.1) | 47.3<br>(46.3-48.4) | 47.9<br>(46.7-49.1) | 49.2<br>(48.2-50.2) | 51.0<br>(50.1-51.8) | 49.7<br>(48.8-50.6) | -                   | <.001 |     |
| NSLP/SBP                                           |                     |                     |                     |                     |                     |                     |                     |                     |                     |       | .02 |
| Yes                                                | 43.5<br>(41.4-45.6) | 44.8<br>(43.4-46.3) | 48.5<br>(47.3-49.7) | 47.7<br>(46.7-48.7) | 46.4<br>(45.1-47.6) | 48.2<br>(47.3-49)   | 49.2<br>(48.3-50.1) | 49.2<br>(48-50.3)   | 47.9<br>(46.6-49.2) | <.001 |     |
| No                                                 | 45.1<br>(44.2-46.1) | 46.4<br>(45.4-47.5) | 48.5<br>(47.4-49.6) | 47.8<br>(46.7-48.9) | 48.9<br>(47.6-50.2) | 50.2<br>(49.1-51.4) | 52.3<br>(51.4-53.3) | 50.4<br>(49.2-51.5) | 50.8<br>(49.5-52.1) | <.001 |     |

Abbreviations: GED, general equivalency diploma; NHANES, National Health and Nutrition Examination Survey; SNAP, Supplemental Nutrition Assistance Program; WIC, Special Supplemental Nutrition Program for Women, Infants, and Children; NSLP, National School Lunch Program; SBP, School Breakfast Program; - indicated data not available.

<sup>a</sup> Data were weighted to be nationally representative.

*P* for trend was estimated by treating survey-cycle as a continuous variable in a survey-weighted logistic regression model. *P* for interaction was calculated using the Wald F test for an interaction term between survey-cycle and sociodemographic subgroups.

**eTable 11. Trends in Estimated Percentage of US Children With Poor or Intermediate Diet Based on Primary American Heart Association (AHA) Continuous Diet Score by Age Group, Sex, Race/Ethnicity, Parental Education, Household Income, Food Security Status, and Participation of Food Assistance Programs by NHANES Survey Cycles, 1999-2016<sup>a</sup>**

|                                                | AHA Primary Diet Score, Survey-Weighted % (95% CI) |                     |                     |                     |                     |                     |                     |                     |                     | P for trend | P for interaction |
|------------------------------------------------|----------------------------------------------------|---------------------|---------------------|---------------------|---------------------|---------------------|---------------------|---------------------|---------------------|-------------|-------------------|
|                                                | 1999-2000                                          | 2001-2002           | 2003-2004           | 2005-2006           | 2007-2008           | 2009-2010           | 2011-2012           | 2013-2014           | 2015-2016           |             |                   |
| <b>Poor Diet</b>                               |                                                    |                     |                     |                     |                     |                     |                     |                     |                     |             |                   |
| Overall                                        | 76.8<br>(72.9-80.2)                                | 74.5<br>(71.6-77.1) | 72.4<br>(68.1-76.3) | 67.2<br>(61.1-72.8) | 68.1<br>(64.6-71.4) | 63.7<br>(60.8-66.6) | 59.1<br>(55.3-62.8) | 55.9<br>(52.8-59.0) | 56.1<br>(51.4-60.7) | <.001       |                   |
| <b>Age group, y</b>                            |                                                    |                     |                     |                     |                     |                     |                     |                     |                     |             |                   |
| 2-5                                            | 63.5<br>(55.2-71.7)                                | 59.1<br>(53.4-64.9) | 53.9<br>(45.4-62.5) | 48.2<br>(42.1-54.4) | 48.8<br>(43.9-53.6) | 41.7<br>(36.4-47.1) | 41.5<br>(36.9-46.2) | 38.8<br>(34.8-42.8) | 39.8<br>(35.1-44.5) | <.001       |                   |
| 6-11                                           | 75.2<br>(71.0-78.9)                                | 73.5<br>(67.6-78.7) | 70.2<br>(63.0-76.4) | 62.0<br>(53.6-69.8) | 68.9<br>(64.3-73.0) | 61.6<br>(58.1-65.0) | 54.3<br>(47.7-60.7) | 49.1<br>(43.7-54.4) | 52.5<br>(46.4-58.5) | <.001       | .69               |
| 12-19                                          | 84.7<br>(80.1-88.4)                                | 82.5<br>(79.0-85.4) | 82.6<br>(79.3-85.5) | 79.8<br>(74.2-84.4) | 77.0<br>(72.2-81.1) | 76.2<br>(72.3-79.7) | 71.2<br>(66.7-75.3) | 68.6<br>(65.4-71.6) | 66.6<br>(61.4-71.4) | <.001       |                   |
| <b>Sex</b>                                     |                                                    |                     |                     |                     |                     |                     |                     |                     |                     |             |                   |
| Female                                         | 75.5<br>(71.9-78.8)                                | 73.9<br>(71.2-76.3) | 71.0<br>(66.6-75.0) | 66.5<br>(58.6-73.6) | 66.9<br>(61.4-72.1) | 64.4<br>(60.3-68.4) | 59.1<br>(55.9-62.3) | 54.3<br>(49.9-58.8) | 55.7<br>(50.4-60.8) | <.001       | .48               |
| Male                                           | 77.9<br>(73.0-82.2)                                | 75.1<br>(70.7-78.9) | 73.8<br>(68.6-78.3) | 67.9<br>(62.7-72.6) | 69.2<br>(65.6-72.6) | 63.1<br>(60.4-65.6) | 59.1<br>(52.7-65.2) | 57.4<br>(53.1-61.6) | 56.5<br>(51.1-61.7) | <.001       |                   |
| <b>Race/ethnicity</b>                          |                                                    |                     |                     |                     |                     |                     |                     |                     |                     |             |                   |
| Non-Hispanic white                             | 74.1<br>(68.5-78.9)                                | 73.8<br>(69.5-77.6) | 72.6<br>(65.9-78.4) | 66.4<br>(58.0-73.9) | 68.8<br>(63.2-73.8) | 64.1<br>(60.4-67.6) | 57.9<br>(52.4-63.1) | 56.7<br>(51.6-61.7) | 55.4<br>(49.7-61.0) | <.001       |                   |
| Non-Hispanic black                             | 82.3<br>(78.5-85.5)                                | 80.3<br>(76.6-83.6) | 76.4<br>(71.1-80.9) | 74.1<br>(67.8-79.5) | 71.7<br>(67.7-75.4) | 66.8<br>(57.8-74.7) | 65.9<br>(59.3-71.9) | 64.5<br>(61.5-67.4) | 60.3<br>(55.4-65.0) | <.001       | .16               |
| Mexican American                               | 75.1<br>(71.6-78.3)                                | 70.7<br>(64.4-76.2) | 71.8<br>(65.8-77.1) | 64.0<br>(60.4-67.5) | 68.5<br>(64.1-72.7) | 64.2<br>(56.8-70.9) | 61.5<br>(57.9-65.0) | 55.7<br>(50.2-61.1) | 61.0<br>(52.5-68.8) | <.001       |                   |
| <b>Parental education</b>                      |                                                    |                     |                     |                     |                     |                     |                     |                     |                     |             |                   |
| <High school                                   | 81.6<br>(75.3-86.6)                                | 80.5<br>(77.6-83.1) | 71.4<br>(64.9-77.2) | 68.7<br>(63.2-73.7) | 70.3<br>(66.7-73.7) | 67.2<br>(63.2-71.0) | 65.9<br>(59.8-71.5) | 63.5<br>(58.0-68.7) | 64.4<br>(56.9-71.2) | <.001       |                   |
| High school graduate or GED                    | 79.3<br>(73.6-84.0)                                | 78.5<br>(73.8-82.6) | 79.7<br>(73.4-84.7) | 69.6<br>(64.0-74.6) | 75.3<br>(72.5-77.9) | 71.7<br>(65.4-77.4) | 65.0<br>(58.4-71.1) | 60.5<br>(52.5-67.9) | 62.7<br>(55.5-69.5) | <.001       |                   |
| Some college                                   | 80.8<br>(76.0-84.8)                                | 73.2<br>(68.2-77.7) | 74.4<br>(70.2-78.2) | 67.5<br>(58.3-75.5) | 71.7<br>(67.7-75.4) | 62.0<br>(56.5-67.2) | 65.0<br>(59.3-70.2) | 60.2<br>(55.9-64.4) | 58.2<br>(53.5-62.7) | <.001       | .96               |
| ≥ College                                      | 63.6<br>(54.4-71.9)                                | 65.4<br>(58.8-71.5) | 57.8<br>(46.3-68.6) | 62.1<br>(52.1-71.2) | 52.8<br>(45.4-60.0) | 57.1<br>(51.6-62.4) | 42.6<br>(35.3-50.3) | 43.2<br>(37.8-48.8) | 43.2<br>(36.0-50.7) | <.001       |                   |
| <b>Ratio of family income to poverty level</b> |                                                    |                     |                     |                     |                     |                     |                     |                     |                     |             |                   |
| <1.30                                          | 76.9<br>(72.2-81.0)                                | 78.4<br>(74.2-82.1) | 72.8<br>(67.3-77.7) | 66.7<br>(60.4-72.5) | 70.3<br>(64.0-75.8) | 68.1<br>(63.3-72.5) | 64.5<br>(59.4-69.2) | 60.1<br>(54.1-65.7) | 64.5<br>(59.5-69.1) | <.001       |                   |
| 1.30-1.849                                     | 83.3<br>(76.6-88.3)                                | 76.0<br>(69.6-81.4) | 76.0<br>(65.4-84.1) | 68.3<br>(59.5-76.0) | 77.1<br>(68.7-83.7) | 63.9<br>(58.9-68.6) | 60.9<br>(52.4-68.7) | 55.9<br>(50.1-61.6) | 60.2<br>(53.3-66.7) | <.001       |                   |
| 1.85-2.99                                      | 79.1<br>(72.1-84.7)                                | 79.4<br>(75.2-83.0) | 74.4<br>(67.5-80.4) | 65.9<br>(54.9-)     | 72.9<br>(67.2-77.9) | 64.0<br>(57.2-70.2) | 68.5<br>(61.1-75.1) | 55.2<br>(45.5)      | 57.1<br>(49.0-64.9) | <.001       | .09               |
| ≥3.00                                          | 73.6<br>(66.3-79.8)                                | 68.8<br>(62.6-74.4) | 70.0<br>(63.4-75.8) | 67.9<br>(61.5-73.6) | 61.5<br>(56.1-66.6) | 60.5<br>(56.5-64.4) | 47.3<br>(38.8-55.9) | 51.5<br>(43.9-59.0) | 47.2<br>(39.4-55.3) | <.001       |                   |
| <b>Food Security Status</b>                    |                                                    |                     |                     |                     |                     |                     |                     |                     |                     |             |                   |
| Very low food security                         | 84.0<br>(77.4-88.9)                                | 73.0<br>(65.9-79.1) | 75.4<br>(61.8-85.3) | 78.2<br>(72.5-83.0) | 81.9<br>(72.7-88.5) | 62.1<br>(53.6-69.9) | 67.6<br>(58.8-75.3) | 60.9<br>(52.8-68.5) | -                   | .008        |                   |

|                                                    |                     |                     |                     |                     |                     |                     |                     |                     |                     |       |     |
|----------------------------------------------------|---------------------|---------------------|---------------------|---------------------|---------------------|---------------------|---------------------|---------------------|---------------------|-------|-----|
| Low food security                                  | 83.0<br>(71.5-90.5) | 78.6<br>(69.4-85.5) | 69.9<br>(60.0-78.3) | 68.2<br>(61.0-74.6) | 68.3<br>(62.3-73.7) | 72.3<br>(65.8-78.1) | 63.7<br>(57.9-69.1) | 65.2<br>(58.7-71.1) | -                   | <.001 | .72 |
| Marginal food security                             | 74.7<br>(63.4-83.4) | 83.1<br>(78.5-86.8) | 76.7<br>(68.3-83.4) | 67.4<br>(61.5-72.7) | 78.7<br>(73.4-83.2) | 65.8<br>(60.5-70.8) | 62.2<br>(55.1-68.9) | 58.8<br>(50.6-66.5) | -                   | <.001 |     |
| Food secure                                        | 75.6<br>(71.4-79.3) | 73.1<br>(69.9-76.1) | 71.8<br>(67.0-76.2) | 66.3<br>(59.3-72.7) | 65.8<br>(61.4-69.9) | 63.0<br>(59.9-66.0) | 56.5<br>(50.4-62.3) | 52.6<br>(48.6-56.6) | -                   | <.001 |     |
| <b>Participation of Federal Nutrition Programs</b> |                     |                     |                     |                     |                     |                     |                     |                     |                     |       |     |
| <b>SNAP</b>                                        |                     |                     |                     |                     |                     |                     |                     |                     |                     |       |     |
| Yes                                                | 77.5<br>(69.9-83.6) | 79.2<br>(73.1-84.2) | 72.4<br>(65.2-78.6) | 72.1<br>(64.1-78.8) | 73.9<br>(67.8-79.2) | 67.5<br>(62.0-72.6) | 68.0<br>(63.3-72.2) | 59.8<br>(54.7-64.7) | -                   | <.001 | .54 |
| No                                                 | 76.6<br>(72.7-80.2) | 73.6<br>(70.8-76.3) | 72.4<br>(68.0-76.4) | 66.3<br>(60.0-72.0) | 66.5<br>(62.1-70.6) | 62.6<br>(58.9-66.1) | 55.1<br>(50.1-60.0) | 54.4<br>(50.4-58.4) | -                   | <.001 |     |
| <b>WIC</b>                                         |                     |                     |                     |                     |                     |                     |                     |                     |                     |       |     |
| Yes                                                | 67.7<br>(57.0-76.8) | 72.7<br>(66.4-78.2) | 67.0<br>(57.1-75.5) | 61.6<br>(56.1-66.9) | 65.4<br>(60.5-70.0) | 60.1<br>(53.3-66.6) | 55.6<br>(48.0-62.9) | 54.4<br>(46.9-61.8) | -                   | <.001 | .29 |
| No                                                 | 78.5<br>(74.6-82.0) | 74.8<br>(72.0-77.3) | 73.3<br>(68.5-77.6) | 68.1<br>(61.3-74.2) | 68.5<br>(64.3-72.5) | 64.4<br>(61.4-67.3) | 59.9<br>(55.1-64.5) | 56.2<br>(52.6-59.7) | -                   | <.001 |     |
| <b>NSLP/SBP</b>                                    |                     |                     |                     |                     |                     |                     |                     |                     |                     |       |     |
| Yes                                                | 79.7<br>(72.5-85.4) | 79.6<br>(75.3-83.2) | 76.7<br>(70.9-81.7) | 67.7<br>(61.9-73.0) | 75.5<br>(71.3-79.3) | 71.2<br>(66.9-75.2) | 66.3<br>(61.9-70.4) | 58.9<br>(53.8-63.8) | 64.7<br>(60.1-69.1) | <.001 | .18 |
| No                                                 | 75.5<br>(70.9-79.6) | 72.5<br>(69.2-75.7) | 70.8<br>(66.0-75.2) | 67.1<br>(60.3-73.1) | 65.1<br>(61.0-69.0) | 60.2<br>(56.6-63.7) | 55.4<br>(50.6-60.2) | 54.3<br>(49.9-58.7) | 50.5<br>(45.5-55.5) | <.001 |     |
| <b>Intermediate Diet</b>                           |                     |                     |                     |                     |                     |                     |                     |                     |                     |       |     |
| Overall                                            | 23.2<br>(19.8-26.9) | 25.4<br>(22.8-28.1) | 27.4<br>(23.6-31.6) | 32.7<br>(27.1-38.8) | 31.7<br>(28.5-35.1) | 36.1<br>(33.3-39.0) | 40.4<br>(36.6-44.3) | 43.6<br>(40.4-46.9) | 43.7<br>(39.1-48.3) | <.001 |     |
| <b>Age group, y</b>                                |                     |                     |                     |                     |                     |                     |                     |                     |                     |       |     |
| 2-5                                                | 36.2<br>(28.5-44.8) | 40.8<br>(35.1-46.6) | 45.5<br>(37.3-54.0) | 51.7<br>(45.6-57.8) | 51.0<br>(46.2-55.9) | 58.1<br>(52.6-63.4) | 58.2<br>(53.3-62.9) | 59.9<br>(55.7-64.0) | 60.2<br>(55.5-64.8) | <.001 | .67 |
| 6-11                                               | 24.8<br>(21.1-29.0) | 26.1<br>(21.4-31.5) | 29.7<br>(23.4-36.8) | 37.8<br>(30.0-46.3) | 31.0<br>(26.9-35.4) | 38.0<br>(34.5-41.6) | 44.8<br>(38.6-51.3) | 50.8<br>(45.4-56.1) | 47.3<br>(41.2-53.5) | <.001 |     |
| 12-19                                              | 15.3<br>(11.6-19.9) | 17.5<br>(14.5-20.9) | 17.3<br>(14.5-20.5) | 20.2<br>(15.6-25.7) | 22.8<br>(18.9-27.2) | 23.8<br>(20.3-27.7) | 28.5<br>(24.2-33.2) | 31.2<br>(28.2-34.4) | 33.0<br>(28.3-38.1) | <.001 |     |
| <b>Sex</b>                                         |                     |                     |                     |                     |                     |                     |                     |                     |                     |       |     |
| Female                                             | 24.5<br>(21.2-28.0) | 26.1<br>(23.6-28.8) | 28.8<br>(24.9-33.0) | 33.3<br>(26.2-41.3) | 33.1<br>(27.9-38.6) | 35.6<br>(31.6-39.7) | 40.7<br>(37.5-43.9) | 45.4<br>(40.8-50.0) | 44.1<br>(39.0-49.3) | <.001 | .52 |
| Male                                               | 21.9<br>(17.7-26.7) | 24.7<br>(20.9-28.8) | 26.1<br>(21.6-31.2) | 32.1<br>(27.3-37.3) | 30.4<br>(27.1-33.8) | 36.6<br>(34.2-39.1) | 40.1<br>(34.0-46.5) | 42.0<br>(37.6-46.5) | 43.2<br>(38.0-48.6) | <.001 |     |
| <b>Race/ethnicity</b>                              |                     |                     |                     |                     |                     |                     |                     |                     |                     |       |     |
| Non-Hispanic white                                 | 25.8<br>(21.0-31.3) | 26.0<br>(22.3-30.0) | 27.4<br>(21.6-34.1) | 33.5<br>(26.0-41.9) | 31.0<br>(26.1-36.5) | 35.6<br>(32.2-39.2) | 41.7<br>(36.4-47.2) | 42.7<br>(37.5-48.1) | 44.5<br>(38.8-50.2) | <.001 | .16 |
| Non-Hispanic black                                 | 17.7<br>(14.5-21.5) | 19.6<br>(16.4-23.3) | 23.6<br>(19.0-28.8) | 25.8<br>(20.4-32.1) | 28.2<br>(24.5-32.1) | 33.2<br>(25.3-42.1) | 33.8<br>(27.7-40.4) | 35.2<br>(32.4-38.2) | 39.7<br>(35.0-44.5) | <.001 |     |
| Mexican American                                   | 24.9<br>(21.7-28.4) | 29.3<br>(23.7-35.5) | 27.0<br>(22.6-31.9) | 35.6<br>(31.9-39.5) | 31.5<br>(27.3-35.9) | 35.8<br>(29.1-43.2) | 37.6<br>(33.8-41.7) | 44.0<br>(38.9-49.3) | 38.7<br>(31.0-46.9) | .001  |     |
| <b>Parental education</b>                          |                     |                     |                     |                     |                     |                     |                     |                     |                     |       |     |
| <High school                                       | 18.4<br>(13.4-24.6) | 19.5<br>(16.9-22.4) | 27.9<br>(22.4-34.1) | 31.3<br>(26.3-36.8) | 29.6<br>(26.3-33.0) | 32.8<br>(28.9-36.8) | 33.5<br>(28.0-39.5) | 36.0<br>(31.0-41.3) | 35.0<br>(28.3-42.4) | <.001 |     |
| High school graduate or GED                        | 20.7<br>(16.0-26.4) | 21.4<br>(17.3-26.2) | 20.2<br>(15.1-26.5) | 30.2<br>(25.1-35.9) | 24.7<br>(22.1-27.5) | 28.3<br>(22.6-34.6) | 34.9<br>(28.9-41.6) | 39.2<br>(31.7-47.3) | 37.3<br>(30.5-44.5) | <.001 | .95 |

|                                                    |                     |                     |                     |                     |                     |                     |                     |                     |                     |       |     |
|----------------------------------------------------|---------------------|---------------------|---------------------|---------------------|---------------------|---------------------|---------------------|---------------------|---------------------|-------|-----|
| Some college                                       | 19.2<br>(15.2-24.0) | 26.2<br>(21.8-31.2) | 25.6<br>(21.8-29.8) | 32.5<br>(24.5-41.7) | 28.2<br>(24.6-32.2) | 37.8<br>(32.8-42.9) | 34.6<br>(29.2-40.4) | 39.2<br>(35.1-43.4) | 41.7<br>(37.2-46.4) | <.001 |     |
| ≥ College                                          | 36.4<br>(28.0-45.6) | 34.6<br>(28.5-41.2) | 42.1<br>(31.4-53.6) | 37.8<br>(28.7-47.7) | 46.6<br>(39.5-53.7) | 42.6<br>(37.3-48.1) | 56.4<br>(48.8-63.7) | 56.5<br>(50.8-61.9) | 56.5<br>(49.1-63.5) | <.001 |     |
| <b>Ratio of family income to poverty level</b>     |                     |                     |                     |                     |                     |                     |                     |                     |                     |       |     |
| <1.30                                              | 22.9<br>(18.9-27.4) | 21.5<br>(17.8-25.7) | 26.7<br>(22.0-31.9) | 33.1<br>(27.2-39.5) | 29.4<br>(24.3-35.0) | 31.9<br>(27.5-36.7) | 35.3<br>(30.4-40.5) | 39.5<br>(33.6-45.8) | 35.4<br>(30.8-40.2) | .004  |     |
| 1.30-1.849                                         | 16.7<br>(11.7-23.3) | 24.0<br>(18.5-30.4) | 23.9<br>(15.8-34.4) | 31.7<br>(24.0-40.5) | 22.7<br>(16.1-30.9) | 35.7<br>(30.6-41.1) | 38.0<br>(30.1-46.7) | 44.1<br>(38.4-49.9) | 39.8<br>(33.2-46.7) | <.001 | .11 |
| 1.85-2.99                                          | 20.8<br>(15.2-27.8) | 20.5<br>(16.9-24.7) | 25.5<br>(19.6-32.5) | 34.0<br>(24.5-45.1) | 26.7<br>(21.8-32.2) | 36.0<br>(29.7-42.8) | 31.4<br>(24.8-38.9) | 43.6<br>(34.8-52.8) | 42.4<br>(34.6-50.5) | .015  |     |
| ≥3.00                                              | 26.4<br>(20.2-33.7) | 30.8<br>(25.6-36.6) | 30.0<br>(24.1-36.6) | 32.0<br>(26.3-38.4) | 38.5<br>(33.4-43.8) | 39.3<br>(35.5-43.3) | 51.8<br>(43.0-60.4) | 48.4<br>(40.8-56.0) | 52.5<br>(44.6-60.3) | <.001 |     |
| <b>Food Security Status</b>                        |                     |                     |                     |                     |                     |                     |                     |                     |                     |       |     |
| Very low food security                             | 16.0<br>(11.1-22.6) | 26.9<br>(20.9-33.9) | 24.6<br>(14.6-38.2) | 21.8<br>(17.0-27.5) | 18.1<br>(11.5-27.3) | 37.9<br>(30.0-46.3) | 31.2<br>(23.4-40.2) | 39.1<br>(31.5-47.2) | -                   | <.001 |     |
| Low food security                                  | 17.0<br>(9.47-28.5) | 21.4<br>(14.4-30.6) | 28.8<br>(20.8-38.3) | 31.8<br>(25.4-38.9) | 31.6<br>(26.2-37.5) | 27.7<br>(21.9-34.2) | 36.1<br>(30.5-42.0) | 34.6<br>(28.8-40.8) | -                   | <.001 | .76 |
| Marginal food security                             | 25.3<br>(16.6-36.6) | 16.9<br>(13.2-21.5) | 23.3<br>(16.6-31.7) | 32.6<br>(27.2-38.5) | 21.0<br>(16.4-26.5) | 34.2<br>(29.2-39.5) | 37.4<br>(30.7-44.5) | 41.2<br>(33.4-49.4) | -                   | <.001 |     |
| Food secure                                        | 24.3<br>(20.6-28.4) | 26.7<br>(23.9-29.7) | 28.1<br>(23.7-32.9) | 33.6<br>(27.2-40.6) | 34.0<br>(30.0-38.3) | 36.9<br>(33.8-40.0) | 43.0<br>(37.1-49.1) | 46.8<br>(42.8-50.9) | -                   | <.001 |     |
| <b>Participation of Federal Nutrition Programs</b> |                     |                     |                     |                     |                     |                     |                     |                     |                     |       |     |
| <b>SNAP</b>                                        |                     |                     |                     |                     |                     |                     |                     |                     |                     |       | .65 |
| Yes                                                | 22.1<br>(16.1-29.5) | 20.7<br>(15.6-26.8) | 26.8<br>(20.8-33.7) | 27.9<br>(21.2-35.8) | 26.1<br>(20.7-32.2) | 32.5<br>(27.4-38.0) | 31.9<br>(27.6-36.5) | 39.8<br>(34.5-45.3) | -                   | <.001 |     |
| No                                                 | 23.4<br>(19.8-27.3) | 26.2<br>(23.6-28.9) | 27.5<br>(23.5-31.9) | 33.6<br>(27.9-39.9) | 33.3<br>(29.3-37.5) | 37.2<br>(33.8-40.8) | 44.2<br>(39.2-49.3) | 45.1<br>(41.0-49.3) | -                   | <.001 |     |
| <b>WIC</b>                                         |                     |                     |                     |                     |                     |                     |                     |                     |                     |       |     |
| Yes                                                | 31.9<br>(23.1-42.1) | 27.2<br>(21.6-33.5) | 31.9<br>(23.6-41.6) | 38.0<br>(32.6-43.7) | 34.2<br>(29.6-39.2) | 39.9<br>(33.4-46.7) | 43.5<br>(36.2-51.1) | 44.8<br>(36.9-53.0) | -                   | <.001 | .30 |
| No                                                 | 21.5<br>(18.0-25.4) | 25.1<br>(22.6-27.8) | 26.7<br>(22.4-31.5) | 31.9<br>(25.7-38.7) | 31.3<br>(27.5-35.4) | 35.4<br>(32.6-38.3) | 39.7<br>(35.2-44.4) | 43.4<br>(39.9-47.0) | -                   | <.001 |     |
| <b>NSLP/SBP</b>                                    |                     |                     |                     |                     |                     |                     |                     |                     |                     |       |     |
| Yes                                                | 20.3<br>(14.6-27.5) | 20.4<br>(16.7-24.6) | 23.2<br>(18.2-28.9) | 32.1<br>(26.6-38.1) | 24.5<br>(20.7-28.6) | 28.8<br>(24.8-33.1) | 33.2<br>(29.0-37.7) | 40.9<br>(35.9-46.1) | 34.9<br>(30.6-39.4) | <.001 | .17 |
| No                                                 | 24.4<br>(20.3-29.0) | 27.3<br>(24.3-30.5) | 29.0<br>(24.6-33.7) | 32.9<br>(26.8-39.6) | 34.6<br>(30.8-38.6) | 39.5<br>(36.1-43.0) | 44.1<br>(39.3-49.0) | 45.1<br>(40.7-49.6) | 49.3<br>(44.4-54.3) | <.001 |     |

Abbreviations: GED, general equivalency diploma; NHANES, National Health and Nutrition Examination Survey; SNAP, Supplemental Nutrition Assistance Program; WIC, Special Supplemental Nutrition Program for Women, Infants, and Children; NSLP, National School Lunch Program; SBP, School Breakfast Program; - indicated data not available.

<sup>a</sup> Data were weighted to be nationally representative.

*P* for trend was estimated by treating survey-cycle as a continuous variable in a survey-weighted logistic regression model. *P* for interaction was calculated using the Wald F test for an interaction term between survey-cycle and sociodemographic subgroups.

**eTable 12. Trends in Estimated Percentage of US Children With Poor or Intermediate Diet Based on Secondary American Heart Association (AHA) Continuous Diet Score by Age Group, Sex, Race/Ethnicity, Parental Education, Household Income, Food Security Status, and Participation of Food Assistance Programs by NHANES Survey Cycles, 1999-2016<sup>a</sup>**

|                                                | AHA Secondary Diet Score, Survey-Weighted % (95% CI) |                     |                     |                     |                     |                     |                     |                     |                     | P for trend | P for interaction |
|------------------------------------------------|------------------------------------------------------|---------------------|---------------------|---------------------|---------------------|---------------------|---------------------|---------------------|---------------------|-------------|-------------------|
|                                                | 1999-2000                                            | 2001-2002           | 2003-2004           | 2005-2006           | 2007-2008           | 2009-2010           | 2011-2012           | 2013-2014           | 2015-2016           |             |                   |
| <b>Poor Diet</b>                               |                                                      |                     |                     |                     |                     |                     |                     |                     |                     |             |                   |
| Overall                                        | 61.0<br>(56.5-65.2)                                  | 57.7<br>(54.7-60.7) | 58.2<br>(54.5-61.9) | 53.3<br>(48.8-57.8) | 53.8<br>(49.3-58.3) | 48.2<br>(45.6-50.8) | 48.3<br>(45.0-51.6) | 46.6<br>(43.3-49.9) | 49.1<br>(45.0-53.3) | <.001       |                   |
| <b>Age group, y</b>                            |                                                      |                     |                     |                     |                     |                     |                     |                     |                     |             |                   |
| 2-5                                            | 47.1<br>(38.3-56.0)                                  | 45.4<br>(40.4-50.4) | 45.7<br>(40.0-51.8) | 34.7<br>(28.7-41.3) | 41.1<br>(35.7-46.8) | 35.6<br>(31.3-40.2) | 35.4<br>(30.8-40.2) | 35.3<br>(30.3-40.8) | 36.6<br>(31.2-42.3) | <.001       |                   |
| 6-11                                           | 61.7<br>(56.9-66.3)                                  | 55.3<br>(49.4-61.1) | 55.1<br>(50.9-59.1) | 49.0<br>(43.5-54.6) | 55.1<br>(49.8-60.3) | 44.6<br>(41.6-47.7) | 46.2<br>(41.3-51.1) | 42.4<br>(35.8-49.2) | 48.5<br>(42.7-54.4) | <.001       | .80               |
| 12-19                                          | 67.3<br>(61.7-72.5)                                  | 65.5<br>(61.9-68.9) | 66.4<br>(61.9-70.6) | 65.1<br>(60.0-70.0) | 59.1<br>(52.6-65.4) | 57.0<br>(52.6-61.3) | 56.2<br>(51.4-60.8) | 54.7<br>(50.9-58.4) | 55.6<br>(50.4-60.6) | <.001       |                   |
| <b>Sex</b>                                     |                                                      |                     |                     |                     |                     |                     |                     |                     |                     |             |                   |
| Female                                         | 57.5<br>(53.0-61.8)                                  | 54.4<br>(51.5-57.3) | 57.2<br>(51.7-62.4) | 51.9<br>(3.2)       | 50.8<br>(46.7-54.8) | 47.5<br>(43.5-51.7) | 45.8<br>(41.1-50.5) | 42.5<br>(38.8-46.2) | 47.0<br>(41.1-51.9) | <.001       | .85               |
| Male                                           | 64.3<br>(59.0-69.3)                                  | 61.1<br>(55.9-66.0) | 59.3<br>(55.2-63.2) | 54.8<br>(51.1-58.4) | 56.9<br>(50.3-63.2) | 48.8<br>(46.3-51.3) | 50.7<br>(46.0-54.9) | 50.5<br>(46.0-54.9) | 51.2<br>(46.0-56.4) | .03         |                   |
| <b>Race/ethnicity</b>                          |                                                      |                     |                     |                     |                     |                     |                     |                     |                     |             |                   |
| Non-Hispanic white                             | 59.2<br>(53.3-64.8)                                  | 57.4<br>(52.9-61.7) | 60.3<br>(54.9-65.4) | 53.7<br>(47.6-59.7) | 54.1<br>(47.1-60.9) | 49.1<br>(44.5-53.6) | 49.0<br>(43.9-54.1) | 49.6<br>(44.0-55.2) | 49.8<br>(44.2-55.3) | <.001       |                   |
| Non-Hispanic black                             | 66.6<br>(60.0-69.6)                                  | 64.9<br>(60.0-69.6) | 62.1<br>(58.2-65.8) | 61.6<br>(55.4-67.4) | 63.6<br>(59.9-67.2) | 53.0<br>(48.5-57.5) | 55.4<br>(48.8-61.8) | 52.2<br>(47.4-56.9) | 56.8<br>(50.8-62.6) | <.001       | .68               |
| Mexican American                               | 57.6<br>(53.6-61.5)                                  | 55.1<br>(50.2-59.9) | 52.7<br>(46.2-59.0) | 43.9<br>(41.6-46.1) | 50.3<br>(46.2-54.4) | 46.7<br>(39.0-54.5) | 45.4<br>(40.9-50.0) | 42.6<br>(39.2-46.1) | 49.1<br>(42.7-55.5) | .001        |                   |
| <b>Parental education</b>                      |                                                      |                     |                     |                     |                     |                     |                     |                     |                     |             |                   |
| <High school                                   | 69.4<br>(63.9-74.3)                                  | 65.5<br>(61.7-69.1) | 58.6<br>(51.6-65.1) | 52.4<br>(47.5-57.2) | 57.9<br>(52.1-63.5) | 48.2<br>(43.4-53.0) | 52.9<br>(46.9-58.8) | 50.1<br>(46.2-53.9) | 51.5<br>(43.2-59.7) | <.001       |                   |
| High school graduate or GED                    | 65.6<br>(60.7-70.2)                                  | 61.7<br>(57.0-66.2) | 65.1<br>(59.4-70.4) | 55.3<br>(50.3-60.1) | 61.1<br>(56.4-65.6) | 55.0<br>(49.5-60.4) | 56.1<br>(49.1-62.8) | 49.9<br>(43.5-56.2) | 58.2<br>(50.9-65.1) | <.001       | .21               |
| Some college                                   | 61.5<br>(55.1-67.5)                                  | 58.0<br>(53.6-62.3) | 59.2<br>(55.2-63.1) | 53.9<br>(45.3-62.4) | 55.4<br>(49.0-61.7) | 49.0<br>(42.4-55.6) | 51.3<br>(46.7-55.8) | 47.9<br>(43.2-52.8) | 50.3<br>(46.0-54.6) | <.001       |                   |
| ≥ College                                      | 45.7<br>(40.7-50.9)                                  | 46.4<br>(41.0-51.8) | 45.2<br>(36.4-54.4) | 50.2<br>(40.6-59.8) | 43.4<br>(35.9-51.1) | 43.1<br>(38.6-47.6) | 35.3<br>(28.7-42.4) | 38.9<br>(31.3-47.1) | 39.4<br>(32.3-46.9) | .006        |                   |
| <b>Ratio of family income to poverty level</b> |                                                      |                     |                     |                     |                     |                     |                     |                     |                     |             |                   |
| <1.30                                          | 64.9<br>(59.7-69.8)                                  | 62.7<br>(57.8-67.4) | 57.9<br>(51.3-64.2) | 52.0<br>(45.1-58.7) | 56.6<br>(50.5-62.4) | 54.8<br>(50.7-58.7) | 52.6<br>(47.9-57.2) | 46.8<br>(41.8-51.9) | 56.2<br>(49.8-62.3) | <.001       |                   |
| 1.30-1.849                                     | 69.8<br>(62.5-76.3)                                  | 62.1<br>(55.4-68.4) | 67.5<br>(58.6-75.3) | 50.4<br>(42.1-58.7) | 57.6<br>(51.4-63.4) | 48.5<br>(43.3-53.8) | 55.0<br>(49.7-60.1) | 44.0<br>(37.8-50.4) | 54.2<br>(47.1-61.0) | <.001       | .34               |
| 1.85-2.99                                      | 58.2<br>(51.6)                                       | 59.4<br>(54.0-64.6) | 60.3<br>(53.8-66.5) | 52.6<br>(44.1-60.9) | 57.1<br>(50.4-63.5) | 45.9<br>(38.8-53.1) | 57.5<br>(49.7-64.9) | 50.1<br>(43.3-56.9) | 49.6<br>(43.6-55.7) | .003        |                   |
| ≥3.00                                          | 54.3<br>(47.9-60.6)                                  | 51.1<br>(46.6-55.5) | 55.6<br>(50.4-60.7) | 55.4<br>(50.8-60.0) | 49.0<br>(44.0-53.9) | 45.0<br>(41.7-48.3) | 36.6<br>(29.3-44.6) | 44.7<br>(37.3-52.4) | 42.3<br>(33.4-51.8) | <.001       |                   |
| <b>Food Security Status</b>                    |                                                      |                     |                     |                     |                     |                     |                     |                     |                     |             |                   |

|                                                    |                     |                     |                     |                     |                     |                     |                     |                     |                     |       |      |
|----------------------------------------------------|---------------------|---------------------|---------------------|---------------------|---------------------|---------------------|---------------------|---------------------|---------------------|-------|------|
| Very low food security                             | 61.6<br>(51.1-71.1) | 55.8<br>(43.6-67.4) | 60.4<br>(51.0-69.1) | 65.1<br>(56.0-73.1) | 64.3<br>(54.5-73.1) | 53.6<br>(46.0-61.0) | 58.0<br>(50.1-65.5) | 55.6<br>(48.2-62.7) | -                   | .40   |      |
| Low food security                                  | 68.0<br>(59.2-75.7) | 61.8<br>(52.6-70.3) | 57.7<br>(46.1-68.4) | 51.2<br>(44.0-58.4) | 54.8<br>(49.2-60.3) | 55.2<br>(48.1-62.1) | 52.4<br>(46.5-58.3) | 52.6<br>(46.1-59.1) | -                   | .003  | .008 |
| Marginal food security                             | 66.9<br>(58.4-74.4) | 68.0<br>(60.4-74.7) | 61.8<br>(51.9-70.8) | 55.5<br>(47.9-62.7) | 60.4<br>(52.8-67.6) | 47.8<br>(42.2-53.4) | 44.7<br>(38.0-51.5) | 47.2<br>(40.4-54.1) | -                   | <.001 |      |
| Food secure                                        | 59.2<br>(55.0-63.2) | 56.3<br>(53.2-59.3) | 57.9<br>(54.3-61.4) | 52.7<br>(47.3-58.0) | 52.3<br>(46.7-57.8) | 47.2<br>(44.5-50.0) | 46.8<br>(42.4-51.2) | 43.9<br>(39.2-48.7) | -                   | <.001 |      |
| <b>Participation of Federal Nutrition Programs</b> |                     |                     |                     |                     |                     |                     |                     |                     |                     |       |      |
| <b>SNAP</b>                                        |                     |                     |                     |                     |                     |                     |                     |                     |                     |       |      |
| Yes                                                | 67.3<br>(60.1-73.8) | 62.8<br>(54.5-70.4) | 57.6<br>(51.3-63.6) | 56.5<br>(47.9-64.7) | 60.9<br>(3.2)       | 52.7<br>(48.4-57.0) | 57.1<br>(51.5-62.6) | 46.1<br>(41.0-51.2) | -                   | <.001 | .31  |
| No                                                 | 59.7<br>(54.9-64.3) | 56.9<br>(53.9-59.8) | 58.4<br>(54.6-62.1) | 52.7<br>(48.3-57.1) | 51.9<br>(47.1-56.6) | 46.8<br>(43.7-49.9) | 44.3<br>(39.7-49.1) | 46.8<br>(42.7-50.9) | -                   | <.001 |      |
| <b>WIC</b>                                         |                     |                     |                     |                     |                     |                     |                     |                     |                     |       |      |
| Yes                                                | 59.0<br>(47.3-69.7) | 58.3<br>(53.6-62.8) | 52.5<br>(44.7-60.2) | 44.2<br>(38.2-50.4) | 54.5<br>(49.4-59.6) | 45.3<br>(39.4-51.3) | 45.2<br>(38.2-52.2) | 44.8<br>(36.4-53.4) | -                   | .003  | .61  |
| No                                                 | 61.4<br>(57.0-65.5) | 57.6<br>(54.5-60.7) | 59.2<br>(55.4-62.8) | 54.8<br>(49.9-59.5) | 53.7<br>(48.4-58.9) | 48.7<br>(46.2-51.3) | 49.0<br>(44.7-53.3) | 46.9<br>(43.6-50.2) | -                   | <.001 |      |
| <b>NSLP/SBP</b>                                    |                     |                     |                     |                     |                     |                     |                     |                     |                     |       |      |
| Yes                                                | 67.4<br>(62.2-72.2) | 61.2<br>(55.5-66.5) | 59.7<br>(53.7-65.5) | 55.1<br>(49.3-60.8) | 61.7<br>(56.0-67.0) | 53.6<br>(49.9-57.2) | 56.2<br>(51.7-60.6) | 47.9<br>(43.7-52.1) | 56.2<br>(52.1-60.2) | <.001 | .22  |
| No                                                 | 58.1<br>(53.2-62.9) | 56.5<br>(53.4-59.5) | 57.7<br>(53.8-61.5) | 52.7<br>(47.5-57.9) | 50.7<br>(46.0-55.4) | 45.7<br>(42.8-48.7) | 44.2<br>(39.9-48.6) | 45.9<br>(41.3-50.5) | 44.6<br>(39.1-50.2) | <.001 |      |
| <b>Intermediate Diet</b>                           |                     |                     |                     |                     |                     |                     |                     |                     |                     |       |      |
| Overall                                            | 39.0<br>(34.7-43.4) | 42.0<br>(39.1-45.1) | 41.5<br>(38.0-45.0) | 46.6<br>(42.1-51.1) | 45.9<br>(41.4-50.4) | 51.4<br>(48.7-54.0) | 51.5<br>(48.2-54.8) | 52.9<br>(49.5-56.1) | 50.4<br>(46.3-54.4) | <.001 |      |
| <b>Age group, y</b>                                |                     |                     |                     |                     |                     |                     |                     |                     |                     |       | .66  |
| 2-5                                                | 52.9<br>(43.9-61.6) | 53.9<br>(49.4-58.4) | 53.8<br>(47.9-59.7) | 65.2<br>(58.6-71.2) | 58.5<br>(52.8-64.1) | 63.1<br>(58.9-67.2) | 64.5<br>(59.1-69.6) | 63.2<br>(58.6-67.5) | 62.4<br>(56.2-68.2) | .001  |      |
| 6-11                                               | 38.3<br>(33.6-43.1) | 44.7<br>(38.9-50.5) | 44.8<br>(40.8-48.8) | 50.8<br>(45.2-56.4) | 44.8<br>(39.5-50.1) | 55.0<br>(52.0-57.9) | 53.8<br>(48.9-58.6) | 57.4<br>(50.6-64.0) | 51.3<br>(45.4-57.1) | <.001 |      |
| 12-19                                              | 32.6<br>(27.5-38.2) | 34.4<br>(31.0-37.9) | 33.3<br>(29.3-37.6) | 34.8<br>(30.0-40.0) | 40.5<br>(34.3-47.1) | 43.0<br>(38.6-47.3) | 43.4<br>(38.7-48.2) | 44.9<br>(41.1-48.7) | 43.9<br>(38.9-49.0) | <.001 |      |
| <b>Sex</b>                                         |                     |                     |                     |                     |                     |                     |                     |                     |                     |       |      |
| Female                                             | 42.5<br>(38.2-46.9) | 45.2<br>(42.2-48.2) | 42.3<br>(37.5-47.2) | 48.0<br>(41.7-54.3) | 48.9<br>(44.8-53.0) | 52.2<br>(48.0-56.3) | 54.2<br>(49.5-58.8) | 57.3<br>(53.4-61.0) | 52.4<br>(47.4-57.3) | <.001 |      |
| Male                                               | 35.7<br>(30.6-41.0) | 38.9<br>(34.0-44.1) | 40.7<br>(36.8-44.7) | 45.2<br>(41.6-48.9) | 42.9<br>(36.7-49.4) | 50.6<br>(48.0-53.2) | 48.9<br>(44.1-53.7) | 48.7<br>(44.3-53.0) | 48.4<br>(43.4-53.4) | <.001 |      |
| <b>Race/ethnicity</b>                              |                     |                     |                     |                     |                     |                     |                     |                     |                     |       |      |
| Non-Hispanic white                                 | 40.7<br>(35.2-46.6) | 42.3<br>(38.0-46.7) | 39.5<br>(34.5-44.7) | 46.3<br>(40.3-52.3) | 45.8<br>(39.0-52.8) | 50.3<br>(45.8-54.9) | 50.9<br>(45.8-55.9) | 49.9<br>(44.2-55.6) | 49.5<br>(43.9-55.1) | <.001 | .69  |
| Non-Hispanic black                                 | 33.4<br>(28.7-38.4) | 34.9<br>(30.3-39.8) | 37.9<br>(34.2-41.8) | 38.3<br>(32.5-44.5) | 36.4<br>(32.8-40.1) | 46.8<br>(42.4-51.3) | 44.5<br>(38.2-51.1) | 47.5<br>(42.7-52.2) | 43.2<br>(37.4-49.2) | <.001 |      |
| Mexican American                                   | 42.4<br>(38.5-46.4) | 44.9<br>(40.1-49.8) | 46.3<br>(40.4-52.2) | 55.7<br>(53.5-58.0) | 49.3<br>(45.0-53.6) | 53.0<br>(45.2-60.6) | 54.5<br>(50.0-59.0) | 57.0<br>(53.5-60.4) | 50.7<br>(44.4-56.9) | .001  |      |
| <b>Parental education</b>                          |                     |                     |                     |                     |                     |                     |                     |                     |                     |       |      |



|                                                    |                     |                     |                     |                     |                     |                     |                     |                     |                     |       |      |
|----------------------------------------------------|---------------------|---------------------|---------------------|---------------------|---------------------|---------------------|---------------------|---------------------|---------------------|-------|------|
| <High school                                       | 30.6<br>(25.7-36.1) | 34.5<br>(30.8-38.3) | 40.8<br>(34.6-47.4) | 47.6<br>(42.7-52.4) | 41.8<br>(36.3-47.6) | 51.6<br>(46.8-56.3) | 47.1<br>(41.2-53.1) | 49.3<br>(45.7-52.9) | 48.1<br>(40.1-56.3) | <.001 | .18  |
| High school graduate or GED                        | 34.4<br>(29.8-39.3) | 37.7<br>(32.8-42.7) | 34.7<br>(29.4-40.5) | 44.5<br>(39.6-49.5) | 38.9<br>(34.4-43.6) | 44.9<br>(39.6-50.5) | 43.8<br>(37.0-50.8) | 50.0<br>(43.6-56.3) | 41.8<br>(34.9-49.1) | <.001 |      |
| Some college                                       | 38.4<br>(32.4-44.8) | 42.0<br>(37.7-46.4) | 40.7<br>(36.8-44.8) | 46.0<br>(37.6-54.7) | 44.2<br>(38.0-50.6) | 50.4<br>(43.3-57.4) | 48.6<br>(44.1-53.2) | 51.1<br>(46.7-55.6) | 49.6<br>(45.3-53.9) | <.001 |      |
| ≥ College                                          | 54.3<br>(49.1-59.3) | 53.4<br>(47.8-58.9) | 54.0<br>(44.8-62.9) | 49.7<br>(40.1-59.2) | 56.1<br>(48.3-63.7) | 56.3<br>(51.9-60.6) | 64.1<br>(56.7-70.8) | 60.6<br>(52.5-68.2) | 59.1<br>(51.9-65.9) | .01   |      |
| <b>Ratio of family income to poverty level</b>     |                     |                     |                     |                     |                     |                     |                     |                     |                     |       |      |
| <1.30                                              | 35.0<br>(30.1-40.2) | 37.3<br>(32.6-42.2) | 41.7<br>(35.6-48.0) | 47.8<br>(40.9-54.8) | 43.3<br>(37.3-49.4) | 45.2<br>(41.2-49.2) | 47.3<br>(42.7-52.0) | 52.8<br>(47.6-57.9) | 43.7<br>(37.7-49.9) | <.001 | .27  |
| 1.30-1.849                                         | 30.1<br>(23.6-37.4) | 37.9<br>(31.6-44.6) | 32.5<br>(24.7-41.4) | 49.6<br>(41.2-57.9) | 42.4<br>(36.5-48.5) | 50.1<br>(44.3-55.9) | 45.0<br>(39.9-50.2) | 56.0<br>(49.6-62.2) | 45.8<br>(39.0-52.9) | <.001 |      |
| 1.85-2.99                                          | 41.8<br>(35.4-48.4) | 40.6<br>(35.4-46.0) | 39.6<br>(33.5-46.1) | 47.4<br>(39.0-55.8) | 42.1<br>(36.0-48.4) | 54.0<br>(46.8-61.1) | 42.5<br>(35.1-50.3) | 48.4<br>(42.1-54.8) | 49.6<br>(43.4-55.8) | .008  |      |
| ≥3.00                                              | 45.7<br>(39.4-52.1) | 48.4<br>(43.6-53.2) | 44.0<br>(39.0-49.2) | 44.5<br>(39.9-49.1) | 50.8<br>(45.7-55.9) | 54.5<br>(50.6-58.3) | 62.8<br>(54.6-70.3) | 54.9<br>(47.2-62.3) | 56.7<br>(47.7-65.3) | <.001 |      |
| <b>Food Security Status</b>                        |                     |                     |                     |                     |                     |                     |                     |                     |                     |       |      |
| Very low food security                             | 38.4<br>(28.9-48.9) | 44.2<br>(32.6-56.4) | 39.6<br>(30.9-49.0) | 34.8<br>(26.8-43.8) | 35.7<br>(26.9-45.5) | 46.4<br>(39.0-54.0) | 41.9<br>(34.4-49.8) | 44.4<br>(37.2-51.8) | -                   | .40   |      |
| Low food security                                  | 32.0<br>(24.3-40.8) | 38.2<br>(29.7-47.3) | 41.3<br>(31.1-52.3) | 48.8<br>(41.6-56.0) | 44.4<br>(38.9-50.0) | 44.8<br>(37.8-51.9) | 47.5<br>(41.6-53.4) | 46.9<br>(40.7-53.2) | -                   | <.001 | .008 |
| Marginal food security                             | 33.1<br>(25.6-41.6) | 31.8<br>(25.1-39.3) | 38.2<br>(29.2-48.1) | 44.5<br>(37.2-52.1) | 38.9<br>(31.6-46.8) | 51.8<br>(46.3-57.3) | 55.3<br>(48.5-62.0) | 52.1<br>(45.6-58.5) | -                   | <.001 |      |
| Food secure                                        | 40.7<br>(36.7-44.9) | 43.4<br>(40.5-46.3) | 41.9<br>(38.5-45.3) | 47.2<br>(41.9-52.6) | 47.6<br>(42.0-53.2) | 52.2<br>(49.4-55.0) | 52.9<br>(48.5-57.2) | 55.6<br>(50.8-60.2) | -                   | <.001 |      |
| <b>Participation of Federal Nutrition Programs</b> |                     |                     |                     |                     |                     |                     |                     |                     |                     |       |      |
| SNAP                                               |                     |                     |                     |                     |                     |                     |                     |                     |                     |       | .26  |
| Yes                                                | 32.5<br>(26.0-39.7) | 37.1<br>(29.5-45.4) | 41.7<br>(36.1-47.6) | 43.5<br>(35.3-52.1) | 39.1<br>(32.9-45.6) | 47.1<br>(42.9-51.3) | 42.8<br>(37.4-48.4) | 53.6<br>(48.3-58.7) | -                   | <.001 |      |
| No                                                 | 40.3<br>(35.7-45.1) | 42.9<br>(40.0-45.9) | 41.4<br>(37.8-45.1) | 47.2<br>(42.7-51.6) | 47.8<br>(43.0-52.6) | 52.7<br>(49.6-55.9) | 55.4<br>(50.7-60.0) | 52.6<br>(48.5-56.7) | -                   | <.001 |      |
| WIC                                                |                     |                     |                     |                     |                     |                     |                     |                     |                     |       |      |
| Yes                                                | 40.9<br>(30.2-52.5) | 41.6<br>(37.1-46.2) | 46.6<br>(39.0-54.3) | 55.5<br>(49.1-61.6) | 45.5<br>(40.4-50.6) | 54.4<br>(48.5-60.2) | 54.7<br>(47.6-61.6) | 54.3<br>(45.7-62.6) | -                   | .003  | .60  |
| No                                                 | 38.6<br>(34.4-43.0) | 42.1<br>(39.0-45.3) | 40.7<br>(37.2-44.2) | 45.2<br>(40.5-50.0) | 46.0<br>(40.7-51.2) | 50.8<br>(46.5-55.1) | 50.8<br>(46.5-55.1) | 52.6<br>(49.3-55.8) | -                   | <.001 |      |
| NSLP/SBP                                           |                     |                     |                     |                     |                     |                     |                     |                     |                     |       |      |
| Yes                                                | 32.6<br>(27.7-37.8) | 38.8<br>(33.4-44.5) | 40.1<br>(34.5-46.1) | 44.7<br>(38.9-50.6) | 38.3<br>(32.9-44.0) | 46.4<br>(42.8-50.1) | 43.8<br>(39.3-48.3) | 51.8<br>(47.6-56.1) | 43.6<br>(39.6-47.6) | <.001 | .27  |
| No                                                 | 41.8<br>(37.1-46.7) | 43.3<br>(40.3-46.3) | 41.9<br>(38.3-45.7) | 47.2<br>(42.1-52.4) | 48.9<br>(44.2-53.6) | 53.7<br>(50.7-56.7) | 55.5<br>(51.1-59.7) | 53.4<br>(48.7-58.0) | 54.7<br>(49.3-60.0) | <.001 |      |

Abbreviations: GED, general equivalency diploma; NHANES, National Health and Nutrition Examination Survey; SNAP, Supplemental Nutrition Assistance Program; WIC, Special Supplemental Nutrition Program for Women, Infants, and Children; NSLP, National School Lunch Program; SBP, School Breakfast Program; - indicated data not available.

<sup>a</sup> Data were weighted to be nationally representative.

*P* for trend was estimated by treating survey-cycle as a continuous variable in a survey-weighted logistic regression model. *P* for interaction was calculated using the Wald F test for an interaction term between survey-cycle and sociodemographic subgroups.

**eTable 13. Trends in Estimated Mean Consumption of Food Groups and Nutrients of Interest by Age Group among US Children by NHANES Survey Cycles, 1999-2004, 2005-2010 and 2011-2016<sup>a</sup>**

| Foods/nutrients                          | Age 2-5                |                        |                        |             | Age 6-11               |                        |                         |             | Age 12-19              |                         |                         |             | P for interaction |
|------------------------------------------|------------------------|------------------------|------------------------|-------------|------------------------|------------------------|-------------------------|-------------|------------------------|-------------------------|-------------------------|-------------|-------------------|
|                                          | 1999-2004<br>(n=2,284) | 2005-2010<br>(n=2,595) | 2011-2016<br>(n=2,180) | P for trend | 1999-2004<br>(n=2,997) | 2005-2010<br>(n=3,287) | 2011-2016<br>(n= 3,233) | P for trend | 1999-2004<br>(n=6,665) | 2005-2010<br>(n= 4,536) | 2011-2016<br>(n= 3,643) | P for trend |                   |
| Total fruits, servings/d                 | 1.44<br>(1.34-1.53)    | 1.59<br>(1.52-1.66)    | 1.52<br>(1.45-1.59)    | .18         | 0.99<br>(0.91-1.07)    | 1.13<br>(1.07-1.20)    | 1.16<br>(1.07-1.24)     | .004        | 0.89<br>(0.83-0.95)    | 0.89<br>(0.83-0.95)     | 0.87<br>(0.81-0.93)     | .60         | .01               |
| Intact/whole fruit                       | 0.61<br>(0.55-0.67)    | 0.85<br>(0.79-0.91)    | 0.89<br>(0.82-0.95)    | <.001       | 0.50<br>(0.44-0.56)    | 0.71<br>(0.66-0.77)    | 0.77<br>(0.70-0.84)     | <.001       | 0.38<br>(0.35-0.42)    | 0.52<br>(0.47-0.56)     | 0.55<br>(0.51-0.60)     | <.001       | .06               |
| 100% fruit juice                         | 1.12<br>(1.02-1.22)    | 1.03<br>(0.97-1.10)    | 0.90<br>(0.82-0.98)    | .001        | 0.54<br>(0.48-0.59)    | 0.47<br>(0.44-0.51)    | 0.44<br>(0.40-0.48)     | .008        | 0.49<br>(0.45-0.54)    | 0.40<br>(0.36-0.44)     | 0.35<br>(0.31-0.39)     | <.001       | .18               |
| Total vegetables, servings/d             | 0.91<br>(0.87-0.95)    | 0.87<br>(0.83-0.91)    | 0.84<br>(0.79-0.89)    | .02         | 0.99<br>(0.93-1.04)    | 0.93<br>(0.89-0.96)    | 0.94<br>(0.90-0.98)     | .19         | 1.12<br>(1.08-1.17)    | 1.07<br>(1.02-1.12)     | 1.05<br>(1.01-1.09)     | .01         | .76               |
| Dark-green vegetables                    | 0.03<br>(0.03-0.04)    | 0.04<br>(0.03-0.05)    | 0.05<br>(0.04-0.06)    | <.001       | 0.03<br>(0.02-0.04)    | 0.05<br>(0.04-0.06)    | 0.07<br>(0.05-0.08)     | <.001       | 0.04<br>(0.03-0.05)    | 0.05<br>(0.04-0.06)     | 0.06<br>(0.05-0.08)     | .002        | .28               |
| Tomatoes                                 | 0.21<br>(0.20-0.23)    | 0.20<br>(0.18-0.21)    | 0.18<br>(0.17-0.20)    | .007        | 0.26<br>(0.24-0.28)    | 0.21<br>(0.20-0.23)    | 0.22<br>(0.21-0.23)     | .002        | 0.30<br>(0.28-0.33)    | 0.27<br>(0.25-0.28)     | 0.23<br>(0.22-0.24)     | <.001       | .06               |
| Other red/orange vegetables              | 0.05<br>(0.04-0.06)    | 0.05<br>(0.05-0.06)    | 0.07<br>(0.06-0.08)    | .02         | 0.05<br>(0.04-0.07)    | 0.06<br>(0.05-0.07)    | 0.07<br>(0.06-0.08)     | .03         | 0.04<br>(0.04-0.05)    | 0.05<br>(0.04-0.05)     | 0.05<br>(0.04-0.06)     | .15         | .61               |
| White potatoes                           | 0.31<br>(0.28-0.34)    | 0.25<br>(0.23-0.27)    | 0.23<br>(0.21-0.25)    | <.001       | 0.32<br>(0.30-0.35)    | 0.29<br>(0.27-0.31)    | 0.27<br>(0.25-0.29)     | .002        | 0.37<br>(0.34-0.39)    | 0.34<br>(0.31-0.36)     | 0.33<br>(0.31-0.35)     | .02         | .16               |
| Other starchy (e.g., corn)               | 0.08<br>(0.07-0.09)    | 0.07<br>(0.06-0.08)    | 0.07<br>(0.06-0.07)    | .07         | 0.07<br>(0.05-0.08)    | 0.07<br>(0.07-0.08)    | 0.06<br>(0.05-0.07)     | .27         | 0.05<br>(0.04-0.05)    | 0.05<br>(0.04-0.06)     | 0.05<br>(0.04-0.06)     | .46         | .05               |
| Other vegetables                         | 0.19<br>(0.17-0.20)    | 0.20<br>(0.18-0.23)    | 0.19<br>(0.17-0.21)    | .97         | 0.24<br>(0.22-0.27)    | 0.23<br>(0.20-0.25)    | 0.23<br>(0.21-0.25)     | .47         | 0.33<br>(0.31-0.34)    | 0.32<br>(0.29-0.35)     | 0.30<br>(0.28-0.32)     | .03         | .26               |
| Vegetables excluding potatoes/starchy    | 0.48<br>(0.45-0.51)    | 0.49<br>(0.46-0.53)    | 0.49<br>(0.46-0.52)    | .82         | 0.59<br>(0.55-0.63)    | 0.54<br>(0.52-0.57)    | 0.59<br>(0.56-0.62)     | .91         | 0.72<br>(0.68-0.75)    | 0.68<br>(0.64-0.73)     | 0.65<br>(0.61-0.68)     | .003        | .05               |
| Total grains, servings/d                 |                        |                        |                        |             |                        |                        |                         |             |                        |                         |                         |             |                   |
| Whole grains                             | 0.54<br>(0.49-0.59)    | 0.66<br>(0.60-0.71)    | 0.91<br>(0.85-0.97)    | <.001       | 0.54<br>(0.49-0.59)    | 0.61<br>(0.57-0.65)    | 0.94<br>(0.88-0.99)     | <.001       | 0.43<br>(0.40-0.47)    | 0.57<br>(0.51-0.62)     | 0.83<br>(0.77-0.89)     | <.001       | .75               |
| Refined grains                           | 5.95<br>(5.78-6.12)    | 5.56<br>(5.44-5.69)    | 5.69<br>(5.54-5.84)    | .03         | 6.48<br>(6.30-6.66)    | 6.26<br>(6.14-6.39)    | 6.38<br>(6.27-6.49)     | .36         | 6.22<br>(6.12-6.33)    | 6.35<br>(6.23-6.46)     | 6.35<br>(6.24-6.46)     | .09         | .01               |
| Nuts and seeds, servings/d               | 0.33<br>(0.27-0.38)    | 0.37<br>(0.32-0.42)    | 0.41<br>(0.34-0.47)    | .06         | 0.38<br>(0.32-0.45)    | 0.37<br>(0.33-0.42)    | 0.36<br>(0.30-0.43)     | .72         | 0.30<br>(0.26-0.33)    | 0.36<br>(0.30-0.42)     | 0.37<br>(0.33-0.41)     | .008        | .14               |
| Legumes, servings/d                      | 0.06<br>(0.05-0.07)    | 0.06<br>(0.05-0.07)    | 0.06<br>(0.05-0.07)    | .60         | 0.06<br>(0.04-0.07)    | 0.06<br>(0.05-0.07)    | 0.08<br>(0.07-0.09)     | .04         | 0.07<br>(0.06-0.08)    | 0.06<br>(0.05-0.07)     | 0.08<br>(0.06-0.09)     | .23         | .29               |
| Total meat, serving/d                    |                        |                        |                        |             |                        |                        |                         |             |                        |                         |                         |             |                   |
| Processed meat                           | 0.22<br>(0.19-0.25)    | 0.22<br>(0.20-0.24)    | 0.25<br>(0.23-0.26)    | .11         | 0.25<br>(0.23-0.27)    | 0.25<br>(0.24-0.27)    | 0.26<br>(0.24-0.28)     | .56         | 0.25<br>(0.23-0.27)    | 0.26<br>(0.24-0.28)     | 0.27<br>(0.25-0.29)     | .24         | .65               |
| Unprocessed red meat                     | 0.22<br>(0.20-0.24)    | 0.23<br>(0.21-0.24)    | 0.18<br>(0.16-0.20)    | .003        | 0.31<br>(0.29-0.34)    | 0.31<br>(0.28-0.34)    | 0.28<br>(0.26-0.30)     | .05         | 0.44<br>(0.40-0.48)    | 0.40<br>(0.38-0.43)     | 0.40<br>(0.37-0.42)     | .08         | .81               |
| Poultry                                  | 0.24<br>(0.21-0.27)    | 0.30<br>(0.28-0.32)    | 0.31<br>(0.28-0.34)    | .001        | 0.28<br>(0.25-0.31)    | 0.34<br>(0.31-0.36)    | 0.32<br>(0.29-0.34)     | .05         | 0.34<br>(0.31-0.36)    | 0.43<br>(0.40-0.46)     | 0.43<br>(0.39-0.47)     | <.001       | .04               |
| Fish and Shellfish                       | 0.05<br>(0.04-0.07)    | 0.05<br>(0.04-0.06)    | 0.05<br>(0.03-0.07)    | .92         | 0.06<br>(0.05-0.08)    | 0.07<br>(0.05-0.09)    | 0.07<br>(0.05-0.09)     | .47         | 0.07<br>(0.06-0.08)    | 0.07<br>(0.06-0.08)     | 0.08<br>(0.06-0.10)     | .30         | .70               |
| High in omega-3 fatty acids <sup>b</sup> | 0.009<br>(0.005-0.01)  | 0.008<br>(0.005-0.01)  | 0.008<br>(0.005-0.01)  | .88         | 0.01<br>(0.008-0.02)   | 0.01<br>(0.006-0.02)   | 0.01<br>(0.008-0.02)    | .77         | 0.02<br>(0.01-0.02)    | 0.02<br>(0.01-0.02)     | 0.02<br>(0.01-0.02)     | .31         | .56               |
| Low in omega-3 fatty acids <sup>b</sup>  | 0.04<br>(0.03-0.06)    | 0.04<br>(0.03-0.05)    | 0.04<br>(0.02-0.06)    | .93         | 0.05<br>(0.04-0.06)    | 0.06<br>(0.04-0.07)    | 0.06<br>(0.04-0.08)     | .39         | 0.05<br>(0.04-0.06)    | 0.06<br>(0.05-0.06)     | 0.06<br>(0.04-0.08)     | .39         | .72               |

|                                                     |                     |                     |                     |       |                     |                     |                     |       |                     |                     |                     |       |       |
|-----------------------------------------------------|---------------------|---------------------|---------------------|-------|---------------------|---------------------|---------------------|-------|---------------------|---------------------|---------------------|-------|-------|
| Eggs, servings/d                                    | 0.31<br>(0.27-0.34) | 0.38<br>(0.35-0.41) | 0.39<br>(0.35-0.43) | .004  | 0.26<br>(0.22-0.29) | 0.37<br>(0.34-0.40) | 0.36<br>(0.33-0.39) | <.001 | 0.29<br>(0.26-0.31) | 0.35<br>(0.32-0.38) | 0.37<br>(0.34-0.40) | <.001 | .72   |
| Total dairy, servings/d                             | 2.70<br>(2.56-2.84) | 2.85<br>(2.75-2.94) | 2.71<br>(2.61-2.82) | .93   | 2.18<br>(2.07-2.29) | 2.29<br>(2.23-2.36) | 2.31<br>(2.22-2.39) | .06   | 1.83<br>(1.73-1.92) | 1.95<br>(1.88-2.02) | 2.00<br>(1.92-2.09) | .006  | .23   |
| Milk                                                | 1.89<br>(1.78-2.01) | 1.90<br>(1.83-1.96) | 1.66<br>(1.58-1.74) | .001  | 1.53<br>(1.45-1.61) | 1.52<br>(1.47-1.58) | 1.37<br>(1.31-1.43) | .002  | 1.17<br>(1.08-1.27) | 1.14<br>(1.07-1.21) | 1.04<br>(0.98-1.10) | .02   | .57   |
| Cheese                                              | 0.53<br>(0.48-0.58) | 0.61<br>(0.56-0.66) | 0.68<br>(0.63-0.74) | <.001 | 0.58<br>(0.54-0.63) | 0.65<br>(0.62-0.68) | 0.80<br>(0.76-0.83) | <.001 | 0.66<br>(0.62-0.69) | 0.76<br>(0.73-0.80) | 0.88<br>(0.83-0.92) | <.001 | .22   |
| Yogurt                                              | 0.08<br>(0.06-0.09) | 0.08<br>(0.07-0.09) | 0.11<br>(0.09-0.12) | .01   | 0.04<br>(0.02-0.05) | 0.05<br>(0.04-0.06) | 0.07<br>(0.06-0.09) | <.001 | 0.02<br>(0.02-0.03) | 0.03<br>(0.02-0.04) | 0.04<br>(0.03-0.04) | .006  | .006  |
| Sugar-sweetened beverages <sup>c</sup> , servings/d | 1.12<br>(1.02-1.22) | 0.79<br>(0.74-0.83) | 0.60<br>(0.54-0.66) | <.001 | 1.61<br>(1.51-1.71) | 1.20<br>(1.13-1.27) | 1.03<br>(0.97-1.10) | <.001 | 2.50<br>(2.36-2.63) | 2.02<br>(1.90-2.14) | 1.55<br>(1.46-1.64) | <.001 | <.001 |
| Added sugar, g/d                                    | 86.2<br>(82.4-90.1) | 74.8<br>(72.6-77.1) | 68.3<br>(66.2-70.3) | <.001 | 95.7<br>(91.8-99.6) | 83.7<br>(81.6-85.8) | 75.3<br>(73.5-77.0) | <.001 | 105<br>(101-109)    | 89.2<br>(86.3-92.0) | 79.2<br>(76.7-81.8) | <.001 | .03   |
| Macronutrients                                      |                     |                     |                     |       |                     |                     |                     |       |                     |                     |                     |       |       |
| Total fat, %Energy (E)                              | 31.8<br>(31.3-32.3) | 31.9<br>(31.5-32.2) | 32.4<br>(31.9-32.8) | .08   | 32.8<br>(32.4-33.2) | 33.1<br>(32.8-33.4) | 33.4<br>(33.1-33.7) | .02   | 32.3<br>(31.8-32.7) | 33.2<br>(32.8-33.6) | 33.8<br>(33.5-34.2) | <.001 | .03   |
| Saturated fat, %E                                   | 11.8<br>(11.5-12.0) | 11.6<br>(11.4-11.9) | 11.6<br>(11.4-11.8) | .30   | 11.6<br>(11.4-11.8) | 11.7<br>(11.5-11.8) | 11.8<br>(11.6-12.0) | .16   | 11.2<br>(11.0-11.4) | 11.5<br>(11.3-11.6) | 11.5<br>(11.3-11.7) | .009  | .01   |
| Monounsaturated fat, %E                             | 16.7<br>(16.2-17.2) | 16.9<br>(16.4-17.3) | 16.7<br>(16.2-17.2) | .99   | 13.9<br>(13.4-14.4) | 13.7<br>(13.4-13.9) | 13.2<br>(12.9-13.6) | .03   | 13.2<br>(12.8-13.7) | 13.4<br>(12.9-13.8) | 13.6<br>(13.2-14.1) | .22   | .03   |
| Polyunsaturated fat, %E                             | 5.66<br>(5.52-5.81) | 6.06<br>(5.92-6.21) | 6.97<br>(6.85-7.09) | <.001 | 6.28<br>(6.14-6.42) | 6.62<br>(6.50-6.73) | 7.33<br>(7.23-7.44) | <.001 | 6.35<br>(6.22-6.48) | 6.84<br>(6.68-7.0)  | 7.71<br>(7.56-7.86) | <.001 | .05   |
| Seafood omega-3 fat, mg/d                           | 42.1<br>(35.4-48.9) | 44.4<br>(37.9-50.9) | 34.0<br>(26.5-41.6) | .11   | 52.6<br>(44.2-61.1) | 55.0<br>(43.2-66.8) | 44.8<br>(34.0-55.6) | .26   | 62.4<br>(53.2-71.7) | 65.9<br>(53.5-78.3) | 48.4<br>(42.0-54.8) | .01   | .66   |
| Plant omega-3 fat, mg/d                             | 114<br>(111-118)    | 117<br>(114-120)    | 141<br>(138-144)    | <.001 | 117<br>(113-120)    | 119<br>(115-123)    | 142<br>(139-144)    | <.001 | 120<br>(117-123)    | 123<br>(120-126)    | 148<br>(144-152)    | <.001 | .63   |
| Protein, %E                                         | 13.8<br>(13.5-14.0) | 15.0<br>(14.2-14.7) | 14.6<br>(14.3-14.8) | <.001 | 13.6<br>(13.4-13.8) | 14.2<br>(14.1-14.4) | 14.4<br>(14.2-14.6) | <.001 | 13.9<br>(13.7-14.2) | 14.8<br>(14.6-15.0) | 15.3<br>(15.1-15.5) | <.001 | .02   |
| Carbohydrate, %E                                    | 55.8<br>(55.3-56.4) | 55.1<br>(54.6-55.5) | 54.4<br>(53.9-55.0) | .001  | 54.8<br>(53.4-55.3) | 53.8<br>(53.5-54.2) | 53.5<br>(53.1-53.8) | <.001 | 54.3<br>(53.8-54.8) | 52.6<br>(52.1-53.1) | 51.7<br>(51.2-52.2) | <.001 | .01   |
| Other nutrients                                     |                     |                     |                     |       |                     |                     |                     |       |                     |                     |                     |       |       |
| Sodium, mg/d                                        | 3131<br>(3088-3175) | 3140<br>(3087-3193) | 3081<br>(3042-3121) | .09   | 3203<br>(3136-3269) | 3265<br>(3221-3309) | 3232<br>(3192-3272) | .46   | 3157<br>(3114-3201) | 3383<br>(3334-3431) | 3491<br>(3410-3572) | <.001 | <.001 |
| Cholesterol, mg/d                                   | 234<br>(224-243)    | 244<br>(235-253)    | 245<br>(235-255)    | .11   | 216<br>(209-224)    | 230<br>(223-238)    | 232<br>(224-239)    | .004  | 224<br>(218-230)    | 235<br>(228-243)    | 251<br>(243-259)    | <.001 | .11   |
| Fiber, g/d                                          | 12.8<br>(12.4-13.1) | 14.5<br>(14.1-14.9) | 15.7<br>(15.4-16.1) | <.001 | 12.7<br>(12.4-13.0) | 14.1<br>(13.8-14.4) | 15.7<br>(15.3-16.0) | <.001 | 12.0<br>(11.7-12.3) | 13.2<br>(13.0-13.5) | 14.8<br>(14.6-15.1) | <.001 | .85   |
| Potassium, mg/d                                     | 2497<br>(2446-2548) | 2552<br>(2518-2586) | 2511<br>(2470-2552) | .68   | 2226<br>(2171-2281) | 2277<br>(2245-2309) | 2314<br>(2280-2349) | .008  | 2169<br>(2125-2212) | 2189<br>(2151-2226) | 2266<br>(2232-2300) | <.001 | .07   |
| Calcium, mg/d                                       | 1094<br>(1051-1136) | 1207<br>(1179-1235) | 1199<br>(1171-1227) | <.001 | 960<br>(929-991)    | 1059<br>(1037-1081) | 1107<br>(1082-1133) | <.001 | 862<br>(835-889)    | 981<br>(958-1004)   | 1023<br>(995-1052)  | <.001 | .15   |

Abbreviation: NHANES, National Health and Nutrition Examination Survey.

<sup>a</sup> Data were weighted to be nationally representative. All analyses (except for macronutrients) were energy-adjusted to 2000 kcal/d using the residual method. Macronutrients were reported as % of total energy.

<sup>b</sup> Cooked fish and shellfish containing 500 mg or more of omega-3 fatty acids (EPA and DHA) per 3 ounces were included in the high omega-3 fatty acids category.

<sup>c</sup> Serving of sugar-sweetened beverage defined as 8 fl oz or 237 grams. Sugar-sweetened beverages include soft drinks, fruit drinks, sports drinks, presweetened teas and energy drinks with more than 50 kcal per 8 fl oz.

*P* for trend was estimated by treating survey-cycle as a continuous variable in a survey-weighted linear regression model. *P* for interaction was calculated using the Wald F test for an interaction term between survey-cycle and the categorical variable (age groups).

**eTable 14. Trends in Estimated Mean Consumption of Food Groups and Nutrients of Interest by Sex Among US Children by NHANES Survey Cycles, 1999-2004, 2005-2010 and 2011-2016<sup>a</sup>**

| Foods/nutrients                                     | Female              |                      |                     | P for trend | Male                 |                     |                     | P for trend | P for interaction |
|-----------------------------------------------------|---------------------|----------------------|---------------------|-------------|----------------------|---------------------|---------------------|-------------|-------------------|
|                                                     | 1999-2004 (n=5,974) | 2005-2010 (n=5,111)  | 2011-2016 (n=4,487) |             | 1999-2004 (n=5,972)  | 2005-2010 (n=5,307) | 2011-2016 (n=4,569) |             |                   |
| Total fruits, servings/d                            | 1.15<br>(0.99-1.11) | 1.10<br>(1.04-1.17)  | 1.07<br>(1.02-1.12) | .64         | 1.03<br>(0.96-1.10)  | 1.14<br>(1.07-1.20) | 1.14<br>(1.06-1.21) | .05         | .14               |
| Intact/whole fruit                                  | 0.48<br>(0.44-0.53) | 0.64<br>(0.59-0.69)  | 0.69<br>(0.63-0.74) | <.001       | 0.46<br>(0.43-0.49)  | 0.67<br>(0.62-0.72) | 0.71<br>(0.65-0.76) | <.001       | .20               |
| 100% fruit juice                                    | 0.70<br>(0.65-0.74) | 0.61<br>(0.57-0.64)  | 0.50<br>(0.46-0.55) | <.001       | 0.59<br>(0.53-0.64)  | 0.52<br>(0.48-0.57) | 0.49<br>(0.44-0.54) | .007        | .02               |
| Total vegetables, servings/d                        | 1.1<br>(1.0-1.1)    | 1.0<br>(0.99-1.1)    | 1.0<br>(0.97-1.0)   | .07         | 1.0<br>(0.97-1.0)    | 0.94<br>(0.91-0.97) | 0.93<br>(0.90-0.96) | .003        | .48               |
| Dark-green vegetables                               | 0.04<br>(0.03-0.05) | 0.05<br>(0.04-0.06)  | 0.07<br>(0.05-0.08) | .001        | 0.03<br>(0.03-0.04)  | 0.04<br>(0.04-0.05) | 0.06<br>(0.05-0.07) | <.001       | .96               |
| Tomatoes                                            | 0.26<br>(0.24-0.27) | 0.23<br>(0.22-0.25)  | 0.21<br>(0.20-0.22) | <.001       | 0.28<br>(0.27-0.30)  | 0.23<br>(0.22-0.24) | 0.22<br>(0.21-0.24) | <.001       | .30               |
| Other red/orange vegetables                         | 0.05<br>(0.04-0.06) | 0.05<br>(0.04-0.05)  | 0.06<br>(0.05-0.07) | .03         | 0.05<br>(0.04-0.06)  | 0.06<br>(0.05-0.06) | 0.06<br>(0.05-0.07) | .03         | .88               |
| White potatoes                                      | 0.34<br>(0.31-0.36) | 0.30<br>(0.28-0.33)  | 0.29<br>(0.27-0.31) | .002        | 0.34<br>(0.32-0.37)  | 0.30<br>(0.28-0.32) | 0.29<br>(0.27-0.31) | <.001       | .61               |
| Other starchy (e.g., corn)                          | 0.07<br>(0.06-0.07) | 0.07<br>(0.06-0.07)  | 0.06<br>(0.06-0.07) | .56         | 0.06<br>(0.05-0.07)  | 0.06<br>(0.05-0.07) | 0.05<br>(0.04-0.06) | .32         | .76               |
| Other vegetables                                    | 0.28<br>(0.27-0.30) | 0.27<br>(0.25-0.30)  | 0.27<br>(0.25-0.28) | .17         | 0.25<br>(0.23-0.28)  | 0.25<br>(0.23-0.27) | 0.24<br>(0.22-0.25) | .20         | .98               |
| Vegetables excluding potatoes/starchy               | 0.63<br>(0.61-0.65) | 0.61<br>(0.58-0.64)  | 0.61<br>(0.58-0.63) | .18         | 0.62<br>(0.58-0.65)  | 0.58<br>(0.56-0.61) | 0.58<br>(0.56-0.60) | .08         | .66               |
| Total grains, servings/d                            |                     |                      |                     |             |                      |                     |                     |             |                   |
| Whole grains                                        | 0.47<br>(0.44-0.50) | 0.56<br>(0.52-0.60)  | 0.84<br>(0.79-0.89) | <.001       | 0.51<br>(0.47-0.56)  | 0.64<br>(0.59-0.68) | 0.92<br>(0.87-0.97) | <.001       | .34               |
| Refined grains                                      | 6.31<br>(6.15-6.47) | 6.20<br>(6.09-6.32)  | 6.24<br>(6.14-6.34) | .49         | 6.2<br>(6.1-6.3)     | 6.1<br>(6.0-6.2)    | 6.2<br>(6.1-6.3)    | .94         | .54               |
| Nuts and seeds, servings/d                          | 0.34<br>(0.30-0.38) | 0.35<br>(0.30-0.39)  | 0.38<br>(0.33-0.43) | .19         | 0.32<br>(0.27-0.37)  | 0.38<br>(0.34-0.42) | 0.37<br>(0.33-0.41) | .15         | .92               |
| Legumes, servings/d                                 | 0.06<br>(0.05-0.07) | 0.06<br>(0.05-0.07)  | 0.07<br>(0.07-0.08) | .01         | 0.06<br>(0.05-0.08)  | 0.06<br>(0.05-0.07) | 0.07<br>(0.06-0.08) | .34         | .41               |
| Total meat, serving/d                               |                     |                      |                     |             |                      |                     |                     |             |                   |
| Processed meat                                      | 0.22<br>(0.21-0.24) | 0.22<br>(0.21-0.23)  | 0.23<br>(0.21-0.24) | .61         | 0.27<br>(0.25-0.29)  | 0.28<br>(0.26-0.30) | 0.29<br>(0.27-0.32) | .09         | .21               |
| Unprocessed red meat                                | 0.31<br>(0.29-0.34) | 0.30<br>(0.28-0.32)  | 0.28<br>(0.26-0.30) | .02         | 0.39<br>(0.35-0.42)  | 0.37<br>(0.34-0.39) | 0.34<br>(0.32-0.37) | .04         | .79               |
| Poultry                                             | 0.29<br>(0.27-0.32) | 0.36<br>(0.34-0.39)  | 0.36<br>(0.33-0.38) | <.001       | 0.30<br>(0.27-0.32)  | 0.38<br>(0.36-0.40) | 0.38<br>(0.35-0.41) | <.001       | .35               |
| Fish and Shellfish                                  | 0.06<br>(0.05-0.07) | 0.06<br>(0.05-0.08)  | 0.07<br>(0.06-0.08) | .39         | 0.06<br>(0.05-0.08)  | 0.07<br>(0.05-0.08) | 0.07<br>(0.06-0.09) | .40         | .82               |
| High in omega-3 fatty acids <sup>b</sup>            | 0.01<br>(0.01-0.02) | 0.01<br>(0.009-0.02) | 0.01<br>(0.01-0.02) | .82         | 0.01<br>(0.009-0.02) | 0.01<br>(0.01-0.02) | 0.01<br>(0.01-0.02) | .56         | .75               |
| Low in omega-3 fatty acids <sup>b</sup>             | 0.05<br>(0.04-0.06) | 0.05<br>(0.04-0.06)  | 0.05<br>(0.04-0.07) | .35         | 0.05<br>(0.04-0.06)  | 0.05<br>(0.04-0.06) | 0.06<br>(0.04-0.08) | .44         | .91               |
| Eggs, servings/d                                    | 0.26<br>(0.24-0.29) | 0.35<br>(0.32-0.37)  | 0.35<br>(0.33-0.38) | <.001       | 0.30<br>(0.28-0.32)  | 0.38<br>(0.35-0.41) | 0.39<br>(0.36-0.41) | <.001       | .92               |
| Total dairy, servings/d                             | 2.08<br>(2.01-2.16) | 2.20<br>(2.14-2.27)  | 2.21<br>(2.12-2.30) | .03         | 2.18<br>(2.10-2.26)  | 2.31<br>(2.25-2.37) | 2.30<br>(2.23-2.37) | .04         | .86               |
| Milk                                                | 1.35<br>(1.29-1.41) | 1.34<br>(1.29-1.40)  | 1.20<br>(1.13-1.26) | <.001       | 1.54<br>(1.47-1.62)  | 1.52<br>(1.46-1.57) | 1.36<br>(1.30-1.42) | <.001       | .60               |
| Cheese                                              | 0.60<br>(0.57-0.64) | 0.68<br>(0.65-0.72)  | 0.80<br>(0.76-0.84) | <.001       | 0.61<br>(0.58-0.64)  | 0.70<br>(0.67-0.73) | 0.81<br>(0.78-0.84) | <.001       | .92               |
| Yogurt                                              | 0.04<br>(0.03-0.05) | 0.05<br>(0.04-0.05)  | 0.07<br>(0.06-0.08) | <.001       | 0.04<br>(0.03-0.05)  | 0.05<br>(0.04-0.06) | 0.06<br>(0.05-0.07) | <.001       | .36               |
| Sugar-sweetened beverages <sup>c</sup> , servings/d | 1.75<br>(1.66-1.85) | 1.34<br>(1.27-1.40)  | 1.10<br>(1.02-1.17) | <.001       | 2.05<br>(1.93-2.17)  | 1.62<br>(1.51-1.72) | 1.25<br>(1.17-1.32) | <.001       | .04               |
| Added sugar, g/d                                    | 99.4<br>(96.2-103)  | 85.0<br>(83.0-87.1)  | 76.8<br>(74.9-78.7) | <.001       | 96.6<br>(93.3-100)   | 83.5<br>(81.1-85.8) | 74.3<br>(72.5-76.2) | <.001       | .91               |
| Macronutrients                                      |                     |                      |                     |             |                      |                     |                     |             |                   |
| Total fat, %Energy (E)                              | 32.5<br>(32.0-32.9) | 32.9<br>(32.6-33.2)  | 33.5<br>(33.2-33.8) | <.001       | 32.2<br>(31.9-32.5)  | 32.8<br>(32.5-33.0) | 33.3<br>(32.9-33.6) | <.001       | .87               |
| Saturated fat, %E                                   | 11.4<br>(11.2-11.6) | 11.6<br>(11.4-11.7)  | 11.6<br>(11.5-11.8) | .13         | 11.5<br>(11.3-11.6)  | 11.6<br>(11.5-11.7) | 11.7<br>(11.5-11.8) | .12         | .98               |
| Monounsaturated fat, %E                             | 15.8<br>(15.3-16.3) | 15.6<br>(15.3-16.0)  | 15.5<br>(15.1-15.9) | .42         | 12.7<br>(12.3-13.0)  | 12.8<br>(12.6-13.1) | 12.8<br>(12.5-13.1) | .54         | .24               |

|                           |                     |                     |                     |       |                     |                     |                     |       |     |
|---------------------------|---------------------|---------------------|---------------------|-------|---------------------|---------------------|---------------------|-------|-----|
| Polyunsaturated fat, %E   | 6.31<br>(6.21-6.42) | 6.78<br>(6.68-6.87) | 7.60<br>(7.49-7.72) | <.001 | 6.05<br>(5.96-6.15) | 6.42<br>(6.30-6.54) | 7.26<br>(7.13-7.38) | <.001 | .43 |
| Seafood omega-3 fat, mg/d | 55.4<br>(49.6-61.1) | 53.5<br>(46.0-61.0) | 41.4<br>(36.6-46.1) | <.001 | 54.3<br>(47.2-61.3) | 61.7<br>(49.7-73.7) | 46.8<br>(38.6-55.0) | .17   | .27 |
| Plant omega-3 fat, mg/d   | 122<br>(119-124)    | 126<br>(124-129)    | 149<br>(146-153)    | <.001 | 114<br>(111-117)    | 115<br>(112-118)    | 140<br>(137-142)    | <.001 | .43 |
| Protein, %E               | 13.7<br>(13.5-13.8) | 14.4<br>(14.2-14.5) | 14.6<br>(14.4-14.8) | <.001 | 13.9<br>(13.7-14.1) | 14.7<br>(14.6-14.9) | 15.1<br>(14.9-15.2) | <.001 | .23 |
| Carbohydrate, %E          | 55.0<br>(54.5-55.5) | 53.8<br>(53.4-54.1) | 53.1<br>(52.8-53.4) | <.001 | 54.6<br>(47.2-55.0) | 53.3<br>(53.0-53.6) | 52.9<br>(52.2-53.1) | <.001 | .94 |
| Other nutrients           |                     |                     |                     | <.001 |                     |                     |                     |       |     |
| Sodium, mg/d              | 3179<br>(3142-3215) | 3316<br>(3270-3362) | 3337<br>(3265-3408) | <.001 | 3156<br>(3118-3194) | 3266<br>(3235-3297) | 3299<br>(3253-3345) | <.001 | .76 |
| Cholesterol, mg/d         | 222<br>(216-227)    | 234<br>(228-240)    | 240<br>(233-247)    | <.001 | 225<br>(220-231)    | 237<br>(230-244)    | 246<br>(240-252)    | <.001 | .63 |
| Fiber, g/d                | 12.5<br>(12.3-12.8) | 14.0<br>(13.7-14.3) | 15.5<br>(15.2-15.7) | <.001 | 12.3<br>(11.9-12.6) | 13.6<br>(13.3-13.8) | 15.1<br>(14.8-15.4) | <.001 | .72 |
| Potassium, mg/d           | 2243<br>(2202-2283) | 2280<br>(2248-2311) | 2310<br>(2279-2340) | .01   | 2273<br>(2226-2320) | 2315<br>(2280-2349) | 2358<br>(2328-2389) | .003  | .54 |
| Calcium, mg/d             | 918<br>(896-941)    | 1034<br>(1014-1054) | 1064<br>(1039-1089) | <.001 | 970<br>(943-996)    | 1078<br>(1059-1097) | 1113<br>(1090-1136) | <.001 | .86 |

Abbreviation: NHANES, National Health and Nutrition Examination Survey.

<sup>a</sup> Data were weighted to be nationally representative. All analyses (except for macronutrients) were energy-adjusted to 2000 kcal/d using the residual method. Macronutrients were reported as % of total energy.

<sup>b</sup> Cooked fish and shellfish containing 500 mg or more of omega-3 fatty acids (EPA and DHA) per 3 ounces were included in the high omega-3 fatty acids category.

<sup>c</sup> Serving of sugar-sweetened beverage defined as 8 fl oz or 237 grams. Sugar-sweetened beverages include soft drinks, fruit drinks, sports drinks, presweetened teas and energy drinks with more than 50 kcal per 8 fl oz.

*P* for trend was estimated by treating survey-cycle as a continuous variable in a survey-weighted linear regression model. *P* for interaction was calculated using the Wald F test for an interaction term between survey-cycle and the dichotomous variable (sex).

**eTable 15. Trends in Estimated Mean Consumption of Food Groups and Nutrients of Interest by Race/Ethnicity Among US Children by NHANES Survey Cycles, 1999-2004, 2010 and 2011-2016<sup>a</sup>**

| Foods/nutrients                          | Non-Hispanic White     |                        |                        | P for trend | Non-Hispanic Black     |                        |                        | P for trend | Mexican American       |                        |                        | P for trend | P for interaction |
|------------------------------------------|------------------------|------------------------|------------------------|-------------|------------------------|------------------------|------------------------|-------------|------------------------|------------------------|------------------------|-------------|-------------------|
|                                          | 1999-2004<br>(n=3,231) | 2005-2010<br>(n=3,167) | 2011-2016<br>(n=2,333) |             | 1999-2004<br>(n=3,686) | 2005-2010<br>(n=2,693) | 2011-2016<br>(n=2,344) |             | 1999-2004<br>(n=3,990) | 2005-2010<br>(n=3,030) | 2011-2016<br>(n=1,923) |             |                   |
| Total fruits, servings/d                 | 1.01<br>(0.94-1.07)    | 1.06<br>(0.98-1.14)    | 1.07<br>(1.0-1.15)     | .17         | 1.05<br>(0.98-1.12)    | 1.09<br>(1.03-1.15)    | 1.01<br>(0.94-1.08)    | .42         | 1.25<br>(1.16-1.34)    | 1.29<br>(1.22-1.36)    | 1.22<br>(1.16-1.29)    | .59         | .39               |
| Intact/whole fruit                       | 0.48<br>(0.44-0.53)    | 0.67<br>(0.60-0.74)    | 0.72<br>(0.66-0.78)    | <.001       | 0.35<br>(0.32-0.39)    | 0.48<br>(0.45-0.52)    | 0.50<br>(0.45-0.55)    | <.001       | 0.60<br>(0.54-0.65)    | 0.73<br>(0.69-0.77)    | 0.76<br>(0.70-0.82)    | <.001       | .13               |
| 100% fruit juice                         | 0.59<br>(0.54-0.64)    | 0.47<br>(0.43-0.51)    | 0.41<br>(0.37-0.46)    | <.001       | 0.78<br>(0.72-0.84)    | 0.75<br>(0.69-0.82)    | 0.65<br>(0.59-0.71)    | .005        | 0.75<br>(0.70-0.80)    | 0.69<br>(0.64-0.74)    | 0.59<br>(0.55-0.64)    | <.001       | .39               |
| Total vegetables, servings/d             | 1.0<br>(0.98-1.1)      | 0.98<br>(0.94-1.0)     | 0.94<br>(0.89-0.98)    | .007        | 1.03<br>(0.99-1.07)    | 0.98<br>(0.94-1.02)    | 0.97<br>(0.92-1.03)    | .08         | 1.08<br>(1.03-1.13)    | 0.93<br>(0.89-0.97)    | 1.02<br>(0.98-1.06)    | .13         | .88               |
| Dark-green vegetables                    | 0.03<br>(0.03-0.04)    | 0.05<br>(0.04-0.06)    | 0.06<br>(0.05-0.08)    | <.001       | 0.05<br>(0.04-0.06)    | 0.06<br>(0.05-0.08)    | 0.07<br>(0.05-0.09)    | .13         | 0.03<br>(0.02-0.03)    | 0.03<br>(0.02-0.03)    | 0.04<br>(0.03-0.05)    | .03         | .27               |
| Tomatoes                                 | 0.27<br>(0.25-0.28)    | 0.24<br>(0.22-0.25)    | 0.21<br>(0.20-0.22)    | <.001       | 0.26<br>(0.24-0.28)    | 0.20<br>(0.19-0.22)    | 0.22<br>(0.20-0.23)    | .001        | 0.31<br>(0.29-0.34)    | 0.24<br>(0.23-0.26)    | 0.25<br>(0.24-0.26)    | <.001       | .69               |
| Other red/orange vegetables              | 0.05<br>(0.04-0.06)    | 0.06<br>(0.05-0.06)    | 0.07<br>(0.06-0.08)    | .03         | 0.03<br>(0.03-0.03)    | 0.03<br>(0.03-0.04)    | 0.04<br>(0.03-0.05)    | .004        | 0.05<br>(0.04-0.06)    | 0.05<br>(0.05-0.06)    | 0.06<br>(0.05-0.07)    | .27         | .83               |
| White potatoes                           | 0.33<br>(0.31-0.36)    | 0.30<br>(0.28-0.33)    | 0.29<br>(0.26-0.31)    | .004        | 0.37<br>(0.34-0.39)    | 0.36<br>(0.34-0.38)    | 0.34<br>(0.32-0.37)    | .14         | 0.32<br>(0.30-0.35)    | 0.26<br>(0.24-0.28)    | 0.27<br>(0.25-0.30)    | .01         | .23               |
| Other starchy (e.g., corn)               | 0.06<br>(0.05-0.07)    | 0.06<br>(0.05-0.07)    | 0.05<br>(0.05-0.06)    | .49         | 0.07<br>(0.06-0.08)    | 0.07<br>(0.06-0.08)    | 0.07<br>(0.06-0.08)    | .88         | 0.06<br>(0.05-0.07)    | 0.05<br>(0.04-0.06)    | 0.05<br>(0.04-0.06)    | .15         | .88               |
| Other vegetables                         | 0.27<br>(0.25-0.29)    | 0.26<br>(0.24-0.29)    | 0.23<br>(0.21-0.25)    | .008        | 0.24<br>(0.23-0.25)    | 0.23<br>(0.21-0.25)    | 0.21<br>(0.19-0.22)    | .002        | 0.30<br>(0.28-0.31)    | 0.27<br>(0.25-0.29)    | 0.31<br>(0.29-0.34)    | .20         | .04               |
| Vegetables excluding potatoes/starchy    | 0.62<br>(0.59-0.64)    | 0.60<br>(0.56-0.64)    | 0.57<br>(0.54-0.60)    | .01         | 0.58<br>(0.55-0.61)    | 0.53<br>(0.50-0.56)    | 0.53<br>(0.49-0.57)    | .05         | 0.68<br>(0.65-0.72)    | 0.60<br>(0.57-0.63)    | 0.66<br>(0.62-0.70)    | .53         | .77               |
| Total grains, servings/d                 |                        |                        |                        |             |                        |                        |                        |             |                        |                        |                        |             |                   |
| Whole grains                             | 0.55<br>(0.50-0.60)    | 0.65<br>(0.59-0.71)    | 0.94<br>(0.89-1.0)     | <.001       | 0.38<br>(0.35-0.40)    | 0.50<br>(0.46-0.54)    | 0.77<br>(0.71-0.84)    | <.001       | 0.41<br>(0.37-0.44)    | 0.51<br>(0.48-0.54)    | 0.77<br>(0.70-0.83)    | <.001       | .60               |
| Refined grains                           | 6.2<br>(6.1-6.3)       | 6.1<br>(5.9-6.2)       | 6.1<br>(6.0-6.2)       | .18         | 6.20<br>(6.06-6.33)    | 5.98<br>(5.88-6.08)    | 6.19<br>(6.08-6.30)    | .94         | 6.22<br>(6.10-6.34)    | 6.62<br>(6.46-6.78)    | 6.60<br>(6.45-6.75)    | <.001       | <.001             |
| Nuts and seeds, servings/d               | 0.39<br>(0.34-0.44)    | 0.45<br>(0.40-0.50)    | 0.47<br>(0.42-0.53)    | .03         | 0.24<br>(0.20-0.28)    | 0.22<br>(0.19-0.26)    | 0.24<br>(0.21-0.27)    | .95         | 0.22<br>(0.19-0.26)    | 0.22<br>(0.19-0.26)    | 0.25<br>(0.20-0.29)    | .38         | .51               |
| Legumes, servings/d                      | 0.04<br>(0.03-0.05)    | 0.04<br>(0.03-0.05)    | 0.05<br>(0.04-0.05)    | .32         | 0.05<br>(0.04-0.07)    | 0.05<br>(0.04-0.06)    | 0.06<br>(0.04-0.07)    | .62         | 0.16<br>(0.14-0.18)    | 0.14<br>(0.13-0.16)    | 0.15<br>(0.13-0.17)    | .56         | .61               |
| Total meat, serving/d                    |                        |                        |                        |             |                        |                        |                        |             |                        |                        |                        |             |                   |
| Processed meat                           | 0.25<br>(0.23-0.27)    | 0.26<br>(0.25-0.28)    | 0.29<br>(0.26-0.31)    | .02         | 0.29<br>(0.27-0.32)    | 0.27<br>(0.25-0.30)    | 0.26<br>(0.24-0.28)    | .02         | 0.19<br>(0.18-0.21)    | 0.19<br>(0.17-0.20)    | 0.21<br>(0.19-0.23)    | .12         | <.001             |
| Unprocessed red meat                     | 0.33<br>(0.29-0.36)    | 0.33<br>(0.30-0.35)    | 0.30<br>(0.27-0.33)    | .27         | 0.36<br>(0.33-0.39)    | 0.31<br>(0.29-0.34)    | 0.32<br>(0.29-0.34)    | .04         | 0.41<br>(0.38-0.45)    | 0.36<br>(0.35-0.38)    | 0.33<br>(0.31-0.36)    | <.001       | .10               |
| Poultry                                  | 0.27<br>(0.25-0.29)    | 0.34<br>(0.31-0.36)    | 0.32<br>(0.29-0.35)    | .009        | 0.39<br>(0.36-0.41)    | 0.48<br>(0.45-0.51)    | 0.49<br>(0.45-0.52)    | <.001       | 0.28<br>(0.26-0.30)    | 0.39<br>(0.37-0.42)    | 0.39<br>(0.35-0.43)    | <.001       | .16               |
| Fish and Shellfish                       | 0.05<br>(0.04-0.07)    | 0.06<br>(0.04-0.07)    | 0.05<br>(0.04-0.07)    | .90         | 0.09<br>(0.07-0.10)    | 0.09<br>(0.07-0.10)    | 0.09<br>(0.06-0.12)    | .92         | 0.07<br>(0.05-0.08)    | 0.06<br>(0.05-0.07)    | 0.07<br>(0.06-0.08)    | .91         | .94               |
| High in omega-3 fatty acids <sup>b</sup> | 0.01<br>(0.008-0.02)   | 0.01<br>(0.009-0.02)   | 0.01<br>(0.008-0.01)   | .81         | 0.01<br>(0.008-0.02)   | 0.01<br>(0.007-0.02)   | 0.009<br>(0.006-0.01)  | .22         | 0.01<br>(0.008-0.01)   | 0.01<br>(0.007-0.02)   | 0.01<br>(0.009-0.02)   | .54         | .31               |
| Low in omega-3 fatty acids <sup>b</sup>  | 0.04<br>(0.03-0.05)    | 0.04<br>(0.03-0.05)    | 0.04<br>(0.03-0.06)    | .82         | 0.08<br>(0.06-0.09)    | 0.08<br>(0.06-0.09)    | 0.08<br>(0.06-0.11)    | .73         | 0.06<br>(0.04-0.07)    | 0.05<br>(0.04-0.06)    | 0.06<br>(0.05-0.07)    | .92         | .96               |

|                                                     |                     |                     |                     |       |                     |                     |                     |       |                     |                     |                     |       |      |
|-----------------------------------------------------|---------------------|---------------------|---------------------|-------|---------------------|---------------------|---------------------|-------|---------------------|---------------------|---------------------|-------|------|
| Eggs, servings/d                                    | 0.24<br>(0.22-0.27) | 0.33<br>(0.31-0.36) | 0.32<br>(0.30-0.35) | <.001 | 0.30<br>(0.27-0.32) | 0.35<br>(0.31-0.39) | 0.33<br>(0.30-0.37) | .08   | 0.43<br>(0.38-0.47) | 0.46<br>(0.41-0.51) | 0.49<br>(0.45-0.54) | .03   | .26  |
| Total dairy, servings/d                             | 2.28<br>(2.19-2.37) | 2.39<br>(2.32-2.45) | 2.41<br>(2.33-2.50) | .03   | 1.58<br>(1.52-1.64) | 1.77<br>(1.70-1.83) | 1.72<br>(1.63-1.80) | .02   | 2.16<br>(2.07-2.25) | 2.28<br>(2.18-2.37) | 2.27<br>(2.19-2.35) | .10   | .24  |
| Milk                                                | 1.56<br>(1.48-1.64) | 1.53<br>(1.47-1.59) | 1.38<br>(1.31-1.45) | .001  | 0.98<br>(0.93-1.04) | 1.03<br>(0.98-1.08) | 0.90<br>(0.83-0.98) | .09   | 1.50<br>(1.43-1.57) | 1.46<br>(1.38-1.53) | 1.28<br>(1.21-1.35) | <.001 | .04  |
| Cheese                                              | 0.63<br>(0.60-0.67) | 0.73<br>(0.70-0.76) | 0.86<br>(0.82-0.91) | <.001 | 0.55<br>(0.52-0.58) | 0.65<br>(0.61-0.69) | 0.71<br>(0.65-0.76) | <.001 | 0.56<br>(0.52-0.60) | 0.64<br>(0.61-0.68) | 0.82<br>(0.78-0.87) | <.001 | .05  |
| Yogurt                                              | 0.05<br>(0.04-0.06) | 0.05<br>(0.05-0.06) | 0.07<br>(0.06-0.09) | .002  | 0.02<br>(0.01-0.02) | 0.02<br>(0.01-0.02) | 0.03<br>(0.02-0.04) | .005  | 0.03<br>(0.02-0.04) | 0.05<br>(0.04-0.06) | 0.06<br>(0.05-0.07) | <.001 | .22  |
| Sugar-sweetened beverages <sup>c</sup> , servings/d | 1.93<br>(1.81-2.04) | 1.52<br>(1.40-1.64) | 1.21<br>(1.09-1.32) | <.001 | 1.93<br>(1.83-2.03) | 1.58<br>(1.48-1.68) | 1.37<br>(1.26-1.47) | <.001 | 1.83<br>(1.72-1.94) | 1.43<br>(1.33-1.54) | 1.16<br>(1.05-1.28) | <.001 | .24  |
| Added sugar, g/d                                    | 100<br>(96.6-104)   | 86.5<br>(84.0-89.0) | 79.0<br>(76.4-81.9) | <.001 | 100<br>(95.8-106)   | 86.9<br>(84.0-89.9) | 79.4<br>(76.9-82.3) | <.001 | 90.3<br>(87.4-93.2) | 78.1<br>(75.2-80.6) | 67.6<br>(65.1-70.6) | <.001 | .94  |
| Macronutrients                                      |                     |                     |                     |       |                     |                     |                     |       |                     |                     |                     |       |      |
| Total fat, %Energy (E)                              | 32.2<br>(31.8-32.7) | 32.9<br>(32.6-33.2) | 33.4<br>(32.9-33.8) | <.001 | 33.3<br>(32.9-33.7) | 34.0<br>(33.7-34.4) | 33.9<br>(33.4-34.4) | .09   | 32.5<br>(32.1-32.8) | 32.1<br>(31.8-32.5) | 33.5<br>(33.2-33.9) | <.001 | .38  |
| Saturated fat, %E                                   | 11.5<br>(11.3-11.7) | 11.7<br>(11.6-11.9) | 11.9<br>(11.6-12.1) | .02   | 11.4<br>(11.2-11.5) | 11.4<br>(11.3-11.6) | 11.1<br>(10.9-11.4) | .16   | 11.6<br>(11.4-11.8) | 11.3<br>(11.1-11.4) | 11.6<br>(11.4-11.8) | .50   | .05  |
| Monounsaturated fat, %E                             | 14.0<br>(13.5-14.4) | 13.8<br>(13.4-14.2) | 13.7<br>(13.3-14.1) | .38   | 15.6<br>(14.8-16.3) | 15.5<br>(14.9-16.2) | 15.1<br>(14.5-15.8) | .36   | 14.5<br>(14.0-15.1) | 14.4<br>(14.1-14.7) | 14.5<br>(13.9-15.1) | .89   | .75  |
| Polyunsaturated fat, %E                             | 6.12<br>(6.0-6.24)  | 6.49<br>(6.36-6.62) | 7.29<br>(7.16-7.42) | <.001 | 6.48<br>(6.35-6.61) | 7.20<br>(7.05-7.34) | 7.98<br>(7.85-8.11) | <.001 | 6.14<br>(6.05-6.23) | 6.50<br>(6.38-6.61) | 7.51<br>(7.38-7.63) | <.001 | .008 |
| Seafood omega-3 fat, mg/d                           | 47.1<br>(39.4-54.8) | 50.1<br>(39.4-60.7) | 36.4<br>(29.5-43.2) | .05   | 76.4<br>(67.2-85.7) | 79.9<br>(66.3-93.5) | 44.0<br>(35.7-52.2) | <.001 | 56.6<br>(49.3-64.0) | 58.5<br>(48.7-68.3) | 46.8<br>(39.8-53.8) | .04   | .006 |
| Plant omega-3 fat, mg/d                             | 116<br>(113-119)    | 118<br>(115-121)    | 141<br>(138-145)    | <.001 | 119<br>(116-122)    | 125<br>(122-128)    | 149<br>(146-152)    | <.001 | 122<br>(119-124)    | 118<br>(115-121)    | 148<br>(145-150)    | <.001 | .31  |
| Protein, %E                                         | 13.6<br>(13.4-13.9) | 14.5<br>(14.3-14.7) | 14.7<br>(14.5-14.9) | <.001 | 13.6<br>(13.4-13.8) | 14.1<br>(13.9-14.3) | 14.3<br>(14.1-14.5) | <.001 | 14.3<br>(14.1-14.5) | 15.0<br>(14.8-15.3) | 15.4<br>(15.2-15.5) | <.001 | .03  |
| Carbohydrate, %E                                    | 55.1<br>(54.6-55.7) | 53.6<br>(53.2-54.0) | 53.1<br>(52.5-53.6) | <.001 | 54.0<br>(53.5-54.4) | 52.7<br>(52.2-53.2) | 52.8<br>(52.3-53.3) | .001  | 54.3<br>(54.0-54.7) | 53.8<br>(53.3-54.3) | 52.2<br>(51.8-52.6) | <.001 | .04  |
| Other nutrients                                     |                     |                     |                     |       |                     |                     |                     |       |                     |                     |                     |       |      |
| Sodium, mg/d                                        | 3133<br>(3093-3173) | 3288<br>(3244-3332) | 3299<br>(3226-3371) | <.001 | 3281<br>(3229-3333) | 3309<br>(3260-3358) | 3331<br>(3265-3397) | .25   | 3098<br>(3047-3149) | 3162<br>(3106-3218) | 3313<br>(3258-3369) | <.001 | .01  |
| Cholesterol, mg/d                                   | 210<br>(204-216)    | 223<br>(216-229)    | 227<br>(220-233)    | <.001 | 238<br>(231-244)    | 242<br>(232-252)    | 248<br>(240-255)    | .05   | 262<br>(253-272)    | 265<br>(252-277)    | 275<br>(264-286)    | .08   | .25  |
| Fiber, g/d                                          | 12.4<br>(12.0-12.7) | 13.6<br>(13.2-14.0) | 15.0<br>(14.7-15.4) | <.001 | 11.4<br>(11.2-11.7) | 12.6<br>(12.4-12.9) | 14.0<br>(13.7-14.4) | <.001 | 14.0<br>(13.7-14.4) | 15.3<br>(15.0-15.6) | 16.7<br>(16.3-17.1) | <.001 | .99  |
| Potassium, mg/d                                     | 2260<br>(2209-2311) | 2291<br>(2252-2330) | 2318<br>(2283-2353) | .07   | 2092<br>(2054-2130) | 2142<br>(2109-2175) | 2199<br>(2167-2230) | <.001 | 2418<br>(2372-2464) | 2422<br>(2376-2468) | 2436<br>(2392-2480) | .56   | .05  |
| Calcium, mg/d                                       | 991<br>(961-1021)   | 1088<br>(1066-1109) | 1129<br>(1100-1157) | <.001 | 775<br>(758-793)    | 907<br>(884-931)    | 921<br>(895-947)    | <.001 | 964<br>(934-995)    | 1085<br>(1055-1115) | 1126<br>(1097-1154) | <.001 | .80  |

Abbreviation: NHANES, National Health and Nutrition Examination Survey.

<sup>a</sup> Data were weighted to be nationally representative. All analyses (except for macronutrients) were energy-adjusted to 2000 kcal/d using the residual method. Macronutrients were reported as % of total energy.

<sup>b</sup> Cooked fish and shellfish containing 500 mg or more of omega-3 fatty acids (EPA and DHA) per 3 ounces were included in the high omega-3 fatty acids category.

<sup>c</sup> Serving of sugar-sweetened beverage defined as 8 fl oz or 237 grams. Sugar-sweetened beverages include soft drinks, fruit drinks, sports drinks, presweetened teas and energy drinks with more than 50 kcal per 8 fl oz.

*P* for trend was estimated by treating survey-cycle as a continuous variable in a survey-weighted linear regression model. *P* for interaction was calculated using the Wald F test for an interaction term between survey-cycle and the categorical variable (race/ethnicity).

**eTable 16. Trends in Estimated Mean Consumption of Food Groups and Nutrients of Interest by Parental Education Levels Among US Children by NHANES Survey Cycles, 1999-2004, 2005-2010 and 2011-2016<sup>a</sup>**

| Foods/nutrients                          | <High School            |                         |                         |             | High school graduate/equivalent |                         |                         |             | Some College            |                         |                         |             | College graduate        |                         |                         |             | P for interaction |
|------------------------------------------|-------------------------|-------------------------|-------------------------|-------------|---------------------------------|-------------------------|-------------------------|-------------|-------------------------|-------------------------|-------------------------|-------------|-------------------------|-------------------------|-------------------------|-------------|-------------------|
|                                          | 1999-2004<br>(n= 4,277) | 2005-2010<br>(n= 3,101) | 2011-2016<br>(n= 2,231) | P for trend | 1999-2004<br>(n= 2,820)         | 2005-2010<br>(n= 2,408) | 2011-2016<br>(n= 1,956) | P for trend | 1999-2004<br>(n= 2,748) | 2005-2010<br>(n= 2,815) | 2011-2016<br>(n= 2,632) | P for trend | 1999-2004<br>(n= 1,599) | 2005-2010<br>(n= 1,711) | 2011-2016<br>(n= 1,940) | P for trend |                   |
| Total fruits, servings/d                 | 0.96<br>(0.88-1.04)     | 1.15<br>(1.08-1.22)     | 1.08<br>(0.99-1.17)     | .04         | 0.93<br>(0.84-1.02)             | 1.00<br>(0.93-1.07)     | 1.00<br>(0.90-1.09)     | .31         | 1.03<br>(0.96-1.11)     | 1.13<br>(1.04-1.22)     | 1.02<br>(0.96-1.08)     | .69         | 1.25<br>(1.14-1.36)     | 1.22<br>(1.13-1.31)     | 1.29<br>(1.20-1.39)     | .51         | .91               |
| Intact/whole fruit                       | 0.40<br>(0.36-0.45)     | 0.61<br>(0.56-0.65)     | 0.66<br>(0.58-0.74)     | <.001       | 0.38<br>(0.34-0.43)             | 0.54<br>(0.50-0.58)     | 0.59<br>(0.50-0.67)     | <.001       | 0.48<br>(0.43-0.54)     | 0.66<br>(0.59-0.73)     | 0.61<br>(0.57-0.65)     | <.001       | 0.63<br>(0.55-0.71)     | 0.81<br>(0.73-0.89)     | 0.90<br>(0.82-0.98)     | <.001       | .32               |
| 100% fruit juice                         | 0.64<br>(0.58-0.70)     | 0.67<br>(0.61-0.72)     | 0.53<br>(0.48-0.57)     | .004        | 0.62<br>(0.54-0.70)             | 0.55<br>(0.49-0.62)     | 0.53<br>(0.46-0.59)     | .09         | 0.61<br>(0.54-0.68)     | 0.58<br>(0.53-0.64)     | 0.50<br>(0.44-0.55)     | .01         | 0.69<br>(0.61-0.77)     | 0.49<br>(0.44-0.55)     | 0.45<br>(0.39-0.50)     | <.001       | .05               |
| Total vegetables, servings/d             | 1.02<br>(0.97-1.07)     | 0.96<br>(0.89-1.04)     | 0.95<br>(0.91-1.00)     | .04         | 1.05<br>(1.00-1.11)             | 0.97<br>(0.93-1.01)     | 0.98<br>(0.94-1.03)     | .04         | 1.04<br>(0.98-1.09)     | 0.95<br>(0.91-1.00)     | 0.95<br>(0.90-0.99)     | .01         | 0.99<br>(0.92-1.05)     | 1.02<br>(0.96-1.09)     | 1.00<br>(0.93-1.06)     | .86         | .22               |
| Dark-green vegetables                    | 0.03<br>(0.02-0.03)     | 0.03<br>(0.03-0.04)     | 0.05<br>(0.04-0.06)     | <.001       | 0.04<br>(0.03-0.05)             | 0.04<br>(0.03-0.05)     | 0.05<br>(0.03-0.06)     | .22         | 0.03<br>(0.03-0.04)     | 0.05<br>(0.04-0.06)     | 0.06<br>(0.05-0.07)     | <.001       | 0.05<br>(0.03-0.06)     | 0.06<br>(0.05-0.08)     | 0.09<br>(0.07-0.11)     | .001        | .03               |
| Tomatoes                                 | 0.27<br>(0.25-0.28)     | 0.24<br>(0.22-0.27)     | 0.22<br>(0.21-0.24)     | <.001       | 0.28<br>(0.25-0.31)             | 0.23<br>(0.21-0.25)     | 0.23<br>(0.21-0.25)     | .005        | 0.27<br>(0.25-0.29)     | 0.22<br>(0.21-0.24)     | 0.21<br>(0.20-0.23)     | <.001       | 0.27<br>(0.24-0.29)     | 0.24<br>(0.21-0.26)     | 0.21<br>(0.20-0.23)     | <.001       | .96               |
| Other red/orange vegetables              | 0.04<br>(0.03-0.04)     | 0.04<br>(0.03-0.05)     | 0.05<br>(0.04-0.06)     | .03         | 0.04<br>(0.03-0.05)             | 0.04<br>(0.03-0.05)     | 0.05<br>(0.04-0.06)     | .49         | 0.05<br>(0.04-0.05)     | 0.05<br>(0.05-0.06)     | 0.06<br>(0.05-0.07)     | .09         | 0.07<br>(0.06-0.09)     | 0.07<br>(0.06-0.08)     | 0.09<br>(0.08-0.10)     | .08         | .79               |
| White potatoes                           | 0.36<br>(0.33-0.39)     | 0.31<br>(0.28-0.34)     | 0.28<br>(0.25-0.31)     | <.001       | 0.36<br>(0.34-0.39)             | 0.34<br>(0.31-0.36)     | 0.30<br>(0.27-0.32)     | <.001       | 0.36<br>(0.32-0.40)     | 0.29<br>(0.27-0.32)     | 0.31<br>(0.28-0.34)     | .06         | 0.26<br>(0.23-0.29)     | 0.26<br>(0.24-0.29)     | 0.26<br>(0.23-0.28)     | .99         | .28               |
| Other starchy (e.g., corn)               | 0.06<br>(0.05-0.07)     | 0.06<br>(0.05-0.07)     | 0.06<br>(0.05-0.07)     | .38         | 0.06<br>(0.05-0.07)             | 0.06<br>(0.06-0.07)     | 0.06<br>(0.05-0.08)     | .88         | 0.07<br>(0.05-0.08)     | 0.05<br>(0.05-0.06)     | 0.06<br>(0.05-0.07)     | .43         | 0.05<br>(0.04-0.06)     | 0.07<br>(0.06-0.09)     | 0.05<br>(0.04-0.06)     | .97         | .63               |
| Other vegetables                         | 0.26<br>(0.23-0.28)     | 0.25<br>(0.21-0.29)     | 0.26<br>(0.24-0.28)     | .68         | 0.26<br>(0.24-0.29)             | 0.24<br>(0.22-0.26)     | 0.25<br>(0.23-0.28)     | .51         | 0.27<br>(0.24-0.29)     | 0.27<br>(0.24-0.29)     | 0.23<br>(0.21-0.25)     | .007        | 0.28<br>(0.25-0.31)     | 0.29<br>(0.26-0.32)     | 0.27<br>(0.24-0.30)     | .45         | .42               |
| Vegetables excluding potatoes/starchy    | 0.58<br>(0.55-0.61)     | 0.57<br>(0.50-0.63)     | 0.58<br>(0.55-0.62)     | .91         | 0.62<br>(0.58-0.67)             | 0.56<br>(0.52-0.59)     | 0.58<br>(0.55-0.62)     | .10         | 0.61<br>(0.58-0.65)     | 0.59<br>(0.56-0.62)     | 0.56<br>(0.53-0.59)     | .01         | 0.67<br>(0.62-0.72)     | 0.66<br>(0.61-0.71)     | 0.66<br>(0.60-0.71)     | .77         | .62               |
| Total grains, servings/d                 |                         |                         |                         |             |                                 |                         |                         |             |                         |                         |                         |             |                         |                         |                         |             |                   |
| Whole grains                             | 0.35<br>(0.31-0.40)     | 0.48<br>(0.44-0.52)     | 0.73<br>(0.67-0.79)     | <.001       | 0.46<br>(0.41-0.52)             | 0.52<br>(0.47-0.57)     | 0.77<br>(0.69-0.84)     | <.001       | 0.51<br>(0.48-0.55)     | 0.62<br>(0.57-0.68)     | 0.87<br>(0.82-0.93)     | <.001       | 0.67<br>(0.61-0.73)     | 0.75<br>(0.68-0.82)     | 1.09<br>(1.02-1.17)     | <.001       | .39               |
| Refined grains                           | 6.34<br>(6.17-6.51)     | 6.30<br>(6.13-6.47)     | 6.43<br>(6.25-6.60)     | .51         | 6.07<br>(5.89-6.26)             | 6.05<br>(5.92-6.18)     | 6.23<br>(6.10-6.36)     | .19         | 6.17<br>(6.02-6.32)     | 6.05<br>(5.91-6.19)     | 6.14<br>(5.99-6.28)     | .79         | 6.53<br>(6.36-6.70)     | 6.20<br>(6.05-6.36)     | 6.18<br>(6.01-6.35)     | .006        | .10               |
| Nuts and seeds, servings/d               | 0.25<br>(0.17-0.33)     | 0.27<br>(0.19-0.34)     | 0.27<br>(0.20-0.34)     | .67         | 0.33<br>(0.26-0.40)             | 0.31<br>(0.27-0.36)     | 0.27<br>(0.23-0.31)     | .12         | 0.31<br>(0.26-0.36)     | 0.41<br>(0.35-0.47)     | 0.40<br>(0.35-0.46)     | .02         | 0.44<br>(0.37-0.52)     | 0.41<br>(0.35-0.47)     | 0.50<br>(0.44-0.57)     | .20         | .01               |
| Legumes, servings/d                      | 0.09<br>(0.08-0.10)     | 0.10<br>(0.09-0.11)     | 0.12<br>(0.10-0.14)     | .01         | 0.06<br>(0.05-0.07)             | 0.05<br>(0.04-0.06)     | 0.08<br>(0.06-0.09)     | .07         | 0.05<br>(0.04-0.06)     | 0.05<br>(0.04-0.06)     | 0.06<br>(0.04-0.07)     | .49         | 0.05<br>(0.03-0.06)     | 0.06<br>(0.04-0.07)     | 0.06<br>(0.05-0.07)     | .21         | .20               |
| Total meat, serving/d                    |                         |                         |                         |             |                                 |                         |                         |             |                         |                         |                         |             |                         |                         |                         |             |                   |
| Processed meat                           | 0.26<br>(0.22-0.29)     | 0.24<br>(0.22-0.26)     | 0.25<br>(0.22-0.27)     | .53         | 0.26<br>(0.24-0.29)             | 0.26<br>(0.23-0.28)     | 0.24<br>(0.21-0.26)     | .13         | 0.23<br>(0.21-0.26)     | 0.26<br>(0.24-0.28)     | 0.28<br>(0.24-0.31)     | .04         | 0.22<br>(0.19-0.25)     | 0.25<br>(0.23-0.27)     | 0.27<br>(0.25-0.30)     | .009        | .03               |
| Unprocessed red meat                     | 0.39<br>(0.36-0.43)     | 0.36<br>(0.34-0.39)     | 0.32<br>(0.29-0.35)     | .003        | 0.35<br>(0.32-0.39)             | 0.36<br>(0.33-0.39)     | 0.35<br>(0.31-0.39)     | .92         | 0.36<br>(0.32-0.41)     | 0.32<br>(0.29-0.34)     | 0.32<br>(0.29-0.34)     | .11         | 0.29<br>(0.25-0.33)     | 0.29<br>(0.25-0.34)     | 0.26<br>(0.23-0.29)     | .20         | .56               |
| Poultry                                  | 0.29<br>(0.25-0.32)     | 0.37<br>(0.35-0.40)     | 0.37<br>(0.33-0.40)     | .001        | 0.30<br>(0.27-0.33)             | 0.38<br>(0.35-0.42)     | 0.38<br>(0.34-0.42)     | <.001       | 0.31<br>(0.28-0.35)     | 0.37<br>(0.33-0.40)     | 0.39<br>(0.35-0.42)     | .008        | 0.29<br>(0.24-0.33)     | 0.36<br>(0.32-0.40)     | 0.33<br>(0.29-0.38)     | .19         | .61               |
| Fish and Shellfish                       | 0.06<br>(0.05-0.08)     | 0.07<br>(0.06-0.09)     | 0.08<br>(0.06-0.09)     | .28         | 0.06<br>(0.05-0.08)             | 0.06<br>(0.05-0.08)     | 0.09<br>(0.05-0.12)     | .22         | 0.05<br>(0.04-0.06)     | 0.06<br>(0.05-0.08)     | 0.05<br>(0.03-0.07)     | .99         | 0.07<br>(0.05-0.09)     | 0.07<br>(0.05-0.09)     | 0.07<br>(0.05-0.09)     | .99         | .62               |
| High in omega-3 fatty acids <sup>b</sup> | 0.01<br>(0.006-0.02)    | 0.01<br>(0.008-0.02)    | 0.01<br>(0.008-0.02)    | .54         | 0.009<br>(0.006-0.01)           | 0.009<br>(0.006-0.02)   | 0.02<br>(0.01-0.02)     | .09         | 0.01<br>(0.007-0.02)    | 0.01<br>(0.008-0.01)    | 0.009<br>(0.006-0.01)   | .45         | 0.02<br>(0.01-0.03)     | 0.02<br>(0.01-0.03)     | 0.02<br>(0.01-0.03)     | .85         | .33               |
| Low in omega-3 fatty acids <sup>b</sup>  | 0.05<br>(0.04-0.07)     | 0.06<br>(0.05-0.07)     | 0.06<br>(0.05-0.08)     | .26         | 0.05<br>(0.04-0.07)             | 0.05<br>(0.04-0.07)     | 0.07<br>(0.04-0.10)     | .32         | 0.04<br>(0.03-0.05)     | 0.05<br>(0.03-0.07)     | 0.04<br>(0.03-0.06)     | .77         | 0.05<br>(0.03-0.07)     | 0.05<br>(0.04-0.06)     | 0.05<br>(0.04-0.07)     | .99         | .71               |
| Eggs, servings/d                         | 0.31<br>(0.27-0.35)     | 0.39<br>(0.35-0.44)     | 0.41<br>(0.37-0.45)     | .001        | 0.31<br>(0.26-0.35)             | 0.37<br>(0.33-0.41)     | 0.35<br>(0.31-0.38)     | .19         | 0.27<br>(0.24-0.30)     | 0.33<br>(0.30-0.37)     | 0.35<br>(0.32-0.38)     | <.001       | 0.23<br>(0.19-0.28)     | 0.36<br>(0.32-0.40)     | 0.38<br>(0.35-0.42)     | <.001       | .02               |



|                                                     |                     |                     |                     |       |                     |                     |                     |       |                     |                     |                     |       |                     |                     |                     |       |     |
|-----------------------------------------------------|---------------------|---------------------|---------------------|-------|---------------------|---------------------|---------------------|-------|---------------------|---------------------|---------------------|-------|---------------------|---------------------|---------------------|-------|-----|
| Total dairy, servings/d                             | 1.94<br>(1.85-2.03) | 2.22<br>(2.13-2.31) | 2.25<br>(2.12-2.37) | <.001 | 2.09<br>(1.98-2.20) | 2.17<br>(2.08-2.26) | 2.17<br>(2.06-2.29) | .27   | 2.19<br>(2.09-2.29) | 2.19<br>(2.12-2.27) | 2.20<br>(2.11-2.29) | .86   | 2.38<br>(2.27-2.50) | 2.48<br>(2.38-2.59) | 2.41<br>(2.28-2.53) | .81   | .63 |
| Milk                                                | 1.35<br>(1.27-1.42) | 1.41<br>(1.33-1.49) | 1.26<br>(1.17-1.35) | .18   | 1.41<br>(1.31-1.50) | 1.40<br>(1.31-1.49) | 1.24<br>(1.14-1.33) | .01   | 1.49<br>(1.39-1.59) | 1.36<br>(1.30-1.42) | 1.23<br>(1.16-1.30) | <.001 | 1.61<br>(1.51-1.71) | 1.59<br>(1.49-1.69) | 1.40<br>(1.31-1.49) | .002  | .06 |
| Cheese                                              | 0.53<br>(0.49-0.56) | 0.66<br>(0.63-0.69) | 0.82<br>(0.76-0.87) | <.001 | 0.62<br>(0.58-0.67) | 0.67<br>(0.63-0.71) | 0.79<br>(0.72-0.85) | <.001 | 0.63<br>(0.59-0.68) | 0.72<br>(0.68-0.76) | 0.82<br>(0.78-0.87) | <.001 | 0.63<br>(0.58-0.68) | 0.71<br>(0.66-0.75) | 0.81<br>(0.76-0.87) | <.001 | .69 |
| Yogurt                                              | 0.02<br>(0.01-0.02) | 0.03<br>(0.03-0.04) | 0.06<br>(0.04-0.07) | <.001 | 0.03<br>(0.02-0.03) | 0.03<br>(0.02-0.03) | 0.04<br>(0.03-0.05) | .04   | 0.04<br>(0.03-0.04) | 0.05<br>(0.04-0.06) | 0.06<br>(0.05-0.07) | .001  | 0.08<br>(0.06-0.11) | 0.08<br>(0.07-0.09) | 0.10<br>(0.08-0.11) | .31   | .63 |
| Sugar-sweetened beverages <sup>c</sup> , servings/d | 2.09<br>(1.91-2.26) | 1.49<br>(1.41-1.58) | 1.42<br>(1.29-1.55) | <.001 | 2.02<br>(1.90-2.15) | 1.70<br>(1.58-1.82) | 1.28<br>(1.17-1.39) | <.001 | 1.96<br>(1.83-2.08) | 1.57<br>(1.45-1.69) | 1.27<br>(1.17-1.36) | <.001 | 1.46<br>(1.34-1.58) | 1.14<br>(1.01-1.27) | 0.81<br>(0.69-0.94) | <.001 | .56 |
| Added sugar, g/d                                    | 101<br>(96.2-105)   | 81.1<br>(78.5-83.6) | 79.0<br>(74.3-83.2) | <.001 | 98.3<br>(94.5-102)  | 89.5<br>(86.1-92.8) | 78.1<br>(75.2-81.1) | <.001 | 100<br>(95.3-104)   | 86.5<br>(83.6-89.5) | 78.1<br>(75.6-80.6) | <.001 | 91.1<br>(87.4-94.9) | 79.0<br>(75.6-82.3) | 68.9<br>(66.4-71.4) | <.001 | .39 |
| Macronutrients                                      |                     |                     |                     |       |                     |                     |                     |       |                     |                     |                     |       |                     |                     |                     |       |     |
| Total fat, %Energy (E)                              | 33.0<br>(32.6-33.4) | 32.8<br>(32.3-33.3) | 33.2<br>(32.6-33.7) | .66   | 33.0<br>(32.5-33.5) | 33.3<br>(32.8-33.7) | 33.6<br>(33.0-34.1) | .15   | 32.0<br>(31.5-32.5) | 33.0<br>(32.5-33.4) | 33.4<br>(32.9-33.9) | <.001 | 31.4<br>(30.7-32.1) | 32.3<br>(31.9-32.8) | 33.3<br>(32.9-33.8) | <.001 | .02 |
| Saturated fat, %E                                   | 11.7<br>(11.5-11.9) | 11.6<br>(11.3-11.8) | 11.6<br>(11.3-11.8) | .45   | 11.6<br>(11.4-11.9) | 11.7<br>(11.5-11.8) | 11.5<br>(11.3-11.8) | .51   | 11.4<br>(11.2-11.6) | 11.6<br>(11.4-11.8) | 11.7<br>(11.4-11.9) | .09   | 11.1<br>(10.9-11.4) | 11.5<br>(11.3-11.7) | 11.7<br>(11.5-12.0) | <.001 | .01 |
| Monounsaturated fat, %E                             | 15.5<br>(14.8-16.2) | 15.0<br>(14.5-15.6) | 14.5<br>(13.9-15.0) | .03   | 14.2<br>(13.7-14.7) | 14.3<br>(13.9-14.7) | 14.9<br>(14.2-15.7) | .11   | 13.7(13.2-14.2)     | 14.0(13.6-14.4)     | 14.0(13.6-14.4)     | .36   | 13.4<br>(13.0-13.9) | 13.9<br>(13.4-14.4) | 13.4<br>(13.0-13.8) | .82   | .40 |
| Polysaturated fat, %E                               | 6.18<br>(6.03-6.32) | 6.57<br>(6.43-6.70) | 7.31<br>(7.18-7.45) | <.001 | 6.34<br>(6.16-6.52) | 6.67<br>(6.50-6.84) | 7.70<br>(7.53-7.87) | <.001 | 6.10<br>(5.95-6.26) | 6.63<br>(6.49-6.76) | 7.38<br>(7.19-7.58) | <.001 | 6.09<br>(5.89-6.30) | 6.46<br>(6.27-6.64) | 7.36<br>(7.18-7.55) | <.001 | .98 |
| Seafood omega-3 fat, mg/d                           | 48.6<br>(41.5-55.8) | 56.9<br>(48.2-65.6) | 47.7<br>(40.1-55.4) | .92   | 54.2<br>(42.9-65.6) | 52.4<br>(43.1-61.8) | 47.9<br>(31.2-64.6) | .54   | 46.7<br>(39.9-53.5) | 54.4<br>(44.0-64.8) | 38.5<br>(31.5-45.4) | .08   | 69.1<br>(53.5-84.8) | 68.8<br>(46.8-90.7) | 45.1<br>(37.5-52.7) | .004  | .38 |
| Plant omega-3 fat, mg/d                             | 121<br>(117-124)    | 122<br>(119-125)    | 144<br>(140-147)    | <.001 | 118<br>(114-122)    | 120<br>(117-124)    | 149<br>(145-153)    | <.001 | 117<br>(113-121)    | 121<br>(117-124)    | 142<br>(138-145)    | <.001 | 116<br>(110-122)    | 120<br>(115-124)    | 145<br>(141-149)    | <.001 | .78 |
| Protein, %E                                         | 13.7<br>(13.4-14.0) | 14.8<br>(14.6-15.0) | 14.9<br>(14.6-15.1) | <.001 | 13.7<br>(13.4-13.9) | 14.4<br>(14.1-14.6) | 14.8<br>(14.6-15.1) | <.001 | 13.9<br>(13.5-14.1) | 14.3<br>(14.0-14.5) | 14.7<br>(14.4-15.0) | <.001 | 14.1<br>(13.8-14.3) | 14.9<br>(14.6-15.2) | 14.9<br>(14.7-15.1) | <.001 | .38 |
| Carbohydrate, %E                                    | 54.2<br>(53.7-54.6) | 53.3<br>(52.7-53.8) | 53.0<br>(52.4-53.7) | .004  | 54.1<br>(53.4-54.8) | 53.4<br>(53.0-53.8) | 52.7<br>(52.0-53.3) | .003  | 55.1<br>(54.5-55.8) | 53.7<br>(53.1-54.4) | 52.9<br>(52.3-53.6) | <.001 | 55.7<br>(55.1-56.4) | 54.0<br>(53.3-54.6) | 53.0<br>(52.5-53.5) | <.001 | .04 |
| Other nutrients                                     |                     |                     |                     |       |                     |                     |                     |       |                     |                     |                     |       |                     |                     |                     |       |     |
| Sodium, mg/d                                        | 3172<br>(3116-3227) | 3282<br>(3242-3322) | 3286<br>(3218-3354) | .01   | 3181<br>(3116-3246) | 3273<br>(3214-3332) | 3365<br>(3302-3429) | <.001 | 3163<br>(3113-3213) | 3292<br>(3240-3343) | 3333<br>(3228-3438) | .006  | 3157<br>(3094-3220) | 3322<br>(3270-3373) | 3278<br>(3227-3330) | .008  | .79 |
| Cholesterol, mg/d                                   | 241<br>(231-250)    | 253<br>(243-263)    | 258<br>(248-269)    | .02   | 229<br>(219-238)    | 241<br>(232-250)    | 244<br>(232-255)    | .04   | 219<br>(212-226)    | 225<br>(217-234)    | 240<br>(232-247)    | <.001 | 206<br>(195-216)    | 228<br>(217-238)    | 232<br>(222-242)    | .001  | .11 |
| Fiber, g/d                                          | 12.2<br>(11.8-12.5) | 14.0<br>(13.7-14.4) | 15.6<br>(15.1-16.1) | <.001 | 12.0<br>(11.7-12.3) | 13.0<br>(12.7-13.3) | 14.6<br>(14.2-15.0) | <.001 | 12.2<br>(11.8-12.6) | 13.6<br>(13.3-13.9) | 14.7<br>(14.4-15.0) | <.001 | 13.4<br>(12.9-13.9) | 14.6<br>(14.2-15.0) | 16.3<br>(15.9-16.8) | <.001 | .54 |
| Potassium, mg/d                                     | 2209<br>(2155-2263) | 2341<br>(2299-2383) | 2347<br>(2299-2396) | <.001 | 2224<br>(2172-2277) | 2239<br>(2192-2286) | 2298<br>(2257-2338) | .04   | 2248<br>(2191-2305) | 2241<br>(2203-2279) | 2282<br>(2249-2315) | .29   | 2350<br>(2283-2417) | 2398<br>(2341-2456) | 2408<br>(2355-2460) | .19   | .72 |
| calcium, mg/d                                       | 873<br>(846-900)    | 1033<br>(1008-1059) | 1086<br>(1049-1123) | <.001 | 921<br>(890-952)    | 1014<br>(987-1041)  | 1046<br>(1015-1077) | <.001 | 958<br>(923-992)    | 1041<br>(1017-1065) | 1068<br>(1039-1096) | <.001 | 1046<br>(1010-1082) | 1145<br>(1108-1181) | 1154<br>(1116-1192) | <.001 | .82 |

Abbreviation: NHANES, National Health and Nutrition Examination Survey.

<sup>a</sup> Data were weighted to be nationally representative. All analyses (except for macronutrients) were energy-adjusted to 2000 kcal/d using the residual method. Macronutrients were reported as % of total energy.

<sup>b</sup> Cooked fish and shellfish containing 500 mg or more of omega-3 fatty acids (EPA and DHA) per 3 ounces were included in the high omega-3 fatty acids category.

<sup>c</sup> Serving of sugar-sweetened beverage defined as 8 fl oz or 237 grams. Sugar-sweetened beverages include soft drinks, fruit drinks, sports drinks, presweetened teas and energy drinks with more than 50 kcal per 8 fl oz.

*P* for trend was estimated by treating survey-cycle as a continuous variable in a survey-weighted linear regression model. *P* for interaction was calculated using the Wald F test for an interaction term between survey-cycle and the categorical variable (parental education levels).

**eTable 17. Trends in Estimated Mean Consumption of Food Groups and Nutrients of Interest by Family Income to Poverty Ratio (PIR) Among US Children by NHANES Survey Cycles, 1999-2004, 2005-2010 and 2011-2016<sup>a</sup>**

| Foods/nutrients                          | PIR <1.30               |                         |                        | P for trend | PIR 1.30-1.849         |                        |                        | P for trend | PIR 1.85-2.99          |                        |                        | P for trend | PIR ≥3.00              |                        |                        | P for trend | P for interaction |
|------------------------------------------|-------------------------|-------------------------|------------------------|-------------|------------------------|------------------------|------------------------|-------------|------------------------|------------------------|------------------------|-------------|------------------------|------------------------|------------------------|-------------|-------------------|
|                                          | 1999-2004<br>(n= 4,941) | 2005-2010<br>(n= 4,298) | 2011-2016<br>(n=3,829) |             | 1999-2004<br>(n=1,479) | 2005-2010<br>(n=1,228) | 2011-2016<br>(n=1,106) |             | 1999-2004<br>(n=1,869) | 2005-2010<br>(n=1,660) | 2011-2016<br>(n=1,358) |             | 1999-2004<br>(n=2,665) | 2005-2010<br>(n=2,523) | 2011-2016<br>(n=2,071) |             |                   |
| Total fruits, servings/d                 | 1.04<br>(0.95-1.12)     | 1.15<br>(1.08-1.22)     | 1.03<br>(0.97-1.10)    | .88         | 0.97<br>(0.85-1.10)    | 1.01<br>(0.92-1.10)    | 1.04<br>(0.94-1.14)    | .39         | 0.93<br>(0.84-1.02)    | 1.09<br>(0.97-1.21)    | 1.08<br>(0.97-1.19)    | .04         | 1.12<br>(1.06-1.19)    | 1.12<br>(1.05-1.18)    | 1.21<br>(1.12-1.30)    | .12         | .22               |
| Intact/whole fruit                       | 0.43<br>(0.40-0.47)     | 0.62<br>(0.57-0.67)     | 0.60<br>(0.55-0.64)    | <.001       | 0.42<br>(0.33-0.52)    | 0.54<br>(0.48-0.60)    | 0.62<br>(0.55-0.69)    | .001        | 0.44<br>(0.36-0.52)    | 0.62<br>(0.51-0.72)    | 0.67<br>(0.58-0.75)    | <.001       | 0.55<br>(0.50-0.61)    | 0.71<br>(0.65-0.77)    | 0.84<br>(0.76-0.92)    | <.001       | .15               |
| 100% fruit juice                         | 0.68<br>(0.61-0.74)     | 0.64<br>(0.58-0.69)     | 0.55<br>(0.50-0.60)    | .002        | 0.63<br>(0.55-0.71)    | 0.56<br>(0.50-0.63)    | 0.54<br>(0.45-0.63)    | .14         | 0.54<br>(0.47-0.62)    | 0.58<br>(0.48-0.68)    | 0.47<br>(0.41-0.53)    | .12         | 0.65<br>(0.59-0.70)    | 0.48<br>(0.44-0.52)    | 0.44<br>(0.39-0.49)    | <.001       | .10               |
| Total vegetables, servings/d             | 1.10<br>(1.05-1.15)     | 0.98<br>(0.94-1.02)     | 0.95<br>(0.92-0.99)    | <.001       | 1.03<br>(0.95-1.12)    | 0.99<br>(0.90-1.09)    | 1.01<br>(0.93-1.10)    | .79         | 1.01<br>(0.96-1.06)    | 0.95<br>(0.88-1.01)    | 0.95<br>(0.90-1.01)    | .13         | 0.97<br>(0.92-1.03)    | 0.98<br>(0.95-1.02)    | 0.97<br>(0.91-1.02)    | .89         | .02               |
| Dark-green vegetables                    | 0.04<br>(0.03-0.05)     | 0.04<br>(0.03-0.05)     | 0.06<br>(0.04-0.07)    | .01         | 0.04<br>(0.02-0.05)    | 0.05<br>(0.03-0.07)    | 0.06<br>(0.04-0.08)    | .10         | 0.03<br>(0.03-0.04)    | 0.05<br>(0.04-0.06)    | 0.05<br>(0.04-0.06)    | .002        | 0.04<br>(0.03-0.05)    | 0.05<br>(0.05-0.06)    | 0.08<br>(0.06-0.09)    | .001        | .59               |
| Tomatoes                                 | 0.28<br>(0.25-0.30)     | 0.24<br>(0.23-0.25)     | 0.23<br>(0.22-0.24)    | <.001       | 0.28<br>(0.24-0.31)    | 0.22<br>(0.18-0.27)    | 0.24<br>(0.21-0.27)    | .10         | 0.27<br>(0.24-0.31)    | 0.22<br>(0.20-0.24)    | 0.21<br>(0.19-0.23)    | <.001       | 0.26<br>(0.24-0.28)    | 0.23<br>(0.22-0.25)    | 0.21<br>(0.19-0.22)    | <.001       | .84               |
| Other red/orange vegetables              | 0.05<br>(0.04-0.06)     | 0.05<br>(0.04-0.05)     | 0.05<br>(0.04-0.05)    | .85         | 0.05<br>(0.03-0.07)    | 0.04<br>(0.03-0.05)    | 0.06<br>(0.04-0.08)    | .38         | 0.05<br>(0.03-0.06)    | 0.05<br>(0.04-0.06)    | 0.06<br>(0.04-0.07)    | .33         | 0.05<br>(0.04-0.06)    | 0.07<br>(0.06-0.07)    | 0.08<br>(0.07-0.09)    | .001        | .03               |
| White potatoes                           | 0.39<br>(0.36-0.41)     | 0.32<br>(0.30-0.34)     | 0.29<br>(0.27-0.31)    | <.001       | 0.35<br>(0.29-0.40)    | 0.32<br>(0.28-0.36)    | 0.30<br>(0.26-0.33)    | .13         | 0.34<br>(0.30-0.37)    | 0.29<br>(0.25-0.33)    | 0.32<br>(0.28-0.36)    | .64         | 0.29<br>(0.26-0.32)    | 0.27<br>(0.25-0.29)    | 0.26<br>(0.23-0.29)    | .15         | .02               |
| Other starchy (e.g., corn)               | 0.07<br>(0.06-0.08)     | 0.06<br>(0.06-0.07)     | 0.06<br>(0.05-0.07)    | .06         | 0.05<br>(0.03-0.07)    | 0.06<br>(0.05-0.08)    | 0.05<br>(0.04-0.07)    | .92         | 0.06<br>(0.05-0.08)    | 0.06<br>(0.05-0.07)    | 0.05<br>(0.04-0.06)    | .31         | 0.05<br>(0.04-0.07)    | 0.06<br>(0.05-0.07)    | 0.05<br>(0.04-0.06)    | .89         | .59               |
| Other vegetables                         | 0.27<br>(0.25-0.29)     | 0.24<br>(0.23-0.26)     | 0.24<br>(0.22-0.26)    | .06         | 0.25<br>(0.22-0.28)    | 0.27<br>(0.22-0.32)    | 0.27<br>(0.23-0.30)    | .58         | 0.25<br>(0.22-0.28)    | 0.26<br>(0.21-0.30)    | 0.23<br>(0.21-0.26)    | .37         | 0.27<br>(0.25-0.30)    | 0.28<br>(0.26-0.30)    | 0.26<br>(0.23-0.28)    | .35         | .58               |
| Vegetables excluding potatoes/starchy    | 0.63<br>(0.59-0.68)     | 0.57<br>(0.54-0.61)     | 0.58<br>(0.55-0.60)    | .03         | 0.61<br>(0.56-0.66)    | 0.59<br>(0.51-0.67)    | 0.63<br>(0.56-0.70)    | .76         | 0.61<br>(0.56-0.65)    | 0.57<br>(0.52-0.63)    | 0.55<br>(0.52-0.59)    | .07         | 0.62<br>(0.59-0.65)    | 0.63<br>(0.60-0.66)    | 0.62<br>(0.58-0.66)    | .90         | .32               |
| Total grains, servings/d                 |                         |                         |                        |             |                        |                        |                        |             |                        |                        |                        |             |                        |                        |                        |             |                   |
| Whole grains                             | 0.41<br>(0.36-0.46)     | 0.52<br>(0.47-0.58)     | 0.77<br>(0.71-0.84)    | <.001       | 0.42<br>(0.36-0.48)    | 0.56<br>(0.50-0.62)    | 0.83<br>(0.74-0.92)    | <.001       | 0.52<br>(0.45-0.59)    | 0.62<br>(0.54-0.70)    | 0.91<br>(0.82-0.99)    | <.001       | 0.60<br>(0.54-0.66)    | 0.65<br>(0.60-0.70)    | 1.01<br>(0.94-1.09)    | <.001       | .85               |
| Refined grains                           | 6.19<br>(6.02-6.36)     | 6.12<br>(6.00-6.24)     | 6.33<br>(6.20-6.46)    | .20         | 6.21<br>(5.92-6.50)    | 6.07<br>(5.84-6.30)    | 6.09<br>(5.88-6.30)    | .40         | 6.15<br>(5.92-6.38)    | 5.97<br>(5.78-6.16)    | 6.10<br>(5.84-6.36)    | .77         | 6.37<br>(6.24-6.50)    | 6.29<br>(6.12-6.45)    | 6.19<br>(6.06-6.33)    | .06         | .11               |
| Nuts and seeds, servings/d               | 0.28<br>(0.22-0.35)     | 0.26<br>(0.22-0.30)     | 0.25<br>(0.21-0.28)    | .34         | 0.24<br>(0.17-0.30)    | 0.36<br>(0.27-0.44)    | 0.40<br>(0.29-0.51)    | .007        | 0.41<br>(0.30-0.52)    | 0.38<br>(0.30-0.45)    | 0.39<br>(0.30-0.48)    | .81         | 0.37<br>(0.32-0.42)    | 0.45<br>(0.39-0.50)    | 0.51<br>(0.44-0.58)    | .002        | <.001             |
| Legumes, servings/d                      | 0.08<br>(0.07-0.09)     | 0.07<br>(0.06-0.08)     | 0.09<br>(0.08-0.11)    | .12         | 0.06<br>(0.04-0.08)    | 0.07<br>(0.05-0.08)    | 0.08<br>(0.06-0.09)    | .18         | 0.05<br>(0.04-0.07)    | 0.06<br>(0.04-0.07)    | 0.07<br>(0.05-0.09)    | .24         | 0.04<br>(0.03-0.05)    | 0.05<br>(0.04-0.06)    | 0.05<br>(0.04-0.06)    | .36         | .74               |
| Total meat, serving/d                    |                         |                         |                        |             |                        |                        |                        |             |                        |                        |                        |             |                        |                        |                        |             |                   |
| Processed meat                           | 0.25<br>(0.22-0.27)     | 0.25<br>(0.24-0.27)     | 0.24<br>(0.22-0.26)    | .69         | 0.26<br>(0.22-0.29)    | 0.24<br>(0.21-0.27)    | 0.25<br>(0.22-0.28)    | .84         | 0.23<br>(0.21-0.25)    | 0.25<br>(0.22-0.27)    | 0.28<br>(0.25-0.30)    | .01         | 0.24<br>(0.22-0.27)    | 0.26<br>(0.24-0.28)    | 0.28<br>(0.26-0.31)    | .04         | .11               |
| Unprocessed red meat                     | 0.37<br>(0.34-0.40)     | 0.35<br>(0.33-0.37)     | 0.32<br>(0.30-0.34)    | .03         | 0.33<br>(0.27-0.38)    | 0.34<br>(0.28-0.39)    | 0.31<br>(0.25-0.37)    | .66         | 0.34<br>(0.31-0.37)    | 0.33<br>(0.29-0.36)    | 0.33<br>(0.29-0.38)    | .84         | 0.33<br>(0.30-0.36)    | 0.33<br>(0.29-0.36)    | 0.28<br>(0.25-0.31)    | .01         | .41               |
| Poultry                                  | 0.32<br>(0.29-0.35)     | 0.39<br>(0.36-0.41)     | 0.40<br>(0.36-0.43)    | .001        | 0.30<br>(0.24-0.36)    | 0.36<br>(0.32-0.39)    | 0.38<br>(0.34-0.42)    | .03         | 0.27<br>(0.23-0.30)    | 0.36<br>(0.31-0.40)    | 0.33<br>(0.28-0.38)    | .04         | 0.29<br>(0.26-0.31)    | 0.35<br>(0.32-0.38)    | 0.34<br>(0.30-0.38)    | .02         | .91               |
| Fish and Shellfish                       | 0.07<br>(0.05-0.08)     | 0.06<br>(0.05-0.08)     | 0.06<br>(0.05-0.08)    | .68         | 0.05<br>(0.03-0.07)    | 0.07<br>(0.05-0.09)    | 0.08<br>(0.04-0.13)    | .24         | 0.06<br>(0.04-0.07)    | 0.07<br>(0.04-0.11)    | 0.07<br>(0.04-0.09)    | .67         | 0.06<br>(0.05-0.08)    | 0.06<br>(0.05-0.07)    | 0.07<br>(0.05-0.09)    | .55         | .52               |
| High in omega-3 fatty acids <sup>b</sup> | 0.01<br>(0.008-0.02)    | 0.01<br>(0.008-0.01)    | 0.01<br>(0.008-0.01)   | .78         | 0.006<br>(0.003-0.01)  | 0.01<br>(0.006-0.02)   | 0.01<br>(0.007-0.02)   | .14         | 0.01<br>(0.007-0.02)   | 0.01<br>(0.005-0.02)   | 0.02<br>(0.008-0.02)   | .45         | 0.02<br>(0.01-0.02)    | 0.02<br>(0.01-0.02)    | 0.02<br>(0.01-0.02)    | .89         | .54               |
| Low in omega-3 fatty acids <sup>b</sup>  | 0.06<br>(0.04-0.07)     | 0.05<br>(0.04-0.06)     | 0.05<br>(0.04-0.07)    | .72         | 0.05<br>(0.03-0.07)    | 0.06<br>(0.04-0.08)    | 0.07<br>(0.02-0.12)    | .32         | 0.05<br>(0.03-0.06)    | 0.06<br>(0.03-0.09)    | 0.05<br>(0.02-0.07)    | .79         | 0.05<br>(0.03-0.06)    | 0.04<br>(0.04-0.05)    | 0.06<br>(0.04-0.07)    | .51         | .62               |
| Eggs, servings/d                         | 0.32<br>(0.28-0.36)     | 0.38<br>(0.35-0.42)     | 0.39<br>(0.36-0.42)    | .007        | 0.28<br>(0.22-0.35)    | 0.36<br>(0.31-0.41)    | 0.41<br>(0.36-0.47)    | .002        | 0.25<br>(0.21-0.29)    | 0.36<br>(0.32-0.40)    | 0.35<br>(0.30-0.39)    | .002        | 0.25<br>(0.22-0.28)    | 0.34<br>(0.31-0.38)    | 0.34<br>(0.31-0.37)    | <.001       | .59               |

|                                                     |                     |                     |                     |       |                     |                     |                     |       |                     |                     |                     |       |                     |                     |                     |       |     |
|-----------------------------------------------------|---------------------|---------------------|---------------------|-------|---------------------|---------------------|---------------------|-------|---------------------|---------------------|---------------------|-------|---------------------|---------------------|---------------------|-------|-----|
| Total dairy, servings/d                             | 2.00<br>(1.90-2.11) | 2.18<br>(2.11-2.26) | 2.20<br>(2.09-2.31) | .01   | 2.16<br>(1.98-2.34) | 2.25<br>(2.16-2.34) | 2.18<br>(2.04-2.32) | .83   | 2.20<br>(2.10-2.29) | 2.26<br>(2.16-2.36) | 2.26<br>(2.16-2.37) | .35   | 2.25<br>(2.14-2.36) | 2.35<br>(2.28-2.42) | 2.37<br>(2.24-2.50) | .16   | .35 |
| Milk                                                | 1.38<br>(1.28-1.48) | 1.40<br>(1.33-1.46) | 1.25<br>(1.17-1.34) | .06   | 1.42<br>(1.30-1.55) | 1.42<br>(1.35-1.49) | 1.25<br>(1.12-1.37) | .04   | 1.53<br>(1.44-1.62) | 1.43<br>(1.34-1.53) | 1.26<br>(1.17-1.35) | <.001 | 1.49<br>(1.40-1.59) | 1.48<br>(1.42-1.55) | 1.36<br>(1.26-1.45) | .04   | .27 |
| Cheese                                              | 0.56<br>(0.52-0.60) | 0.66<br>(0.63-0.68) | 0.79<br>(0.75-0.83) | <.001 | 0.65<br>(0.57-0.73) | 0.70<br>(0.62-0.77) | 0.78<br>(0.72-0.85) | .01   | 0.60<br>(0.55-0.65) | 0.70<br>(0.65-0.76) | 0.84<br>(0.79-0.89) | <.001 | 0.65<br>(0.61-0.69) | 0.72<br>(0.68-0.76) | 0.83<br>(0.78-0.89) | <.001 | .13 |
| Yogurt                                              | 0.02<br>(0.02-0.03) | 0.04<br>(0.03-0.04) | 0.05<br>(0.04-0.05) | <.001 | 0.03<br>(0.01-0.05) | 0.03<br>(0.02-0.04) | 0.06<br>(0.04-0.07) | .02   | 0.03<br>(0.02-0.04) | 0.05<br>(0.04-0.06) | 0.07<br>(0.05-0.08) | <.001 | 0.06<br>(0.05-0.08) | 0.06<br>(0.05-0.07) | 0.09<br>(0.07-0.10) | .04   | .49 |
| Sugar-sweetened beverages <sup>c</sup> , servings/d | 1.98<br>(1.85-2.12) | 1.61<br>(1.50-1.71) | 1.31<br>(1.19-1.42) | <.001 | 1.99<br>(1.81-2.18) | 1.55<br>(1.32-1.78) | 1.26<br>(1.14-1.38) | <.001 | 1.94<br>(1.77-2.11) | 1.56<br>(1.40-1.72) | 1.22<br>(1.08-1.35) | <.001 | 1.80<br>(1.69-1.91) | 1.35<br>(1.24-1.45) | 0.98<br>(0.85-1.12) | <.001 | .74 |
| Added sugar, g/d                                    | 96.2<br>(92.4-100)  | 85.3<br>(82.3-88.2) | 76.9<br>(73.9-79.8) | <.001 | 101<br>(94.5-108)   | 86.9<br>(81.5-92.4) | 77.7<br>(73.9-81.5) | <.001 | 104<br>(99.1-109)   | 87.4<br>(83.6-91.6) | 77.3<br>(74.3-80.2) | <.001 | 95.8<br>(92.4-99.1) | 81.9<br>(79.4-84.8) | 73.1<br>(70.6-75.6) | <.001 | .16 |
| Macronutrients                                      |                     |                     |                     |       |                     |                     |                     |       |                     |                     |                     |       |                     |                     |                     |       |     |
| Total fat, %Energy (E)                              | 32.8<br>(32.4-33.3) | 32.8<br>(32.4-33.1) | 33.3<br>(32.9-33.7) | .13   | 32.4<br>(31.6-33.3) | 33.0<br>(32.5-33.5) | 33.3<br>(32.6-34.0) | .10   | 32.3<br>(31.7-32.9) | 33.1<br>(32.5-33.7) | 33.7<br>(33.1-34.3) | .001  | 31.9<br>(31.3-32.4) | 32.9<br>(32.5-33.3) | 33.4<br>(33.0-33.9) | <.001 | .11 |
| Saturated fat, %E                                   | 11.6<br>(11.4-11.8) | 11.5<br>(11.3-11.6) | 11.5<br>(11.3-11.7) | .71   | 11.6<br>(11.2-12.0) | 11.6<br>(11.3-11.9) | 11.5<br>(11.1-11.8) | .47   | 11.5<br>(11.2-11.8) | 11.8<br>(11.6-12.0) | 11.9<br>(11.5-12.2) | .09   | 11.2<br>(11.1-11.4) | 11.6<br>(11.4-11.8) | 11.8<br>(11.6-12.0) | .001  | .03 |
| Monounsaturated fat, %E                             | 14.8<br>(14.3-15.3) | 14.6<br>(14.2-15.0) | 14.4<br>(14.0-14.8) | .26   | 14.7<br>(14.0-15.4) | 14.6<br>(14.0-15.2) | 14.6<br>(13.7-15.4) | .77   | 14.0<br>(13.4-14.6) | 14.6<br>(13.9-15.3) | 14.4<br>(13.6-15.2) | .40   | 13.6<br>(13.1-14.1) | 13.7<br>(13.4-14.1) | 13.5<br>(13.0-13.9) | .67   | .49 |
| Polyunsaturated fat, %E                             | 6.28<br>(6.17-6.40) | 6.61<br>(6.50-6.71) | 7.46<br>(7.32-7.60) | <.001 | 6.00<br>(5.70-6.30) | 6.65<br>(6.45-6.85) | 7.56<br>(7.27-7.85) | <.001 | 6.18<br>(6.00-6.35) | 6.52<br>(6.30-6.73) | 7.42<br>(7.22-7.63) | <.001 | 6.16<br>(5.96-6.36) | 6.57<br>(6.41-6.73) | 7.35<br>(7.17-7.52) | <.001 | .59 |
| Seafood omega-3 fat, mg/d                           | 58.1<br>(49.5-66.8) | 54.3<br>(46.5-62.0) | 40.3<br>(35.3-45.4) | .001  | 47.3<br>(38.6-56.0) | 52.0<br>(39.3-64.6) | 48.9<br>(21.2-76.7) | .92   | 50.3<br>(38.6-62.1) | 57.8<br>(42.0-73.4) | 48.9<br>(35.8-62.0) | .87   | 57.3<br>(45.3-69.4) | 57.6<br>(45.7-69.5) | 42.2<br>(35.2-49.3) | .03   | .26 |
| Plant omega-3 fat, mg/d                             | 120<br>(117-123)    | 121<br>(119-124)    | 146<br>(144-148)    | <.001 | 116<br>(110-122)    | 121<br>(116-126)    | 148<br>(140-156)    | <.001 | 118<br>(114-122)    | 118<br>(113-123)    | 144<br>(139-148)    | <.001 | 116<br>(111-121)    | 120<br>(117-123)    | 142<br>(138-146)    | <.001 | .90 |
| Protein, %E                                         | 13.8<br>(13.5-14.1) | 14.6<br>(14.4-14.8) | 14.8<br>(14.6-15.0) | <.001 | 13.7<br>(13.3-14.1) | 14.5<br>(14.1-14.9) | 14.9<br>(14.6-15.2) | <.001 | 13.5<br>(13.2-13.8) | 14.4<br>(14.2-14.6) | 14.7<br>(14.4-15.0) | <.001 | 13.9<br>(13.6-14.2) | 14.6<br>(14.4-14.9) | 14.9<br>(14.6-15.1) | <.001 | .69 |
| Carbohydrate, %E                                    | 54.3<br>(53.9-54.8) | 53.6<br>(53.2-54.0) | 53.0<br>(52.5-53.4) | <.001 | 54.5<br>(53.5-55.5) | 53.5<br>(52.7-54.3) | 52.9<br>(52.1-53.8) | .02   | 55.3<br>(54.6-56.0) | 53.4<br>(52.7-54.1) | 52.6<br>(51.9-53.3) | <.001 | 55.2<br>(54.6-55.9) | 53.6<br>(53.1-54.1) | 52.9<br>(52.4-53.4) | <.001 | .13 |
| Other nutrients                                     |                     |                     |                     |       |                     |                     |                     |       |                     |                     |                     |       |                     |                     |                     |       |     |
| Sodium, mg/d                                        | 3168<br>(3105-3230) | 3288<br>(3243-3333) | 3357<br>(3252-3463) | .003  | 3202<br>(3120-3285) | 3262<br>(3179-3346) | 3345<br>(3257-3434) | .02   | 3129<br>(3077-3181) | 3241<br>(3174-3308) | 3295<br>(3221-3369) | <.001 | 3161<br>(3110-3212) | 3346<br>(3284-3408) | 3279<br>(3227-3331) | .002  | .65 |
| Cholesterol, mg/d                                   | 237<br>(228-246)    | 246<br>(237-254)    | 251<br>(243-258)    | .02   | 229<br>(213-245)    | 239<br>(226-253)    | 254<br>(242-266)    | .02   | 211<br>(201-220)    | 235<br>(226-244)    | 241<br>(228-253)    | <.001 | 211<br>(204-218)    | 224<br>(214-234)    | 230<br>(222-238)    | <.001 | .35 |
| Fiber, g/d                                          | 12.4<br>(12.1-12.7) | 13.6<br>(13.2-14.0) | 15.1<br>(14.6-15.5) | <.001 | 12.1<br>(11.4-12.9) | 13.5<br>(13.0-14.1) | 15.1<br>(14.7-15.6) | <.001 | 12.1<br>(11.6-12.6) | 13.4<br>(12.9-13.9) | 15.1<br>(14.7-15.4) | <.001 | 12.7<br>(12.4-13.0) | 14.0<br>(13.7-14.3) | 15.7<br>(15.2-16.1) | <.001 | .77 |
| Potassium, mg/d                                     | 2274<br>(2221-2327) | 2304<br>(2262-2347) | 2318<br>(2283-2353) | .17   | 2213<br>(2125-2302) | 2290<br>(2214-2367) | 2316<br>(2267-2364) | .05   | 2214<br>(2158-2271) | 2236<br>(2185-2288) | 2319<br>(2262-2377) | .01   | 2270<br>(2218-2321) | 2309<br>(2280-2338) | 2364<br>(2315-2413) | .01   | .34 |
| Calcium, mg/d                                       | 896<br>(865-926)    | 1027<br>(1003-1052) | 1061<br>(1031-1091) | <.001 | 949<br>(896-1002)   | 1035<br>(1004-1067) | 1062<br>(1016-1108) | .002  | 950<br>(920-980)    | 1047<br>(1017-1078) | 1087<br>(1056-1118) | <.001 | 998<br>(963-1033)   | 1094<br>(1070-1118) | 1136<br>(1092-1179) | <.001 | .47 |

Abbreviation: NHANES, National Health and Nutrition Examination Survey.

<sup>a</sup> Data were weighted to be nationally representative. All analyses (except for macronutrients) were energy-adjusted to 2000 kcal/d using the residual method. Macronutrients were reported as % of total energy.

<sup>b</sup> Cooked fish and shellfish containing 500 mg or more of omega-3 fatty acids (EPA and DHA) per 3 ounces were included in the high omega-3 fatty acids category.

<sup>c</sup> Serving of sugar-sweetened beverage defined as 8 fl oz or 237 grams. Sugar-sweetened beverages include soft drinks, fruit drinks, sports drinks, presweetened teas and energy drinks with more than 50 kcal per 8 fl oz.

*P* for trend was estimated by treating survey-cycle as a continuous variable in a survey-weighted linear regression model. *P* for interaction was calculated using the Wald F test for an interaction term between survey-cycle and the categorical variable (family income to poverty ratio levels).

**eTable 18. Trends in Estimated Mean Consumption of Food Groups and Nutrients of Interest by Household Food Security Status Among US Children by NHANES Survey Cycles, 1999-2004, 2005-2010 and 2011-2014<sup>a</sup>**

| Foods/nutrients                       | Very low food security |                      |                      |             | Low food security      |                        |                        |             | Marginal food security |                        |                      |             | Food secure            |                        |                        |             |                   |
|---------------------------------------|------------------------|----------------------|----------------------|-------------|------------------------|------------------------|------------------------|-------------|------------------------|------------------------|----------------------|-------------|------------------------|------------------------|------------------------|-------------|-------------------|
|                                       | 1999-2004<br>(n=910)   | 2005-2010<br>(n=837) | 2011-2014<br>(n=519) | P for trend | 1999-2004<br>(n=1,861) | 2005-2010<br>(n=1,771) | 2011-2014<br>(n=1,125) | P for trend | 1999-2004<br>(n=1,207) | 2005-2010<br>(n=1,364) | 2011-2014<br>(n=961) | P for trend | 1999-2004<br>(n=7,485) | 2005-2010<br>(n=6,348) | 2011-2014<br>(n=3,518) | P for trend | P for interaction |
| Total fruits, servings/d              | 1.03<br>(0.83-1.22)    | 1.06<br>(0.96-1.17)  | 1.21<br>(1.03-1.38)  | .19         | 1.01<br>(0.87-1.14)    | 1.10<br>(1.02-1.17)    | 1.05<br>(0.96-1.15)    | .59         | 1.13<br>(1.02-1.24)    | 1.15<br>(1.04-1.26)    | 1.09<br>(0.94-1.23)  | .60         | 1.04<br>(0.98-1.09)    | 1.12<br>(1.06-1.19)    | 1.16<br>(1.08-1.23)    | .008        | .29               |
| Intact/whole fruit                    | 0.46<br>(0.36-0.56)    | 0.52<br>(0.45-0.60)  | 0.75<br>(0.57-0.92)  | .005        | 0.47<br>(0.40-0.55)    | 0.59<br>(0.54-0.65)    | 0.63<br>(0.56-0.69)    | .003        | 0.41<br>(0.36-0.46)    | 0.62<br>(0.53-0.71)    | 0.63<br>(0.51-0.75)  | .002        | 0.48<br>(0.45-0.52)    | 0.68<br>(0.62-0.74)    | 0.74<br>(0.68-0.80)    | <.001       | .25               |
| 100% fruit juice                      | 0.67<br>(0.50-0.84)    | 0.58<br>(0.49-0.67)  | 0.58<br>(0.48-0.68)  | .37         | 0.61<br>(0.53-0.70)    | 0.61<br>(0.56-0.67)    | 0.54<br>(0.46-0.61)    | .20         | 0.79<br>(0.68-0.90)    | 0.64<br>(0.56-0.71)    | 0.56<br>(0.49-0.63)  | .001        | 0.61<br>(0.58-0.65)    | 0.54<br>(0.50-0.58)    | 0.50<br>(0.45-0.55)    | <.001       | .28               |
| Total vegetables, servings/d          | 1.06<br>(0.98-1.14)    | 1.09<br>(0.96-1.23)  | 1.03<br>(0.88-1.19)  | .81         | 1.13<br>(1.04-1.21)    | 0.96<br>(0.88-1.04)    | 0.96<br>(0.89-1.04)    | .005        | 1.02<br>(0.96-1.09)    | 0.93<br>(0.86-1.00)    | 0.93<br>(0.87-0.98)  | .04         | 1.01<br>(0.97-1.05)    | 0.98<br>(0.94-1.01)    | 0.96<br>(0.92-1.00)    | .08         | .31               |
| Dark-green vegetables                 | 0.04<br>(0.02-0.06)    | 0.06<br>(0.04-0.08)  | 0.06<br>(0.03-0.09)  | .32         | 0.04<br>(0.01-0.06)    | 0.04<br>(0.03-0.05)    | 0.05<br>(0.03-0.06)    | .54         | 0.02<br>(0.01-0.03)    | 0.04<br>(0.03-0.05)    | 0.05<br>(0.04-0.07)  | .002        | 0.04<br>(0.03-0.04)    | 0.05<br>(0.04-0.06)    | 0.07<br>(0.06-0.09)    | <.001       | .40               |
| Tomatoes                              | 0.25<br>(0.22-0.27)    | 0.25<br>(0.21-0.29)  | 0.24<br>(0.20-0.28)  | .87         | 0.29<br>(0.26-0.33)    | 0.23<br>(0.21-0.25)    | 0.23<br>(0.21-0.25)    | .001        | 0.27<br>(0.24-0.31)    | 0.23<br>(0.20-0.25)    | 0.22<br>(0.20-0.25)  | .03         | 0.27<br>(0.26-0.28)    | 0.23<br>(0.22-0.24)    | 0.22<br>(0.21-0.23)    | <.001       | .22               |
| Other red/orange vegetables           | 0.04<br>(0.02-0.06)    | 0.05<br>(0.04-0.07)  | 0.06<br>(0.04-0.08)  | .21         | 0.07<br>(0.04-0.09)    | 0.05<br>(0.03-0.06)    | 0.05<br>(0.03-0.07)    | .48         | 0.04<br>(0.03-0.06)    | 0.04<br>(0.03-0.05)    | 0.05<br>(0.04-0.07)  | .21         | 0.05<br>(0.04-0.06)    | 0.06<br>(0.05-0.06)    | 0.06<br>(0.05-0.07)    | .02         | .55               |
| White potatoes                        | 0.37<br>(0.31-0.43)    | 0.36<br>(0.29-0.42)  | 0.26<br>(0.21-0.31)  | .005        | 0.37<br>(0.31-0.43)    | 0.31<br>(0.28-0.34)    | 0.28<br>(0.25-0.32)    | .009        | 0.37<br>(0.31-0.43)    | 0.30<br>(0.27-0.33)    | 0.26<br>(0.22-0.29)  | .001        | 0.33<br>(0.31-0.35)    | 0.29<br>(0.27-0.31)    | 0.28<br>(0.25-0.30)    | <.001       | .32               |
| Other starchy (e.g., corn)            | 0.06<br>(0.04-0.08)    | 0.06<br>(0.04-0.07)  | 0.06<br>(0.03-0.08)  | .84         | 0.07<br>(0.06-0.09)    | 0.07<br>(0.06-0.08)    | 0.06<br>(0.04-0.07)    | .18         | 0.05<br>(0.04-0.07)    | 0.06<br>(0.05-0.07)    | 0.06<br>(0.04-0.08)  | .63         | 0.06<br>(0.05-0.07)    | 0.06<br>(0.06-0.07)    | 0.06<br>(0.05-0.07)    | .63         | .62               |
| Other vegetables                      | 0.28<br>(0.23-0.33)    | 0.30<br>(0.24-0.37)  | 0.32<br>(0.23-0.42)  | .40         | 0.27<br>(0.24-0.30)    | 0.24<br>(0.21-0.27)    | 0.26<br>(0.22-0.30)    | .61         | 0.25<br>(0.22-0.29)    | 0.25<br>(0.20-0.30)    | 0.26<br>(0.24-0.28)  | .78         | 0.27<br>(0.25-0.28)    | 0.26<br>(0.24-0.28)    | 0.25<br>(0.23-0.27)    | .27         | .60               |
| Vegetables excluding potatoes/starchy | 0.61<br>(0.53-0.69)    | 0.66<br>(0.58-0.74)  | 0.69<br>(0.55-0.82)  | .32         | 0.67<br>(0.60-0.74)    | 0.56<br>(0.50-0.62)    | 0.59<br>(0.53-0.64)    | .06         | 0.59<br>(0.54-0.64)    | 0.55<br>(0.49-0.61)    | 0.59<br>(0.55-0.63)  | .96         | 0.62<br>(0.59-0.64)    | 0.60<br>(0.57-0.63)    | 0.60<br>(0.57-0.63)    | .41         | .25               |
| Total grains, servings/d              |                        |                      |                      |             |                        |                        |                        |             |                        |                        |                      |             |                        |                        |                        |             |                   |
| Whole grains                          | 0.45<br>(0.33-0.57)    | 0.55<br>(0.44-0.66)  | 0.72<br>(0.59-0.85)  | .003        | 0.39<br>(0.32-0.45)    | 0.52<br>(0.46-0.57)    | 0.66<br>(0.59-0.73)    | <.001       | 0.36<br>(0.29-0.43)    | 0.48<br>(0.41-0.55)    | 0.88<br>(0.76-1.00)  | <.001       | 0.53<br>(0.49-0.56)    | 0.63<br>(0.58-0.67)    | 0.90<br>(0.83-0.96)    | <.001       | .02               |
| Refined grains                        | 6.19<br>(5.85-6.53)    | 5.95<br>(5.66-6.24)  | 6.15<br>(5.84-6.46)  | .82         | 6.16<br>(5.89-6.43)    | 6.28<br>(6.08-6.47)    | 6.34<br>(6.17-6.50)    | .26         | 6.23<br>(5.98-6.48)    | 6.17<br>(5.97-6.37)    | 6.09<br>(5.90-6.28)  | .38         | 6.27<br>(6.17-6.38)    | 6.14<br>(6.03-6.25)    | 6.17<br>(6.06-6.29)    | .15         | .35               |
| Nuts and seeds, servings/d            | 0.23<br>(0.17-0.28)    | 0.22<br>(0.18-0.27)  | 0.25<br>(0.17-0.32)  | .68         | 0.35<br>(0.17-0.52)    | 0.25<br>(0.21-0.30)    | 0.25<br>(0.19-0.31)    | .30         | 0.21<br>(0.15-0.28)    | 0.29<br>(0.24-0.35)    | 0.37<br>(0.23-0.52)  | .05         | 0.35<br>(0.31-0.39)    | 0.40<br>(0.36-0.44)    | 0.40<br>(0.36-0.45)    | .05         | .22               |
| Legumes, servings/d                   | 0.06<br>(0.05-0.07)    | 0.06<br>(0.04-0.08)  | 0.12<br>(0.07-0.17)  | .03         | 0.10<br>(0.08-0.13)    | 0.08<br>(0.07-0.10)    | 0.09<br>(0.07-0.11)    | .43         | 0.09<br>(0.06-0.11)    | 0.10<br>(0.07-0.13)    | 0.08<br>(0.07-0.10)  | .87         | 0.05<br>(0.04-0.06)    | 0.05<br>(0.05-0.06)    | 0.06<br>(0.05-0.07)    | .22         | .16               |
| Total meat, serving/d                 |                        |                      |                      |             |                        |                        |                        |             |                        |                        |                      |             |                        |                        |                        |             |                   |
| Processed meat                        | 0.22<br>(0.18-0.26)    | 0.30<br>(0.25-0.34)  | 0.26<br>(0.22-0.30)  | .15         | 0.24<br>(0.21-0.27)    | 0.23<br>(0.21-0.25)    | 0.23<br>(0.21-0.25)    | .62         | 0.25<br>(0.21-0.29)    | 0.26<br>(0.23-0.28)    | 0.25<br>(0.21-0.29)  | .91         | 0.24<br>(0.23-0.26)    | 0.25<br>(0.24-0.27)    | 0.27<br>(0.24-0.29)    | .12         | .38               |
| Unprocessed red meat                  | 0.36<br>(0.28-0.43)    | 0.37<br>(0.31-0.42)  | 0.35<br>(0.30-0.40)  | .89         | 0.34<br>(0.30-0.37)    | 0.36<br>(0.32-0.39)    | 0.34<br>(0.30-0.39)    | .78         | 0.42<br>(0.32-0.52)    | 0.34<br>(0.31-0.38)    | 0.31<br>(0.26-0.36)  | .05         | 0.35<br>(0.33-0.37)    | 0.32<br>(0.30-0.35)    | 0.30<br>(0.27-0.33)    | .008        | .19               |

|                                                     |                      |                       |                        |       |                      |                      |                       |       |                      |                      |                      |       |                      |                     |                     |       |     |
|-----------------------------------------------------|----------------------|-----------------------|------------------------|-------|----------------------|----------------------|-----------------------|-------|----------------------|----------------------|----------------------|-------|----------------------|---------------------|---------------------|-------|-----|
| Poultry                                             | 0.34<br>(0.28-0.41)  | 0.35<br>(0.30-0.40)   | 0.40<br>(0.32-0.47)    | .31   | 0.33<br>(0.29-0.38)  | 0.38<br>(0.35-0.41)  | 0.38<br>(0.32-0.43)   | .20   | 0.29<br>(0.24-0.34)  | 0.36<br>(0.31-0.40)  | 0.38<br>(0.31-0.45)  | .04   | 0.28<br>(0.26-0.31)  | 0.37<br>(0.35-0.40) | 0.37<br>(0.33-0.41) | <.001 | .60 |
| Fish and Shellfish                                  | 0.06<br>(0.04-0.09)  | 0.05<br>(0.03-0.07)   | 0.05<br>(0.03-0.06)    | .25   | 0.07<br>(0.04-0.09)  | 0.08<br>(0.06-0.10)  | 0.06<br>(0.04-0.08)   | .64   | 0.07<br>(0.02-0.12)  | 0.08<br>(0.05-0.11)  | 0.06<br>(0.04-0.09)  | .78   | 0.06<br>(0.05-0.07)  | 0.06<br>(0.05-0.07) | 0.09<br>(0.06-0.11) | .09   | .22 |
| High in omega-3 fatty acids <sup>b</sup>            | 0.01<br>(0.005-0.02) | 0.007<br>(0.002-0.01) | 0.005<br>(0.002-0.007) | .05   | 0.01<br>(0.005-0.02) | 0.01<br>(0.008-0.02) | 0.008<br>(0.004-0.01) | .67   | 0.02<br>(0.009-0.03) | 0.01<br>(0.005-0.02) | 0.01<br>(0.004-0.02) | .17   | 0.01<br>(0.009-0.02) | 0.01<br>(0.01-0.02) | 0.01<br>(0.01-0.02) | .50   | .27 |
| Low in omega-3 fatty acids <sup>b</sup>             | 0.05<br>(0.03-0.08)  | 0.05<br>(0.03-0.06)   | 0.04<br>(0.02-0.06)    | .38   | 0.06<br>(0.03-0.08)  | 0.07<br>(0.05-0.09)  | 0.05<br>(0.04-0.07)   | .72   | 0.05<br>(0.01-0.08)  | 0.07<br>(0.04-0.09)  | 0.05<br>(0.03-0.07)  | .86   | 0.05<br>(0.04-0.06)  | 0.05<br>(0.04-0.05) | 0.07<br>(0.05-0.09) | .08   | .27 |
| Eggs, servings/d                                    | 0.33<br>(0.26-0.39)  | 0.36<br>(0.29-0.42)   | 0.42<br>(0.30-0.53)    | .19   | 0.29<br>(0.24-0.34)  | 0.36<br>(0.32-0.40)  | 0.37<br>(0.32-0.42)   | .02   | 0.33<br>(0.23-0.43)  | 0.34<br>(0.30-0.37)  | 0.41<br>(0.34-0.48)  | .18   | 0.27<br>(0.25-0.29)  | 0.36<br>(0.34-0.39) | 0.34<br>(0.31-0.36) | <.001 | .99 |
| Total dairy, servings/d                             | 2.14<br>(1.94-2.33)  | 2.15<br>(2.02-2.29)   | 2.21<br>(2.04-2.39)    | .58   | 2.00<br>(1.89-2.11)  | 2.15<br>(2.05-2.25)  | 2.24<br>(2.13-2.36)   | .003  | 1.96<br>(1.78-2.14)  | 2.12<br>(2.00-2.24)  | 2.28<br>(2.13-2.44)  | .008  | 2.18<br>(2.10-2.26)  | 2.31(2.26-2.36)     | 2.36<br>(2.26-2.46) | .003  | .39 |
| Milk                                                | 1.51<br>(1.32-1.69)  | 1.33<br>(1.22-1.45)   | 1.28<br>(1.14-1.41)    | .05   | 1.37<br>(1.26-1.49)  | 1.37<br>(1.27-1.46)  | 1.31<br>(1.19-1.43)   | .45   | 1.35<br>(1.20-1.50)  | 1.34<br>(1.25-1.43)  | 1.28<br>(1.17-1.39)  | .43   | 1.47<br>(1.40-1.54)  | 1.46<br>(1.41-1.51) | 1.36<br>(1.28-1.44) | .04   | .52 |
| Cheese                                              | 0.55<br>(0.49-0.61)  | 0.72<br>(0.63-0.80)   | 0.81<br>(0.71-0.91)    | <.001 | 0.55<br>(0.49-0.61)  | 0.67<br>(0.63-0.71)  | 0.76<br>(0.69-0.83)   | <.001 | 0.55<br>(0.48-0.63)  | 0.66<br>(0.60-0.71)  | 0.84<br>(0.75-0.93)  | <.001 | 0.62<br>(0.59-0.65)  | 0.70<br>(0.68-0.73) | 0.83<br>(0.79-0.88) | <.001 | .55 |
| Yogurt                                              | 0.03<br>(0.01-0.04)  | 0.03<br>(0.02-0.04)   | 0.03<br>(0.02-0.04)    | .76   | 0.02<br>(0.01-0.03)  | 0.03<br>(0.02-0.04)  | 0.05<br>(0.04-0.06)   | .002  | 0.03<br>(0.007-0.05) | 0.03<br>(0.02-0.04)  | 0.07<br>(0.04-0.10)  | .01   | 0.04<br>(0.03-0.05)  | 0.05<br>(0.05-0.06) | 0.07<br>(0.06-0.08) | <.001 | .10 |
| Sugar-sweetened beverages <sup>c</sup> , servings/d | 2.16<br>(1.91-2.41)  | 1.85<br>(1.61-2.09)   | 1.44<br>(1.27-1.61)    | <.001 | 2.03<br>(1.80-2.26)  | 1.57<br>(1.40-1.74)  | 1.37<br>(1.22-1.52)   | <.001 | 1.90<br>(1.71-2.08)  | 1.64<br>(1.49-1.79)  | 1.34<br>(1.16-1.52)  | <.001 | 1.88<br>(1.78-1.97)  | 1.42<br>(1.34-1.51) | 1.20<br>(1.08-1.31) | <.001 | .80 |
| Added sugar, g/d                                    | 98.3<br>(90.3-106)   | 87.8<br>(81.9-93.7)   | 79.4<br>(74.8-84.0)    | <.001 | 100<br>(93.7-107)    | 84.4<br>(79.8-89.5)  | 81.1<br>(77.3-84.4)   | <.001 | 94.1<br>(87.8-100)   | 89.5<br>(84.8-94.5)  | 79.0<br>(74.3-83.2)  | <.001 | 98.3<br>(94.9-101)   | 83.2<br>(81.5-85.3) | 76.4<br>(73.9-79.0) | <.001 | .26 |
| Macronutrients                                      |                      |                       |                        |       |                      |                      |                       |       |                      |                      |                      |       |                      |                     |                     |       |     |
| Total fat, %Energy (E)                              | 31.9<br>(30.7-33.1)  | 33.4<br>(32.6-34.3)   | 32.5<br>(31.5-33.5)    | .39   | 32.8<br>(32.0-33.6)  | 32.7<br>(32.2-33.2)  | 32.7<br>(32.1-33.3)   | .84   | 32.8<br>(31.7-33.8)  | 32.6<br>(32.1-33.1)  | 33.2<br>(32.3-34.0)  | .51   | 32.3<br>(31.9-32.6)  | 32.9<br>(32.6-33.2) | 32.8<br>(32.5-33.1) | .02   | .66 |
| Saturated fat, %E                                   | 11.3<br>(10.8-11.9)  | 11.8<br>(11.5-12.1)   | 11.3<br>(10.7-11.9)    | .95   | 11.6<br>(11.2-11.9)  | 11.5<br>(11.3-11.7)  | 11.3<br>(11.0-11.5)   | .22   | 11.6<br>(11.2-12.0)  | 11.4<br>(11.2-11.7)  | 11.5<br>(11.1-11.9)  | .75   | 11.4<br>(11.3-11.6)  | 11.6<br>(11.5-11.7) | 11.4<br>(11.3-11.6) | .97   | .72 |
| Monounsaturated fat, %E                             | 14.8<br>(13.0-16.6)  | 14.5<br>(13.5-15.5)   | 14.2<br>(13.3-15.1)    | .55   | 15.1<br>(14.4-15.8)  | 14.4<br>(13.9-14.9)  | 14.1<br>(13.5-14.8)   | .04   | 14.1<br>(13.3-14.8)  | 13.9<br>(13.3-14.6)  | 14.1<br>(13.1-15.1)  | .93   | 14.0<br>(13.6-14.5)  | 14.3<br>(13.9-14.6) | 13.4<br>(13.1-13.7) | .07   | .60 |
| Polyunsaturated fat, %E                             | 5.98<br>(5.68-6.28)  | 6.74<br>(6.46-7.02)   | 7.14<br>(6.77-7.51)    | <.001 | 6.22<br>(5.98-6.46)  | 6.62<br>(6.44-6.80)  | 7.38<br>(7.19-7.56)   | <.001 | 6.32<br>(5.91-6.73)  | 6.59<br>(6.35-6.83)  | 7.50<br>(7.19-7.82)  | <.001 | 6.17<br>(6.07-6.28)  | 6.57<br>(6.47-6.68) | 7.34<br>(7.19-7.50) | <.001 | .99 |
| Seafood omega-3 fat, mg/d                           | 58.1<br>(45.2-71.1)  | 48.1<br>(35.1-61.1)   | 32.9<br>(26.4-39.5)    | .001  | 58.2<br>(41.4-74.9)  | 64.0<br>(51.1-76.9)  | 38.9<br>(25.9-51.9)   | .09   | 52.5<br>(39.6-65.3)  | 60.4<br>(45.3-75.5)  | 45.2<br>(31.6-58.8)  | .42   | 54.9<br>(48.1-61.7)  | 56.8<br>(46.4-67.1) | 47.5<br>(38.1-57.0) | .28   | .26 |
| Plant omge-3 fat, mg/d                              | 117<br>(111-122)     | 124<br>(117-131)      | 142<br>(137-148)       | <.001 | 120<br>(116-125)     | 123<br>(119-127)     | 146<br>(141-150)      | <.001 | 118<br>(111-126)     | 120<br>(113-126)     | 144<br>(137-152)     | <.001 | 117<br>(115-120)     | 120<br>(117-122)    | 143<br>(139-148)    | <.001 | .97 |
| Protein, %E                                         | 13.9<br>(13.4-14.5)  | 14.3<br>(13.9-14.7)   | 14.9<br>(14.5-15.4)    | .008  | 13.6<br>(13.2-14.1)  | 14.6<br>(14.2-14.9)  | 14.7<br>(14.4-15.1)   | <.001 | 13.9<br>(13.3-14.5)  | 14.2<br>(13.9-14.6)  | 14.8<br>(14.3-15.3)  | .02   | 13.8<br>(13.6-14.0)  | 14.6<br>(14.5-14.8) | 14.9<br>(14.7-15.1) | <.001 | .82 |
| Carbohydrate, %E                                    | 55.0<br>(53.8-56.2)  | 53.2<br>(52.2-54.2)   | 53.8<br>(52.6-55.0)    | .14   | 54.8<br>(53.9-55.6)  | 53.5<br>(52.8-54.3)  | 53.6<br>(53.0-54.3)   | .04   | 54.3<br>(53.3-55.3)  | 54.1<br>(53.3-54.8)  | 53.1<br>(51.9-54.2)  | .11   | 54.9<br>(54.4-55.3)  | 53.5<br>(53.2-53.9) | 53.4<br>(53.0-53.8) | <.001 | .86 |
| Other nutrients                                     |                      |                       |                        |       |                      |                      |                       |       |                      |                      |                      |       |                      |                     |                     |       |     |
| Sodium, mg/d                                        | 3051<br>(2934-3167)  | 3286<br>(3201-3371)   | 3399<br>(3264-3534)    | <.001 | 3184<br>(3080-3288)  | 3235<br>(3175-3296)  | 3264<br>(3206-3322)   | .19   | 3265<br>(3171-3359)  | 3185<br>(3133-3237)  | 3249<br>(3135-3363)  | .85   | 3162<br>(3131-3193)  | 3317<br>(3279-3354) | 3328<br>(3256-3400) | <.001 | .02 |

|                   |                     |                     |                     |       |                     |                     |                     |       |                     |                     |                     |       |                     |                     |                     |       |     |
|-------------------|---------------------|---------------------|---------------------|-------|---------------------|---------------------|---------------------|-------|---------------------|---------------------|---------------------|-------|---------------------|---------------------|---------------------|-------|-----|
| Cholesterol, mg/d | 236<br>(219-252)    | 244<br>(228-260)    | 253<br>(224-281)    | .30   | 229<br>(216-242)    | 243<br>(232-255)    | 243<br>(231-255)    | .11   | 238<br>(216-260)    | 227<br>(217-236)    | 250<br>(228-272)    | .43   | 221<br>(216-225)    | 234<br>(228-240)    | 232<br>(225-238)    | .002  | .99 |
| Fiber, g/d        | 12.4<br>(11.7-13.1) | 13.4<br>(12.9-14.0) | 15.9<br>(15.0-16.8) | <.001 | 13.1<br>(12.4-13.8) | 13.7<br>(13.3-14.1) | 15.0<br>(14.5-15.5) | <.001 | 12.0<br>(11.6-12.5) | 13.9<br>(13.4-14.3) | 15.1<br>(14.6-15.6) | <.001 | 12.3<br>(12.1-12.6) | 13.8<br>(13.5-14.1) | 15.2<br>(14.8-15.5) | <.001 | .09 |
| Potassium, mg/d   | 2270<br>(2170-2371) | 2274<br>(2201-2347) | 2387<br>(2305-2469) | .10   | 2294<br>(2211-2377) | 2285<br>(2223-2347) | 2334<br>(2288-2380) | .42   | 2262<br>(2186-2338) | 2256<br>(2199-2314) | 2331<br>(2256-2406) | .19   | 2249<br>(2208-2290) | 2304<br>(2274-2334) | 2365<br>(2334-2396) | <.001 | .43 |
| Calcium, mg/d     | 945<br>(880-1010)   | 1025<br>(978-1071)  | 1073<br>(1018-1129) | .003  | 888<br>(859-917)    | 1016<br>(987-1044)  | 1066<br>(1034-1098) | <.001 | 880<br>(825-935)    | 1008<br>(973-1044)  | 1096<br>(1046-1146) | <.001 | 962<br>(936-987)    | 1073<br>(1056-1090) | 1118<br>(1089-1147) | <.001 | .33 |

Abbreviation: NHANES, National Health and Nutrition Examination Survey.

<sup>a</sup> Data were weighted to be nationally representative. All analyses (except for macronutrients) were energy-adjusted to 2000 kcal/d using the residual method. Macronutrients were reported as % of total energy.

<sup>b</sup> Cooked fish and shellfish containing 500 mg or more of omega-3 fatty acids (EPA and DHA) per 3 ounces were included in the high omega-3 fatty acids category.

<sup>c</sup> Serving of sugar-sweetened beverage defined as 8 fl oz or 237 grams. Sugar-sweetened beverages include soft drinks, fruit drinks, sports drinks, presweetened teas and energy drinks with more than 50 kcal per 8 fl oz.

*P* for trend was estimated by treating survey-cycle as a continuous variable in a survey-weighted linear regression model. *P* for interaction was calculated using the Wald F test for an interaction term between survey-cycle and the categorical variable (household food security status).

**eTable 19. Trends in Estimated Mean Consumption of Food Groups and Nutrients of Interest by Participation of Supplemental Nutrition Assistance Program (SNAP) Among US Children by NHANES Survey Cycles, 1999-2004, 2005-2010 and 2011-2014<sup>a</sup>**

| Foods/nutrients                                     | SNAP Participants   |                     |                     | P for trend | SNAP Non-Participants |                     |                     | P for trend | P for interaction |
|-----------------------------------------------------|---------------------|---------------------|---------------------|-------------|-----------------------|---------------------|---------------------|-------------|-------------------|
|                                                     | 1999-2004 (n=2,549) | 2005-2010 (n=2,964) | 2011-2014 (n=2,305) |             | 1999-2004 (n=9,397)   | 2005-2010 (n=7,454) | 2011-2014 (n=3,850) |             |                   |
| Total fruits, servings/d                            | 1.08 (0.97-1.19)    | 1.13 (1.06-1.20)    | 1.02 (0.94-1.10)    | .35         | 1.04 (0.98-1.09)      | 1.12 (1.06-1.18)    | 1.12 (1.07-1.18)    | .02         | .02               |
| Intact/whole fruit                                  | 0.42 (0.36-0.49)    | 0.60 (0.55-0.65)    | 0.58 (0.52-0.63)    | .001        | 0.48 (0.45-0.51)      | 0.67 (0.62-0.72)    | 0.73 (0.68-0.78)    | <.001       | .03               |
| 100% fruit juice                                    | 0.75 (0.67-0.84)    | 0.66 (0.61-0.72)    | 0.57 (0.50-0.64)    | .001        | 0.62 (0.58-0.65)      | 0.54 (0.50-0.58)    | 0.48 (0.44-0.52)    | <.001       | .42               |
| Total vegetables, servings/d                        | 1.05 (1.00-1.10)    | 0.96 (0.90-1.01)    | 0.95 (0.90-1.01)    | .02         | 1.03 (1.00-1.06)      | 0.99 (0.96-1.02)    | 0.97 (0.95-1.00)    | .01         | .44               |
| Dark-green vegetables                               | 0.04 (0.02-0.06)    | 0.04 (0.03-0.05)    | 0.06 (0.04-0.07)    | .25         | 0.04 (0.03-0.04)      | 0.05 (0.04-0.06)    | 0.06 (0.05-0.07)    | <.001       | .26               |
| Tomatoes                                            | 0.24 (0.22-0.27)    | 0.23 (0.22-0.24)    | 0.23 (0.21-0.24)    | .33         | 0.28 (0.26-0.29)      | 0.23 (0.22-0.25)    | 0.22 (0.21-0.22)    | <.001       | .001              |
| Other red/orange vegetables                         | 0.05 (0.03-0.06)    | 0.04 (0.03-0.05)    | 0.05 (0.04-0.06)    | .76         | 0.05 (0.04-0.06)      | 0.06 (0.05-0.06)    | 0.06 (0.06-0.07)    | .002        | .32               |
| White potatoes                                      | 0.36 (0.33-0.40)    | 0.33 (0.31-0.35)    | 0.28 (0.26-0.31)    | <.001       | 0.34 (0.32-0.35)      | 0.29 (0.28-0.31)    | 0.29 (0.27-0.31)    | <.001       | .14               |
| Other starchy (e.g., corn)                          | 0.08 (0.06-0.09)    | 0.06 (0.05-0.07)    | 0.07 (0.06-0.08)    | .32         | 0.06 (0.05-0.07)      | 0.06 (0.06-0.07)    | 0.05 (0.05-0.06)    | .39         | .62               |
| Other vegetables                                    | 0.25 (0.23-0.27)    | 0.23 (0.21-0.25)    | 0.23 (0.21-0.26)    | .29         | 0.27 (0.25-0.29)      | 0.27 (0.25-0.29)    | 0.26 (0.24-0.27)    | .19         | .89               |
| Vegetables excluding potatoes/starchy               | 0.59 (0.54-0.63)    | 0.54 (0.51-0.58)    | 0.57 (0.52-0.62)    | .67         | 0.63 (0.61-0.65)      | 0.61 (0.58-0.64)    | 0.60 (0.58-0.62)    | .06         | .64               |
| Total grains, servings/d                            |                     |                     |                     |             |                       |                     |                     |             |                   |
| Whole grains                                        | 0.40 (0.35-0.46)    | 0.52 (0.47-0.57)    | 0.77 (0.70-0.84)    | <.001       | 0.51 (0.48-0.54)      | 0.62 (0.58-0.66)    | 0.91 (0.86-0.96)    | <.001       | .67               |
| Refined grains                                      | 6.15 (5.96-6.34)    | 6.05 (5.92-6.18)    | 6.21 (6.09-6.33)    | .52         | 6.27 (6.16-6.38)      | 6.17 (6.08-6.27)    | 6.22 (6.14-6.31)    | .49         | .31               |
| Nuts and seeds, servings/d                          | 0.25 (0.20-0.30)    | 0.25 (0.22-0.28)    | 0.24 (0.19-0.28)    | .78         | 0.35 (0.31-0.39)      | 0.39 (0.35-0.43)    | 0.41 (0.37-0.45)    | .03         | .11               |
| Legumes, servings/d                                 | 0.07 (0.05-0.09)    | 0.06 (0.05-0.08)    | 0.09 (0.08-0.11)    | .04         | 0.06 (0.05-0.07)      | 0.06 (0.05-0.07)    | 0.07 (0.06-0.08)    | .18         | .18               |
| Total meat, serving/d                               |                     |                     |                     |             |                       |                     |                     |             |                   |
| Processed meat                                      | 0.27 (0.24-0.29)    | 0.27 (0.24-0.29)    | 0.25 (0.23-0.27)    | .25         | 0.24 (0.22-0.26)      | 0.25 (0.23-0.26)    | 0.26 (0.25-0.28)    | .06         | .04               |
| Unprocessed red meat                                | 0.34 (0.30-0.38)    | 0.34 (0.31-0.36)    | 0.32 (0.29-0.34)    | .30         | 0.35 (0.33-0.38)      | 0.33 (0.31-0.35)    | 0.31 (0.29-0.33)    | .01         | .56               |
| Poultry                                             | 0.32 (0.28-0.36)    | 0.37 (0.35-0.40)    | 0.37 (0.34-0.41)    | .05         | 0.29 (0.27-0.31)      | 0.37 (0.35-0.39)    | 0.37 (0.34-0.39)    | <.001       | .51               |
| Fish and Shellfish                                  | 0.06 (0.05-0.08)    | 0.06 (0.05-0.07)    | 0.09 (0.05-0.12)    | .26         | 0.06 (0.05-0.07)      | 0.07 (0.06-0.08)    | 0.07 (0.06-0.08)    | .58         | .37               |
| High in omega-3 fatty acids <sup>b</sup>            | 0.01 (0.007-0.02)   | 0.008 (0.005-0.01)  | 0.01 (0.006-0.01)   | .55         | 0.01 (0.01-0.02)      | 0.02 (0.01-0.02)    | 0.01 (0.01-0.02)    | .38         | .30               |
| Low in omega-3 fatty acids <sup>b</sup>             | 0.05 (0.04-0.07)    | 0.05 (0.04-0.06)    | 0.08 (0.04-0.11)    | .20         | 0.05 (0.04-0.06)      | 0.05 (0.04-0.06)    | 0.05 (0.04-0.06)    | .71         | .26               |
| Eggs, servings/d                                    | 0.30 (0.26-0.35)    | 0.36 (0.32-0.40)    | 0.36 (0.32-0.39)    | .09         | 0.28 (0.26-0.29)      | 0.36 (0.34-0.38)    | 0.37 (0.35-0.39)    | <.001       | .14               |
| Total dairy, servings/d                             | 2.10 (1.98-2.22)    | 2.19 (2.10-2.28)    | 2.24 (2.15-2.34)    | .06         | 2.14 (2.07-2.22)      | 2.28 (2.23-2.32)    | 2.26 (2.18-2.34)    | .03         | .78               |
| Milk                                                | 1.47 (1.36-1.57)    | 1.40 (1.32-1.48)    | 1.30 (1.22-1.38)    | .01         | 1.44 (1.38-1.51)      | 1.44 (1.40-1.49)    | 1.28 (1.22-1.34)    | <.001       | .99               |
| Cheese                                              | 0.55 (0.50-0.61)    | 0.67 (0.64-0.70)    | 0.80 (0.75-0.84)    | <.001       | 0.61 (0.58-0.64)      | 0.70 (0.67-0.73)    | 0.81 (0.78-0.84)    | <.001       | .22               |
| Yogurt                                              | 0.02 (0.01-0.02)    | 0.03 (0.02-0.04)    | 0.04 (0.03-0.05)    | <.001       | 0.04 (0.04-0.05)      | 0.05 (0.05-0.06)    | 0.07 (0.06-0.08)    | <.001       | .71               |
| Sugar-sweetened beverages <sup>c</sup> , servings/d | 1.79 (1.66-1.92)    | 1.63 (1.51-1.75)    | 1.37 (1.22-1.53)    | <.001       | 1.93 (1.83-2.02)      | 1.44 (1.37-1.52)    | 1.13 (1.05-1.20)    | <.001       | .001              |
| Added sugar, g/d                                    | 96.2 (91.1-101)     | 87.4 (84.8-89.9)    | 81.1 (76.9-84.8)    | <.001       | 98.3 (95.3-101)       | 83.6 (81.5-85.3)    | 74.3 (72.7-76.0)    | <.001       | .01               |
| Macronutrients                                      |                     |                     |                     |             |                       |                     |                     |             |                   |
| Total fat, %Energy (E)                              | 32.9 (32.2-33.6)    | 32.9 (32.5-33.3)    | 32.9 (32.5-33.3)    | .98         | 32.3 (31.9-32.6)      | 32.9 (32.6-33.1)    | 33.5 (33.2-33.8)    | <.001       | .01               |
| Saturated fat, %E                                   | 11.7 (11.4-12.0)    | 11.6 (11.4-11.7)    | 11.3 (11.1-11.5)    | .05         | 11.4 (11.2-11.6)      | 11.6 (11.5-11.7)    | 11.7 (11.6-11.9)    | .009        | .003              |

|                           |                     |                     |                     |       |                     |                     |                     |       |      |
|---------------------------|---------------------|---------------------|---------------------|-------|---------------------|---------------------|---------------------|-------|------|
| Monounsaturated fat, %E   | 15.3<br>(14.7-15.9) | 14.7<br>(14.2-15.3) | 14.3<br>(13.9-14.7) | .006  | 14.0<br>(13.6-14.3) | 14.1<br>(13.8-14.4) | 14.1<br>(13.8-14.4) | .60   | .004 |
| Polyunsaturated fat, %E   | 6.18<br>(5.99-6.37) | 6.58<br>(6.45-6.71) | 7.46<br>(7.28-7.64) | <.001 | 6.18<br>(6.09-6.27) | 6.60<br>(6.50-6.70) | 7.42<br>(7.32-7.52) | <.001 | .70  |
| Seafood omega-3 fat, mg/d | 58.3<br>(47.9-68.8) | 49.8<br>(41.9-57.7) | 51.6<br>(33.7-69.6) | .56   | 54.1<br>(48.4-59.9) | 59.7<br>(49.8-69.6) | 42.3<br>(38.0-46.6) | .002  | .62  |
| Plant omega-3 fat, mg/d   | 122<br>(118-126)    | 120<br>(117-123)    | 146<br>(141-152)    | <.001 | 117<br>(114-119)    | 121<br>(118-123)    | 144<br>(142-146)    | <.001 | .71  |
| Protein, %E               | 13.8<br>(13.5-14.2) | 14.3<br>(14.1-14.5) | 14.6<br>(14.4-14.9) | <.001 | 13.8<br>(13.6-14.0) | 14.6<br>(14.5-14.8) | 14.9<br>(14.7-15.1) | <.001 | .19  |
| Carbohydrate, %E          | 54.3<br>(53.5-55.2) | 53.8<br>(53.3-54.3) | 53.6<br>(53.1-54.0) | .11   | 54.9<br>(54.5-55.3) | 53.5<br>(53.2-53.8) | 52.7<br>(52.3-53.1) | <.001 | .01  |
| Other nutrients           |                     |                     |                     |       |                     |                     |                     |       |      |
| Sodium, mg/d              | 3235<br>(3155-3315) | 3283<br>(3237-3329) | 3333<br>(3278-3389) | .04   | 3154<br>(3123-3184) | 3293<br>(3258-3328) | 3313<br>(3267-3360) | <.001 | .24  |
| Cholesterol, mg/d         | 238<br>(228-249)    | 241<br>(231-251)    | 240<br>(231-249)    | .80   | 220<br>(216-225)    | 234<br>(229-240)    | 244<br>(237-250)    | <.001 | .01  |
| Fiber, g/d                | 12.2<br>(11.7-12.7) | 13.3<br>(12.9-13.7) | 14.9<br>(14.5-15.4) | <.001 | 12.5<br>(12.2-12.7) | 13.9<br>(13.6-14.2) | 15.4<br>(15.1-15.6) | <.001 | .70  |
| Potassium, mg/d           | 2266<br>(2207-2325) | 2266<br>(2221-2310) | 2313<br>(2274-2352) | .17   | 2257<br>(2216-2297) | 2306<br>(2280-2332) | 2340<br>(2314-2365) | .001  | .38  |
| Calcium, mg/d             | 916<br>(881-951)    | 1022<br>(996-1048)  | 1070<br>(1042-1098) | <.001 | 950<br>(926-974)    | 1065<br>(1049-1081) | 1093<br>(1068-1118) | <.001 | .77  |

Abbreviation: NHANES, National Health and Nutrition Examination Survey.

<sup>a</sup> Data were weighted to be nationally representative. All analyses (except for macronutrients) were energy-adjusted to 2000 kcal/d using the residual method. Macronutrients were reported as % of total energy.

<sup>b</sup> Cooked fish and shellfish containing 500 mg or more of omega-3 fatty acids (EPA and DHA) per 3 ounces were included in the high omega-3 fatty acids category.

<sup>c</sup> Serving of sugar-sweetened beverage defined as 8 fl oz or 237 grams. Sugar-sweetened beverages include soft drinks, fruit drinks, sports drinks, presweetened teas and energy drinks with more than 50 kcal per 8 fl oz.

*P* for trend was estimated by treating survey-cycle as a continuous variable in a survey-weighted linear regression model. *P* for interaction was calculated using the Wald *F* test for an interaction term between survey-cycle and the indicator variable (participation of SNAP).



**eTable 20. Trends in Estimated Mean Consumption of Food Groups and Nutrients of Interest by Participation of Women, Infants, & Children (WIC) Nutrition Program Among US Children by NHANES Survey Cycles, 1999-2004, 2005-2010 and 2011-2014<sup>a</sup>**

| Foods/nutrients                                     | WIC Participants     |                       |                      | P for trend | WIC Non-Participants |                     |                     | P for trend | P for interaction |
|-----------------------------------------------------|----------------------|-----------------------|----------------------|-------------|----------------------|---------------------|---------------------|-------------|-------------------|
|                                                     | 1999-2004 (n=2,421)  | 2005-2010 (n=2,297)   | 2011-2014 (n=1,341)  |             | 1999-2004 (n=9,525)  | 2005-2010 (n=8,121) | 2011-2014 (n=4,814) |             |                   |
| Total fruits, servings/d                            | 1.30<br>(1.18-1.43)  | 1.35<br>(1.28-1.43)   | 1.25<br>(1.14-1.36)  | .56         | 1.00<br>(0.94-1.05)  | 1.08<br>(1.03-1.14) | 1.09<br>(1.03-1.14) | .02         | .10               |
| Intact/whole fruit                                  | 0.53<br>(0.46-0.61)  | 0.67<br>(0.62-0.72)   | 0.69<br>(0.63-0.74)  | <.001       | 0.46<br>(0.42-0.50)  | 0.65<br>(0.60-0.70) | 0.70<br>(0.65-0.75) | <.001       | .22               |
| 100% fruit juice                                    | 0.94<br>(0.84-1.03)  | 0.87<br>(0.81-0.93)   | 0.72<br>(0.62-0.82)  | .003        | 0.59<br>(0.56-0.63)  | 0.51<br>(0.48-0.55) | 0.47<br>(0.43-0.51) | <.001       | .21               |
| Total vegetables, servings/d                        | 1.02<br>(0.95-1.08)  | 0.93<br>(0.89-0.97)   | 0.91<br>(0.85-0.98)  | .02         | 1.04<br>(1.00-1.07)  | 0.99<br>(0.96-1.02) | 0.98<br>(0.95-1.00) | .008        | .33               |
| Dark-green vegetables                               | 0.02<br>(0.01-0.03)  | 0.03<br>(0.02-0.04)   | 0.05<br>(0.03-0.07)  | .04         | 0.04<br>(0.03-0.04)  | 0.05<br>(0.04-0.06) | 0.06<br>(0.05-0.07) | <.001       | .77               |
| Tomatoes                                            | 0.26<br>(0.24-0.29)  | 0.23<br>(0.22-0.25)   | 0.24<br>(0.22-0.25)  | .10         | 0.27<br>(0.26-0.28)  | 0.23<br>(0.22-0.24) | 0.22<br>(0.21-0.22) | <.001       | .14               |
| Other red/orange vegetables                         | 0.04<br>(0.03-0.05)  | 0.05<br>(0.04-0.05)   | 0.05<br>(0.04-0.06)  | .18         | 0.05<br>(0.04-0.06)  | 0.05<br>(0.05-0.06) | 0.06<br>(0.06-0.07) | .01         | .73               |
| White potatoes                                      | 0.37<br>(0.33-0.41)  | 0.31<br>(0.28-0.33)   | 0.25<br>(0.22-0.28)  | <.001       | 0.34<br>(0.32-0.36)  | 0.30<br>(0.28-0.32) | 0.29<br>(0.28-0.31) | .001        | .01               |
| Other starchy (e.g., corn)                          | 0.07<br>(0.06-0.08)  | 0.07<br>(0.06-0.08)   | 0.06<br>(0.05-0.07)  | .09         | 0.06<br>(0.05-0.07)  | 0.06<br>(0.06-0.07) | 0.06<br>(0.05-0.06) | .54         | .23               |
| Other vegetables                                    | 0.24<br>(0.21-0.26)  | 0.23<br>(0.21-0.24)   | 0.24<br>(0.21-0.27)  | .87         | 0.27<br>(0.26-0.29)  | 0.27<br>(0.25-0.29) | 0.25<br>(0.24-0.27) | .05         | .22               |
| Vegetables excluding potatoes/starchy               | 0.56<br>(0.51-0.61)  | 0.53<br>(0.50-0.56)   | 0.57<br>(0.53-0.62)  | .83         | 0.63<br>(0.61-0.66)  | 0.61<br>(0.58-0.63) | 0.60<br>(0.58-0.62) | .02         | .23               |
| Total grains, servings/d                            |                      |                       |                      |             |                      |                     |                     |             |                   |
| Whole grains                                        | 0.42<br>(0.35-0.49)  | 0.52<br>(0.47-0.56)   | 0.84<br>(0.76-0.93)  | <.001       | 0.51<br>(0.48-0.54)  | 0.61<br>(0.57-0.65) | 0.89<br>(0.84-0.93) | <.001       | .60               |
| Refined grains                                      | 6.18<br>(5.93-6.42)  | 5.97<br>(5.83-6.11)   | 6.11<br>(5.90-6.31)  | .58         | 6.26<br>(6.16-6.37)  | 6.18<br>(6.09-6.27) | 6.24<br>(6.16-6.31) | .69         | .71               |
| Nuts and seeds, servings/d                          | 0.22<br>(0.17-0.27)  | 0.22<br>(0.19-0.25)   | 0.24<br>(0.18-0.29)  | .67         | 0.35<br>(0.31-0.39)  | 0.39<br>(0.35-0.42) | 0.39<br>(0.36-0.43) | .14         | .59               |
| Legumes, servings/d                                 | 0.09<br>(0.07-0.11)  | 0.09<br>(0.08-0.11)   | 0.12<br>(0.09-0.15)  | .11         | 0.06<br>(0.05-0.07)  | 0.06<br>(0.05-0.06) | 0.07<br>(0.06-0.07) | .06         | .34               |
| Total meat, serving/d                               |                      |                       |                      |             |                      |                     |                     |             |                   |
| Processed meat                                      | 0.23<br>(0.20-0.26)  | 0.23<br>(0.21-0.25)   | 0.23<br>(0.20-0.26)  | .93         | 0.25<br>(0.23-0.26)  | 0.25<br>(0.24-0.27) | 0.26<br>(0.25-0.28) | .12         | .48               |
| Unprocessed red meat                                | 0.38<br>(0.31-0.44)  | 0.30<br>(0.28-0.33)   | 0.31<br>(0.26-0.35)  | .07         | 0.35<br>(0.32-0.37)  | 0.34<br>(0.32-0.36) | 0.31<br>(0.29-0.33) | .03         | .34               |
| Poultry                                             | 0.29<br>(0.25-0.33)  | 0.38<br>(0.36-0.41)   | 0.39<br>(0.34-0.43)  | .002        | 0.30<br>(0.28-0.32)  | 0.37<br>(0.35-0.39) | 0.37<br>(0.34-0.39) | <.001       | .31               |
| Fish and Shellfish                                  | 0.07<br>(0.04-0.09)  | 0.06<br>(0.04-0.07)   | 0.06<br>(0.04-0.08)  | .76         | 0.06<br>(0.05-0.07)  | 0.07<br>(0.06-0.08) | 0.07<br>(0.06-0.09) | .27         | .46               |
| High in omega-3 fatty acids <sup>b</sup>            | 0.01<br>(0.004-0.02) | 0.009<br>(0.006-0.01) | 0.01<br>(0.008-0.02) | .88         | 0.01<br>(0.01-0.02)  | 0.01<br>(0.01-0.02) | 0.01<br>(0.01-0.02) | .64         | .97               |
| Low in omega-3 fatty acids <sup>b</sup>             | 0.05<br>(0.03-0.07)  | 0.05<br>(0.04-0.06)   | 0.05<br>(0.03-0.06)  | .66         | 0.05<br>(0.04-0.06)  | 0.05<br>(0.04-0.06) | 0.06<br>(0.05-0.07) | .26         | .36               |
| Eggs, servings/d                                    | 0.38<br>(0.31-0.44)  | 0.40<br>(0.36-0.44)   | 0.38<br>(0.33-0.44)  | .87         | 0.26<br>(0.25-0.28)  | 0.36<br>(0.33-0.38) | 0.37<br>(0.35-0.39) | <.001       | .03               |
| Total dairy, servings/d                             | 2.14<br>(2.00-2.28)  | 2.41<br>(2.30-2.52)   | 2.38<br>(2.27-2.49)  | .007        | 2.13<br>(2.06-2.20)  | 2.23<br>(2.18-2.28) | 2.24<br>(2.16-2.32) | .04         | .12               |
| Milk                                                | 1.50<br>(1.38-1.62)  | 1.60<br>(1.50-1.69)   | 1.44<br>(1.32-1.55)  | .56         | 1.44<br>(1.38-1.50)  | 1.40<br>(1.36-1.45) | 1.26<br>(1.21-1.32) | <.001       | .12               |
| Cheese                                              | 0.53<br>(0.48-0.57)  | 0.62<br>(0.59-0.66)   | 0.75<br>(0.67-0.83)  | <.001       | 0.62<br>(0.59-0.65)  | 0.71<br>(0.68-0.73) | 0.82<br>(0.78-0.85) | <.001       | .58               |
| Yogurt                                              | 0.03<br>(0.02-0.03)  | 0.05<br>(0.04-0.05)   | 0.06<br>(0.04-0.07)  | <.001       | 0.04<br>(0.03-0.05)  | 0.05<br>(0.04-0.05) | 0.07<br>(0.06-0.07) | <.001       | .48               |
| Sugar-sweetened beverages <sup>c</sup> , servings/d | 1.67<br>(1.53-1.81)  | 1.35<br>(1.24-1.46)   | 1.18<br>(1.00-1.35)  | <.001       | 1.94<br>(1.85-2.04)  | 1.50<br>(1.42-1.59) | 1.17<br>(1.11-1.24) | <.001       | .02               |
| Added sugar, g/d                                    | 90.3<br>(86.1-94.1)  | 80.2<br>(77.7-83.2)   | 71.8<br>(66.4-77.3)  | <.001       | 99.1<br>(96.2-102)   | 84.8<br>(82.7-86.9) | 76.0<br>(74.8-77.3) | <.001       | .16               |
| Macronutrients                                      |                      |                       |                      |             |                      |                     |                     |             |                   |
| Total fat, %Energy (E)                              | 32.3<br>(31.8-32.9)  | 32.2<br>(31.8-32.6)   | 32.3<br>(31.5-33.1)  | .89         | 32.4<br>(32.0-32.7)  | 33.0<br>(32.8-33.2) | 33.5<br>(33.2-33.8) | <.001       | .03               |
| Saturated fat, %E                                   | 11.6<br>(11.3-11.9)  | 11.4<br>(11.3-11.6)   | 11.3<br>(10.9-11.7)  | .22         | 11.4<br>(11.3-11.6)  | 11.6<br>(11.5-11.7) | 11.7<br>(11.5-11.8) | .02         | .03               |
| Monounsaturated fat, %E                             | 15.4<br>(14.7-16.0)  | 14.8<br>(14.4-15.1)   | 14.3<br>(13.6-14.9)  | .02         | 14.0<br>(13.7-14.4)  | 14.2<br>(13.9-14.4) | 14.1<br>(13.8-14.4) | .58         | .01               |

|                           |                     |                     |                     |       |                     |                     |                     |       |      |
|---------------------------|---------------------|---------------------|---------------------|-------|---------------------|---------------------|---------------------|-------|------|
| Polyunsaturated fat, %E   | 6.03<br>(5.87-6.20) | 6.38<br>(6.27-6.50) | 7.09<br>(6.87-7.31) | <.001 | 6.21<br>(6.11-6.31) | 6.63<br>(6.54-6.73) | 7.47<br>(7.38-7.56) | <.001 | .16  |
| Seafood omega-3 fat, mg/d | 49.0<br>(38.1-60.0) | 56.8<br>(46.9-66.6) | 36.8<br>(31.1-42.4) | .10   | 55.8<br>(49.9-61.7) | 57.8<br>(48.4-67.2) | 45.0<br>(39.4-50.7) | .009  | .99  |
| Plant omega-3 fat, mg/d   | 119<br>(116-122)    | 119<br>(116-121)    | 141<br>(136-147)    | <.001 | 117<br>(115-120)    | 121<br>(118-123)    | 145<br>(143-147)    | <.001 | .09  |
| Protein, %E               | 14.1<br>(13.7-14.4) | 14.6<br>(14.3-14.8) | 14.9<br>(14.6-15.3) | .001  | 13.8<br>(13.6-13.9) | 14.6<br>(14.4-14.7) | 14.8<br>(14.7-15.0) | <.001 | .49  |
| Carbohydrate, %E          | 54.8<br>(54.1-55.4) | 54.3<br>(53.8-54.8) | 53.9<br>(52.9-54.9) | .14   | 54.8<br>(54.4-55.2) | 53.5<br>(53.1-53.8) | 52.8<br>(52.4-53.1) | <.001 | .07  |
| Other nutrients           |                     |                     |                     |       |                     |                     |                     |       |      |
| Sodium, mg/d              | 3177<br>(3114-3239) | 3194<br>(3135-3254) | 3408<br>(3139-3677) | .10   | 3166<br>(3132-3199) | 3307<br>(3273-3341) | 3306<br>(3276-3337) | <.001 | .54  |
| Cholesterol, mg/d         | 256<br>(242-270)    | 251<br>(241-262)    | 248<br>(233-263)    | .45   | 218<br>(213-222)    | 233<br>(228-238)    | 243<br>(237-248)    | <.001 | .004 |
| Fiber, g/d                | 12.6<br>(12.1-13.2) | 14.0<br>(13.6-14.3) | 15.6<br>(15.0-16.3) | <.001 | 12.4<br>(12.1-12.6) | 13.8<br>(13.5-14.0) | 15.3<br>(15.0-15.5) | <.001 | .87  |
| Potassium, mg/d           | 2377<br>(2288-2467) | 2422<br>(2381-2464) | 2449<br>(2392-2506) | .19   | 2237<br>(2199-2276) | 2277<br>(2249-2304) | 2320<br>(2295-2345) | <.001 | .85  |
| Calcium, mg/d             | 932<br>(894-970)    | 1087<br>(1060-1114) | 1114<br>(1079-1148) | <.001 | 947<br>(924-969)    | 1051<br>(1034-1068) | 1086<br>(1062-1110) | <.001 | .07  |

Abbreviation: NHANES, National Health and Nutrition Examination Survey.

<sup>a</sup> Data were weighted to be nationally representative. All analyses (except for macronutrients) were energy-adjusted to 2000 kcal/d using the residual method. Macronutrients were reported as % of total energy.

<sup>b</sup> Cooked fish and shellfish containing 500 mg or more of omega-3 fatty acids (EPA and DHA) per 3 ounces were included in the high omega-3 fatty acids category.

<sup>c</sup> Serving of sugar-sweetened beverage defined as 8 fl oz or 237 grams. Sugar-sweetened beverages include soft drinks, fruit drinks, sports drinks, presweetened teas and energy drinks with more than 50 kcal per 8 fl oz.

<sup>d</sup> *P* for trend was estimated by treating survey-cycle as a continuous variable in a survey-weighted linear regression model. *P* for interaction was calculated using the Wald F test for an interaction term between survey-cycle and the indicator variable (participation of WIC).

**eTable 21. Trends in Estimated Mean Consumption of Food Groups and Nutrients of Interest by Participation of National School Lunch Program (NSLP)/ School Breakfast Program (SBP) Among US Children by NHANES Survey Cycles, 1999-2004, 2005-2010 and 2011-2016<sup>a</sup>**

| Foods/nutrients                                     | NSLP/SBP Participants |                      |                      |       | P for trend         | NSLP/ SBP Non-Participants |                     |                     |      | P for trend | P for interaction |
|-----------------------------------------------------|-----------------------|----------------------|----------------------|-------|---------------------|----------------------------|---------------------|---------------------|------|-------------|-------------------|
|                                                     | 1999-2004 (n=4,569)   | 2005-2010 (n=4,185)  | 2011-2016 (n=4,115)  |       |                     | 1999-2004 (n=7,377)        | 2005-2010 (n=6,233) | 2011-2016 (n=4,941) |      |             |                   |
| Total fruits, servings/d                            | 0.99<br>(0.92-1.07)   | 1.05<br>(1.00-1.11)  | 0.98<br>(0.92-1.04)  | .66   | 1.06<br>(1.00-1.12) | 1.15<br>(1.09-1.21)        | 1.18<br>(1.12-1.23) | .008                | .01  |             |                   |
| Intact/whole fruit                                  | 0.44<br>(0.40-0.48)   | 0.58<br>(0.54-0.61)  | 0.59<br>(0.55-0.63)  | <.001 | 0.48<br>(0.44-0.52) | 0.68<br>(0.63-0.74)        | 0.75<br>(0.70-0.81) | <.001               | .005 |             |                   |
| 100% fruit juice                                    | 0.60<br>(0.55-0.65)   | 0.56<br>(0.51-0.60)  | 0.46<br>(0.42-0.49)  | <.001 | 0.66<br>(0.62-0.70) | 0.57<br>(0.53-0.61)        | 0.52<br>(0.47-0.56) | <.001               | .51  |             |                   |
| Total vegetables, servings/d                        | 1.09<br>(1.04-1.15)   | 0.97<br>(0.92-1.01)  | 0.97<br>(0.93-1.01)  | <.001 | 1.01<br>(0.98-1.04) | 0.99<br>(0.96-1.02)        | 0.97<br>(0.94-1.00) | .08                 | .04  |             |                   |
| Dark-green vegetables                               | 0.03<br>(0.02-0.04)   | 0.04<br>(0.04-0.05)  | 0.05<br>(0.04-0.06)  | .02   | 0.04<br>(0.03-0.04) | 0.05<br>(0.04-0.06)        | 0.07<br>(0.06-0.08) | <.001               | .29  |             |                   |
| Tomatoes                                            | 0.28<br>(0.26-0.30)   | 0.23<br>(0.21-0.25)  | 0.24<br>(0.22-0.25)  | .003  | 0.27<br>(0.25-0.28) | 0.23<br>(0.22-0.25)        | 0.21<br>(0.20-0.22) | <.001               | .23  |             |                   |
| Other red/orange vegetables                         | 0.05<br>(0.04-0.06)   | 0.04<br>(0.03-0.05)  | 0.05<br>(0.04-0.06)  | .89   | 0.05<br>(0.04-0.06) | 0.06<br>(0.05-0.06)        | 0.07<br>(0.06-0.08) | <.001               | .02  |             |                   |
| White potatoes                                      | 0.38<br>(0.34-0.42)   | 0.32<br>(0.30-0.34)  | 0.29<br>(0.27-0.31)  | .001  | 0.33<br>(0.31-0.34) | 0.29<br>(0.27-0.31)        | 0.29<br>(0.27-0.31) | .01                 | .06  |             |                   |
| Other starchy (e.g., corn)                          | 0.07<br>(0.06-0.08)   | 0.06<br>(0.06-0.07)  | 0.06<br>(0.05-0.06)  | .12   | 0.06<br>(0.05-0.07) | 0.06<br>(0.06-0.07)        | 0.06<br>(0.05-0.06) | .62                 | .40  |             |                   |
| Other vegetables                                    | 0.27<br>(0.25-0.29)   | 0.25<br>(0.22-0.27)  | 0.25<br>(0.24-0.27)  | .41   | 0.27<br>(0.25-0.28) | 0.27<br>(0.25-0.29)        | 0.25<br>(0.23-0.27) | .12                 | .71  |             |                   |
| Vegetables excluding potatoes/starchy               | 0.63<br>(0.60-0.66)   | 0.56<br>(0.52-0.60)  | 0.60<br>(0.56-0.63)  | .18   | 0.62<br>(0.60-0.64) | 0.61<br>(0.58-0.64)        | 0.59<br>(0.57-0.62) | .11                 | .84  |             |                   |
| Total grains, servings/d                            |                       |                      |                      |       |                     |                            |                     |                     |      |             |                   |
| Whole grains                                        | 0.39<br>(0.34-0.43)   | 0.50<br>(0.47-0.53)  | 0.80<br>(0.76-0.84)  | <.001 | 0.53<br>(0.50-0.57) | 0.64<br>(0.59-0.69)        | 0.93<br>(0.87-0.98) | <.001               | .43  |             |                   |
| Refined grains                                      | 6.36<br>(6.18-6.53)   | 6.32<br>(6.21-6.42)  | 6.46<br>(6.35-6.58)  | .25   | 6.21<br>(6.11-6.32) | 6.08<br>(5.98-6.18)        | 6.09<br>(5.99-6.18) | .16                 | .06  |             |                   |
| Nuts and seeds, servings/d                          | 0.24<br>(0.20-0.29)   | 0.25<br>(0.21-0.28)  | 0.22<br>(0.20-0.25)  | .51   | 0.37<br>(0.32-0.41) | 0.41<br>(0.37-0.45)        | 0.46<br>(0.42-0.51) | .03                 | .03  |             |                   |
| Legumes, servings/d                                 | 0.08<br>(0.07-0.09)   | 0.08<br>(0.06-0.09)  | 0.09<br>(0.08-0.11)  | .12   | 0.05<br>(0.05-0.06) | 0.05<br>(0.05-0.06)        | 0.06<br>(0.06-0.07) | .22                 | .41  |             |                   |
| Total meat, serving/d                               |                       |                      |                      |       |                     |                            |                     |                     |      |             |                   |
| Processed meat                                      | 0.26<br>(0.23-0.28)   | 0.25<br>(0.24-0.27)  | 0.25<br>(0.24-0.27)  | .56   | 0.24<br>(0.22-0.26) | 0.25<br>(0.23-0.27)        | 0.27<br>(0.25-0.29) | .046                | .06  |             |                   |
| Unprocessed red meat                                | 0.38<br>(0.34-0.42)   | 0.35<br>(0.33-0.37)  | 0.35<br>(0.33-0.37)  | .17   | 0.34<br>(0.32-0.36) | 0.33<br>(0.30-0.35)        | 0.29<br>(0.27-0.31) | .002                | .29  |             |                   |
| Poultry                                             | 0.32<br>(0.29-0.36)   | 0.41<br>(0.38-0.43)  | 0.40<br>(0.37-0.42)  | .002  | 0.29<br>(0.27-0.31) | 0.36<br>(0.33-0.38)        | 0.35<br>(0.32-0.38) | .001                | .87  |             |                   |
| Fish and Shellfish                                  | 0.06<br>(0.05-0.08)   | 0.07<br>(0.06-0.08)  | 0.08<br>(0.06-0.10)  | .27   | 0.06<br>(0.05-0.07) | 0.06<br>(0.05-0.08)        | 0.07<br>(0.05-0.08) | .82                 | .82  |             |                   |
| High in omega-3 fatty acids <sup>b</sup>            | 0.01<br>(0.009-0.01)  | 0.01<br>(0.007-0.01) | 0.01<br>(0.008-0.01) | .96   | 0.01<br>(0.01-0.02) | 0.02<br>(0.01-0.02)        | 0.02<br>(0.01-0.02) | .47                 | .62  |             |                   |
| Low in omega-3 fatty acids <sup>b</sup>             | 0.05<br>(0.04-0.06)   | 0.06<br>(0.05-0.07)  | 0.07<br>(0.05-0.09)  | .13   | 0.05<br>(0.04-0.06) | 0.05<br>(0.04-0.06)        | 0.05<br>(0.04-0.06) | .94                 | .21  |             |                   |
| Eggs, servings/d                                    | 0.30<br>(0.26-0.34)   | 0.35<br>(0.32-0.39)  | 0.35<br>(0.33-0.37)  | .05   | 0.27<br>(0.25-0.29) | 0.37<br>(0.34-0.39)        | 0.38<br>(0.36-0.40) | <.001               | .02  |             |                   |
| Total dairy, servings/d                             | 2.03<br>(1.93-2.13)   | 2.15<br>(2.08-2.21)  | 2.20<br>(2.12-2.29)  | .009  | 2.18<br>(2.10-2.25) | 2.30<br>(2.25-2.36)        | 2.28<br>(2.20-2.37) | .05                 | .36  |             |                   |
| Milk                                                | 1.41<br>(1.32-1.50)   | 1.37<br>(1.31-1.43)  | 1.26<br>(1.19-1.34)  | .01   | 1.46<br>(1.40-1.52) | 1.46<br>(1.41-1.51)        | 1.29<br>(1.23-1.36) | <.001               | .71  |             |                   |
| Cheese                                              | 0.57<br>(0.54-0.61)   | 0.67<br>(0.64-0.70)  | 0.82<br>(0.78-0.86)  | <.001 | 0.62<br>(0.58-0.65) | 0.70<br>(0.68-0.73)        | 0.80<br>(0.76-0.84) | <.001               | .08  |             |                   |
| Yogurt                                              | 0.02<br>(0.01-0.02)   | 0.03<br>(0.02-0.03)  | 0.04<br>(0.04-0.05)  | <.001 | 0.05<br>(0.04-0.06) | 0.05<br>(0.05-0.06)        | 0.08<br>(0.07-0.09) | <.001               | .26  |             |                   |
| Sugar-sweetened beverages <sup>c</sup> , servings/d | 1.86<br>(1.73-2.00)   | 1.55<br>(1.45-1.64)  | 1.30<br>(1.21-1.40)  | <.001 | 1.92<br>(1.82-2.02) | 1.45<br>(1.37-1.54)        | 1.10<br>(1.03-1.18) | <.001               | .01  |             |                   |
| Added sugar, g/d                                    | 96.2<br>(92.4-100)    | 86.1<br>(83.2-88.6)  | 77.3<br>(74.8-79.4)  | <.001 | 98.7<br>(95.8-102)  | 83.6<br>(81.5-85.7)        | 74.8<br>(73.1-76.4) | <.001               | .04  |             |                   |
| Macronutrients                                      |                       |                      |                      |       |                     |                            |                     |                     |      |             |                   |
| Total fat, %Energy (E)                              | 32.9<br>(32.4-33.4)   | 33.1<br>(32.8-33.5)  | 33.5<br>(33.2-33.8)  | .05   | 32.1<br>(31.8-32.5) | 32.8<br>(32.5-33.0)        | 33.3<br>(33.0-33.7) | <.001               | .12  |             |                   |
| Saturated fat, %E                                   | 11.6<br>(11.4-11.8)   | 11.6<br>(11.4-11.7)  | 11.6<br>(11.5-11.8)  | .80   | 11.4<br>(11.2-11.6) | 11.6<br>(11.5-11.7)        | 11.6<br>(11.5-11.8) | .04                 | .19  |             |                   |
| Monounsaturated fat, %E                             | 14.4<br>(13.9-15.0)   | 14.4<br>(14.1-14.8)  | 14.0<br>(13.6-14.5)  | .25   | 14.1<br>(13.8-14.5) | 14.2<br>(13.9-14.5)        | 14.2<br>(13.9-14.5) | .68                 | .19  |             |                   |

|                           |                     |                     |                     |       |                     |                     |                     |       |     |
|---------------------------|---------------------|---------------------|---------------------|-------|---------------------|---------------------|---------------------|-------|-----|
| Polyunsaturated fat, %E   | 6.29<br>(6.14-6.44) | 6.73<br>(6.61-6.85) | 7.50<br>(7.39-7.61) | <.001 | 6.14<br>(6.04-6.24) | 6.54<br>(6.44-6.64) | 7.39<br>(7.27-7.50) | <.001 | .73 |
| Seafood omega-3 fat, mg/d | 58.6<br>(50.3-66.8) | 57.5<br>(49.0-65.9) | 45.2<br>(34.8-55.6) | .04   | 53.3<br>(47.3-59.4) | 57.7<br>(48.3-67.1) | 43.5<br>(38.4-48.7) | .02   | .55 |
| Plant omega-3 fat, mg/d   | 120<br>(117-123)    | 120<br>(118-123)    | 147<br>(143-150)    | <.001 | 117<br>(114-119)    | 120<br>(118-123)    | 143<br>(141-146)    | <.001 | .78 |
| Protein, %E               | 13.9<br>(13.6-14.2) | 14.6<br>(14.4-14.8) | 14.9<br>(14.8-15.1) | <.001 | 13.8<br>(13.6-13.9) | 14.6<br>(14.4-14.7) | 14.8<br>(14.6-15.0) | <.001 | .95 |
| Carbohydrate, %E          | 54.3<br>(53.8-54.8) | 53.3<br>(52.9-53.8) | 52.7<br>(52.3-53.0) | <.001 | 55.0<br>(54.6-55.5) | 53.7<br>(53.3-54.0) | 53.0<br>(52.6-53.4) | <.001 | .37 |
| Other nutrients           |                     |                     |                     |       |                     |                     |                     |       |     |
| Sodium, mg/d              | 3229<br>(3158-3301) | 3305<br>(3271-3338) | 3372<br>(3325-3419) | .006  | 3143<br>(3111-3174) | 3285<br>(3249-3322) | 3287<br>(3231-3343) | <.001 | .69 |
| Cholesterol, mg/d         | 236<br>(226-246)    | 243<br>(233-253)    | 246<br>(240-253)    | .08   | 219<br>(214-223)    | 233<br>(226-239)    | 241<br>(235-248)    | <.001 | .07 |
| Fiber, g/d                | 12.6<br>(12.2-13.0) | 13.5<br>(13.3-13.8) | 15.2<br>(14.9-15.5) | <.001 | 12.4<br>(12.1-12.6) | 13.9<br>(13.6-14.1) | 15.4<br>(15.1-15.6) | <.001 | .15 |
| Potassium, mg/d           | 2252<br>(2199-2305) | 2248<br>(2214-2281) | 2303<br>(2268-2338) | .09   | 2260<br>(2222-2299) | 2317<br>(2288-2346) | 2352<br>(2322-2382) | <.001 | .31 |
| Calcium, mg/d             | 903<br>(875-932)    | 1012<br>(991-1034)  | 1065<br>(1042-1087) | <.001 | 961<br>(937-984)    | 1074<br>(1056-1092) | 1102<br>(1075-1130) | <.001 | .44 |

Abbreviation: NHANES, National Health and Nutrition Examination Survey.

<sup>a</sup> Data were weighted to be nationally representative. All analyses (except for macronutrients) were energy-adjusted to 2000 kcal/d using the residual method. Macronutrients were reported as % of total energy.

<sup>b</sup> Cooked fish and shellfish containing 500 mg or more of omega-3 fatty acids (EPA and DHA) per 3 ounces were included in the high omega-3 fatty acids category.

<sup>c</sup> Serving of sugar-sweetened beverage defined as 8 fl oz or 237 grams. Sugar-sweetened beverages include soft drinks, fruit drinks, sports drinks, presweetened teas and energy drinks with more than 50 kcal per 8 fl oz.

<sup>d</sup> *P* for trend was estimated by treating survey-cycle as a continuous variable in a survey-weighted linear regression model. *P* for interaction was calculated using the Wald F test for an interaction term between survey-cycle and the indicator variable (participation of NSLP/SBP).

**eFigure 1.** Trends in Estimated Mean Consumption of Nuts/Seeds and Legumes (Panel A), Sodium and Potassium (Panel B), and Dietary Fat (Panel C) Among US Children Based on NHANES Data From 1999-2016

Data were weighted to be nationally representative. Values in Panels A-B are energy-adjusted to 2000 kcal/d using the residual method. PUFA=polyunsaturated fatty acid, MUFA=monounsaturated fatty acid, SFA=saturated fatty acid.

**A.**

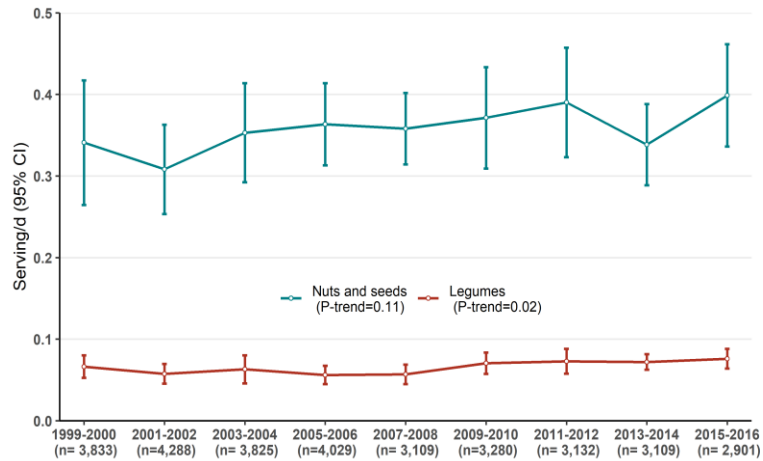

**B.**

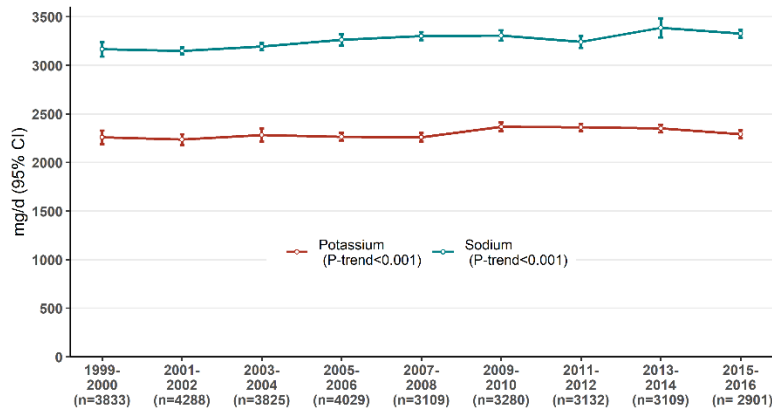

**C.**

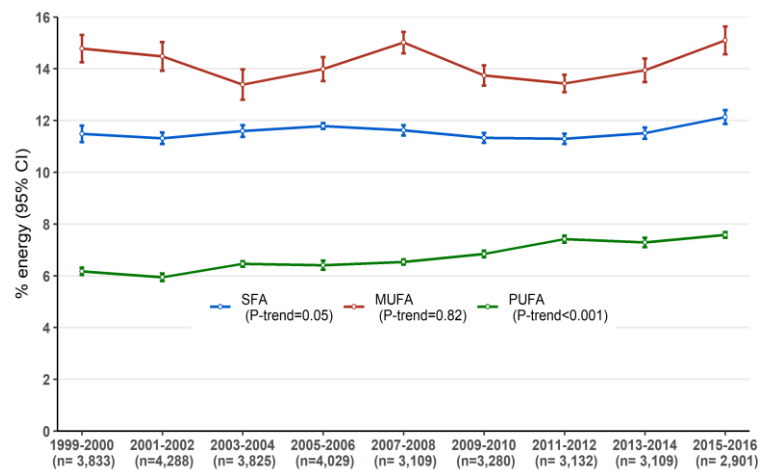

**eFigure 2.** Trends in Estimated Mean Consumption of Sugar-Sweetened Beverages (Panel A), Refined Grain (Panel B), White Potato (Panel C), Processed Meat (Panel D), Sodium (Panel E), and Fruit Juice (Panel F) by Age, Sex, and Race/Ethnicity Among US Children Based on NHANES Data From 1999-2016

Data were weighted to be nationally representative. Values in Panels A-F were energy-adjusted to 2000 kcal/d using the residual method.

**A. Sugar-sweetened beverages**

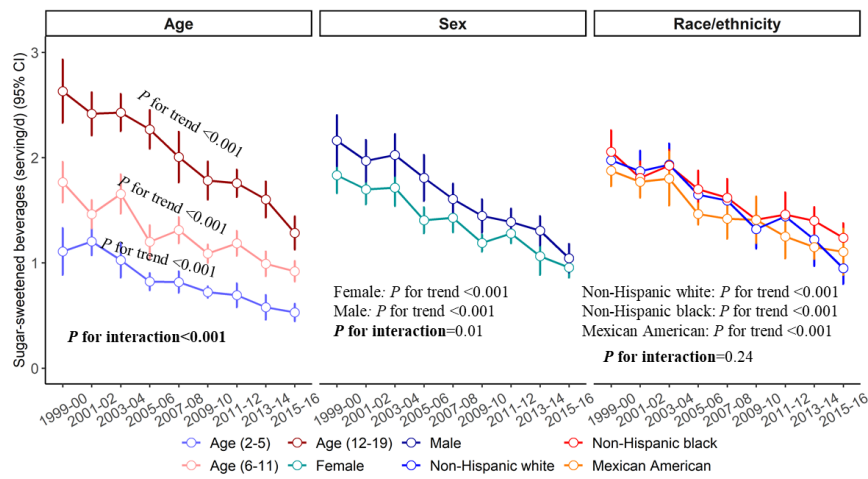

**B. Refined grains**

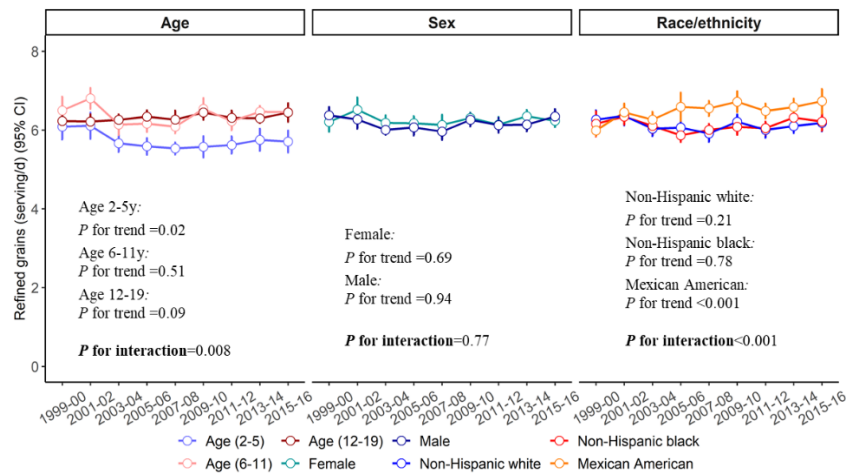

**C. White potato**

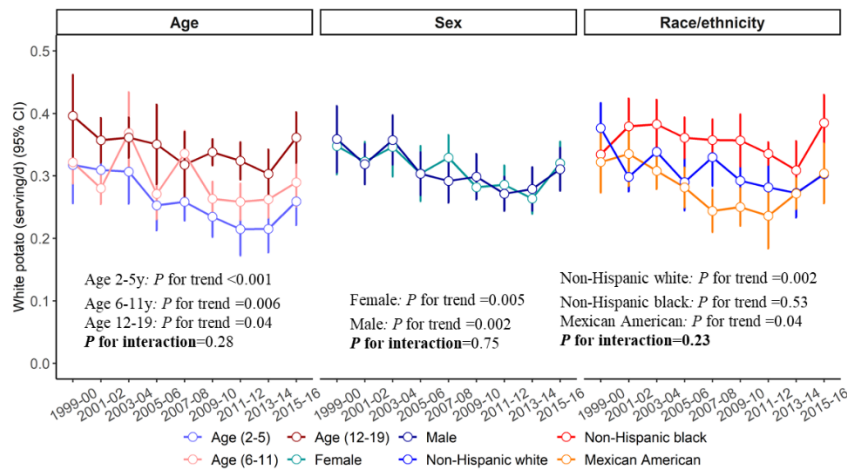

## D. Processed meat

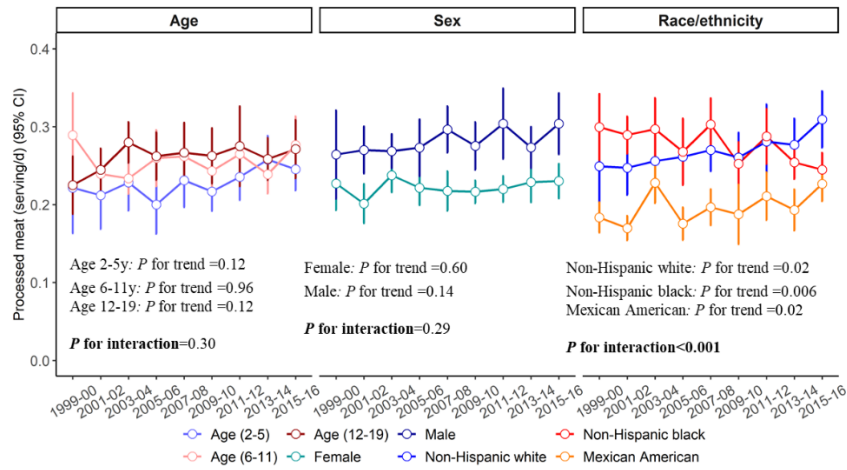

## E. Sodium

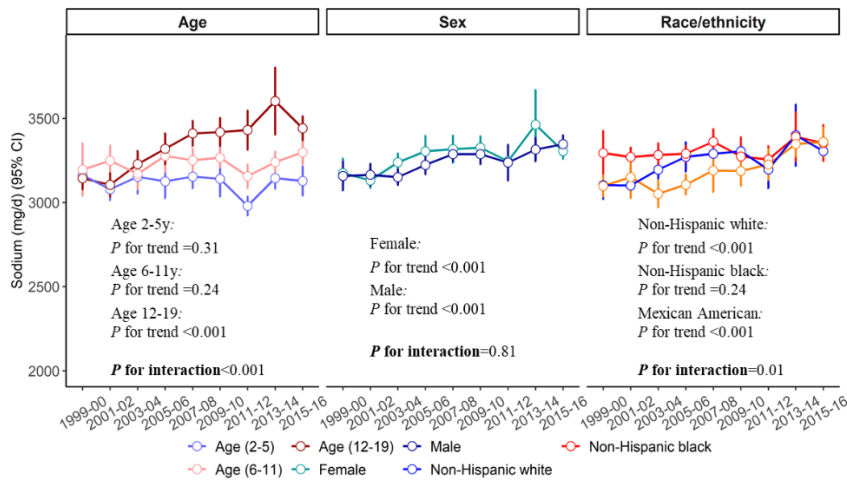

## F. Fruit juice

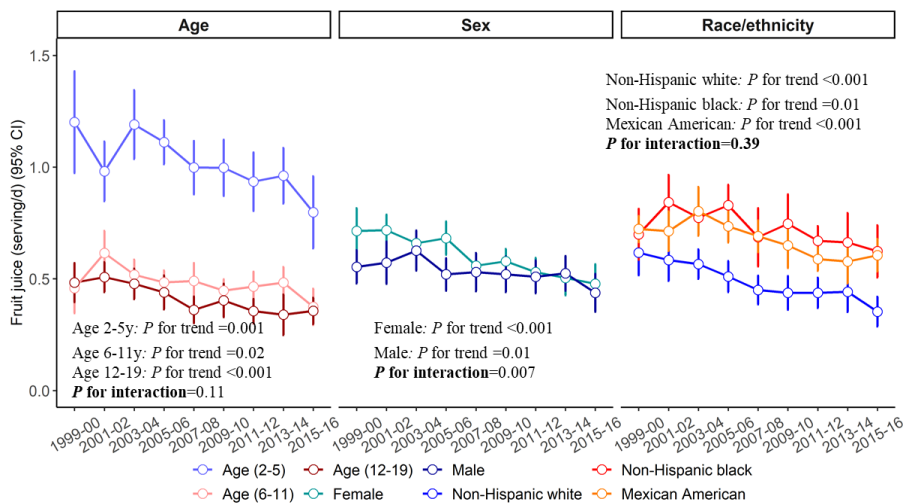

**eFigure 3.** Trends in Estimated Mean Consumption of Whole Grains (Panel A), Nuts/Seeds (Panel B), Whole Fruits (Panel C), and Seafoods (Panel D) by Age, Sex, and Race/ethnicity Among US Children Based on NHANES Data From 1999-2016

Data were weighted to be nationally representative. Values in Panels A-D were energy-adjusted to 2000 kcal/d using the residual method.

**A. Whole grains**

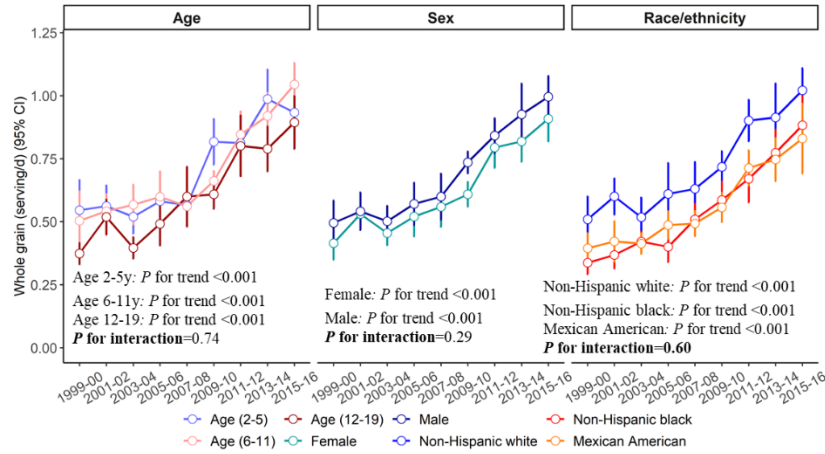

**B. Nuts/seeds**

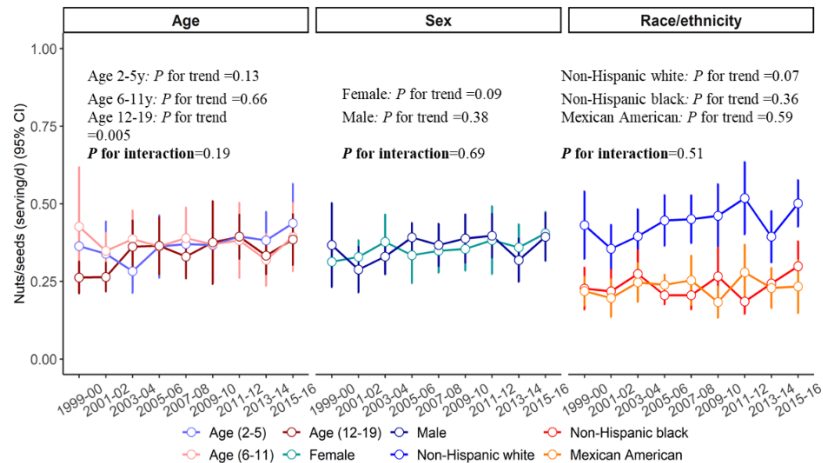

**C. Whole fruits**

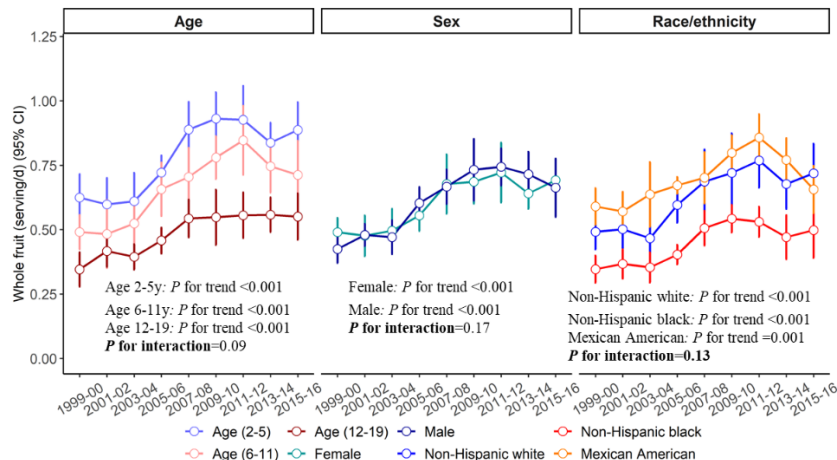



## D. Seafoods

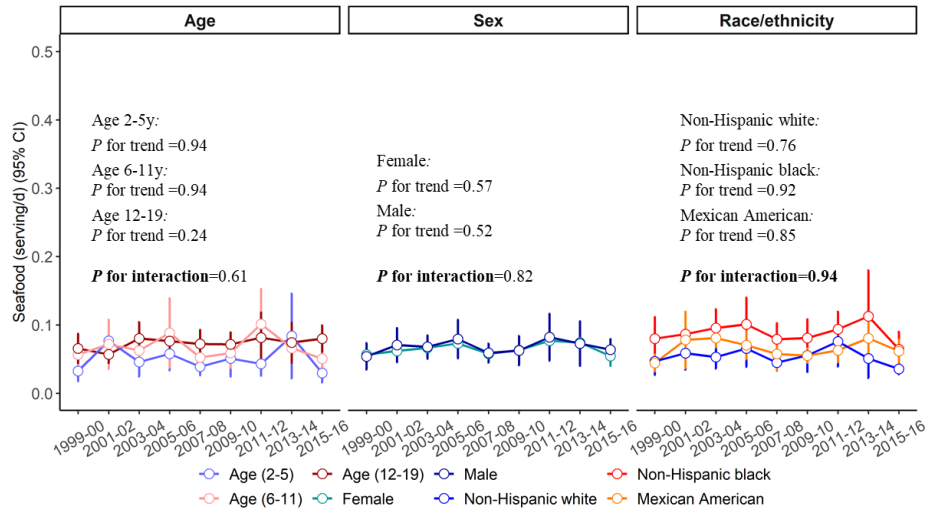

**eFigure 4.** Trends in Estimated Mean Consumption of Sugar-Sweetened Beverages (Panel A), Refined Grains (Panel B), White Potato (Panel C), Processed Meat (Panel D), Sodium (Panel E), and Fruit Juice (Panel F) by Parental Education Level, Household Income Level, and Household Food Security Level Among US Children Based on NHANES Data From 1999-2016

Data were weighted to be nationally representative. Values in Panels A-F were energy-adjusted to 2000 kcal/d using the residual method.

**A. Sugar-sweetened beverages**

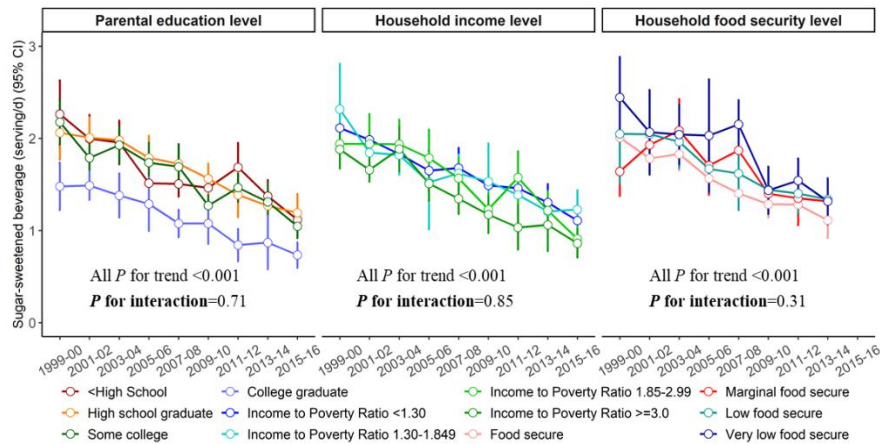

**B. Refined grains**

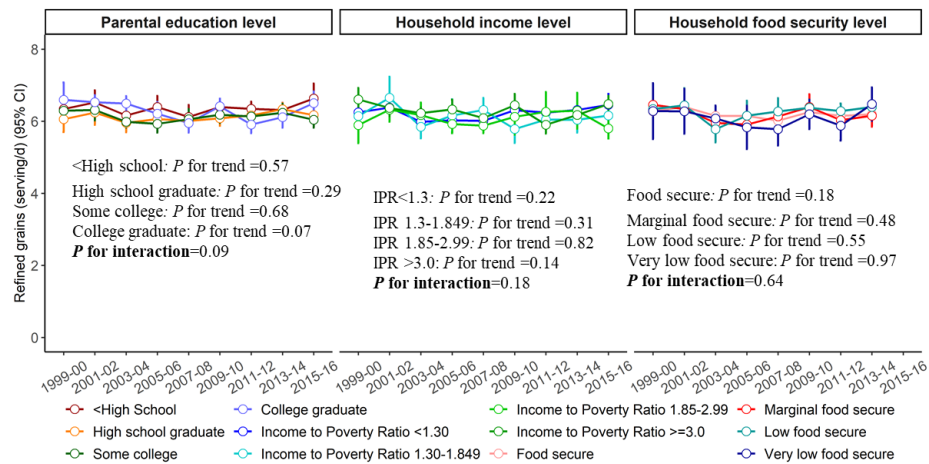

**C. White potato**

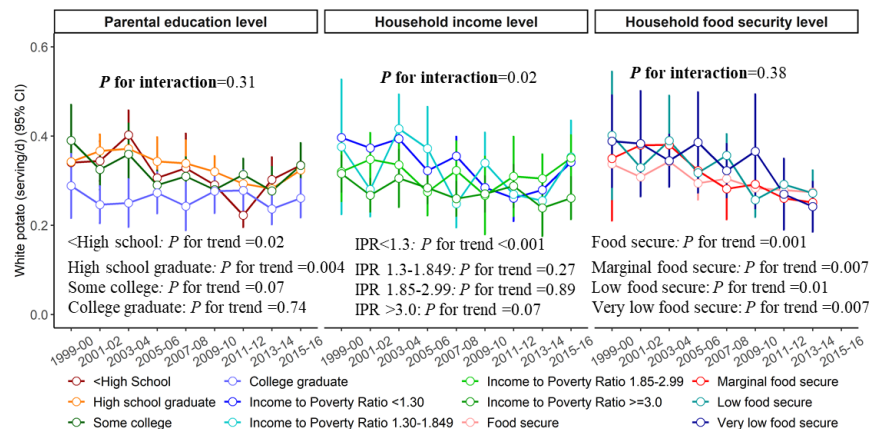

## D. Processed meat

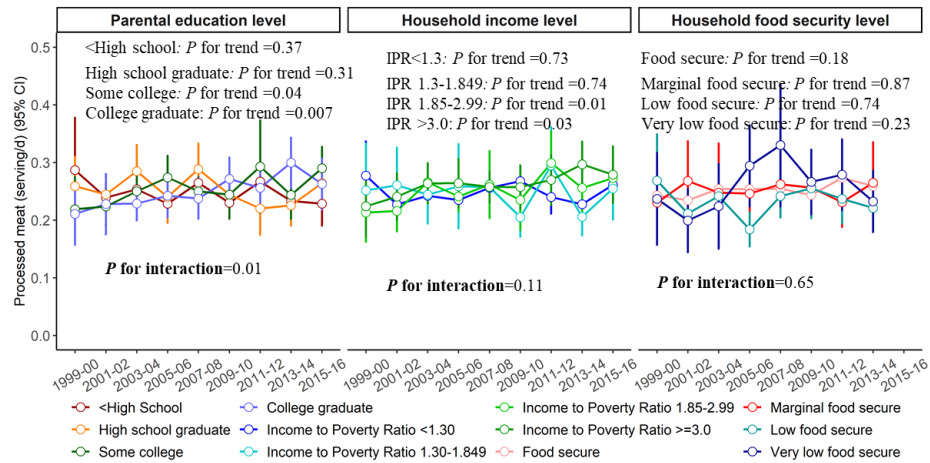

## E. Sodium

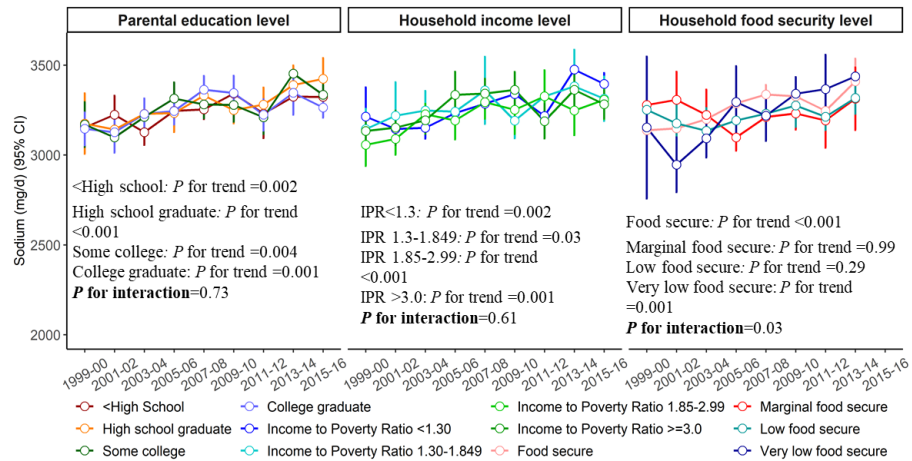

## F. Fruit juice

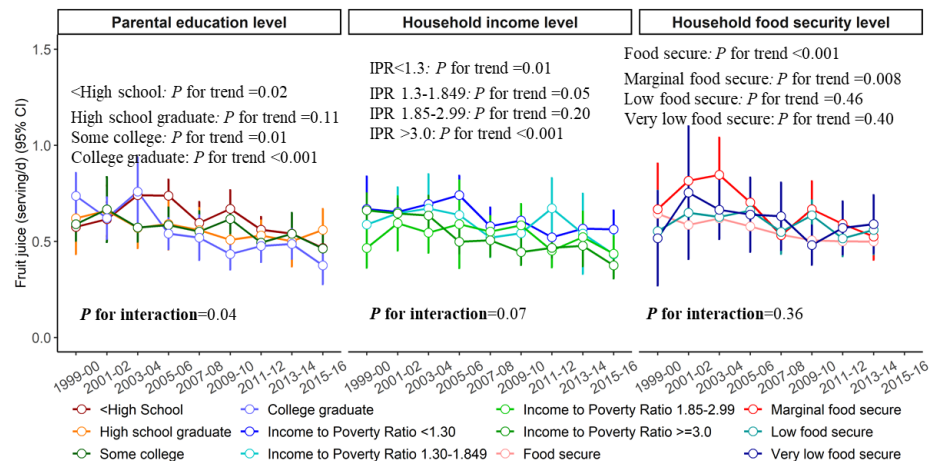

**eFigure 5.** Trends in Estimated Mean Consumption of Whole Grains (Panel A), Nuts/Seeds (Panel B), Whole Fruits (Panel C), and Seafoods (Panel D) by Parental Education Level, Household Income Level, and Household Food Security Level Among US Children Based on NHANES Data From 1999-2016

Data were weighted to be nationally representative. Values in Panels A-D were energy-adjusted to 2000 kcal/d using the residual method.

**A. Whole grains**

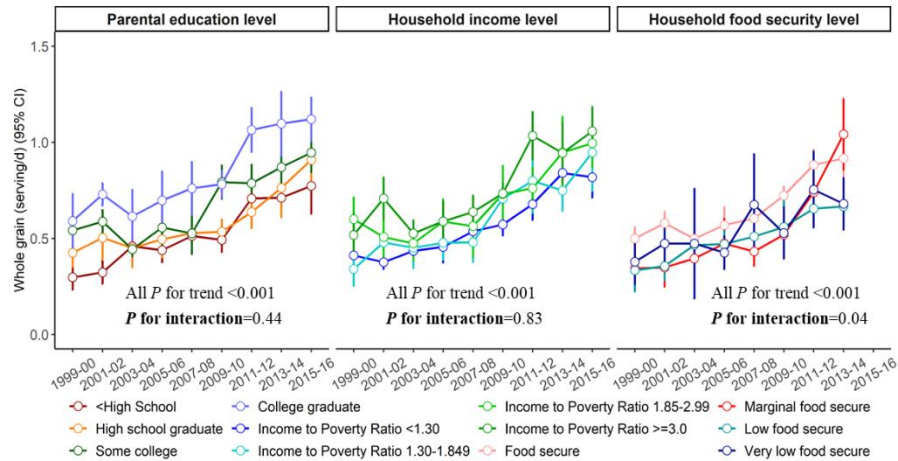

**B. Nuts/seeds**

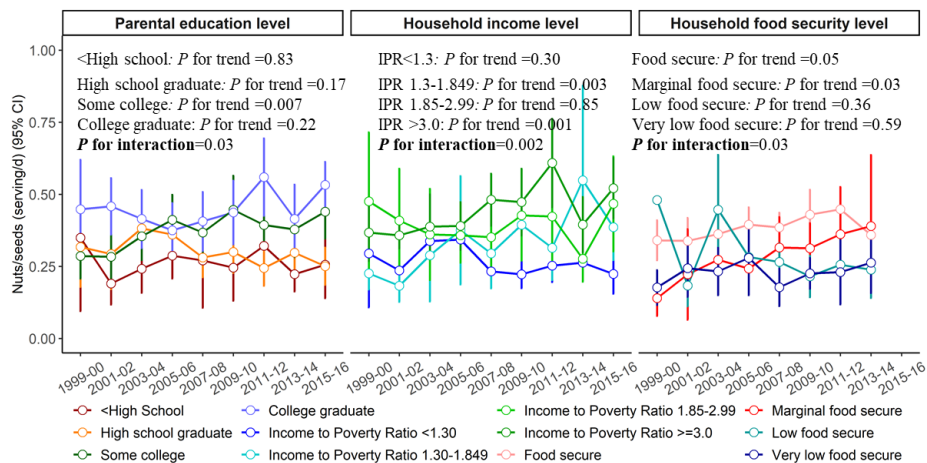

**C. Whole fruits**

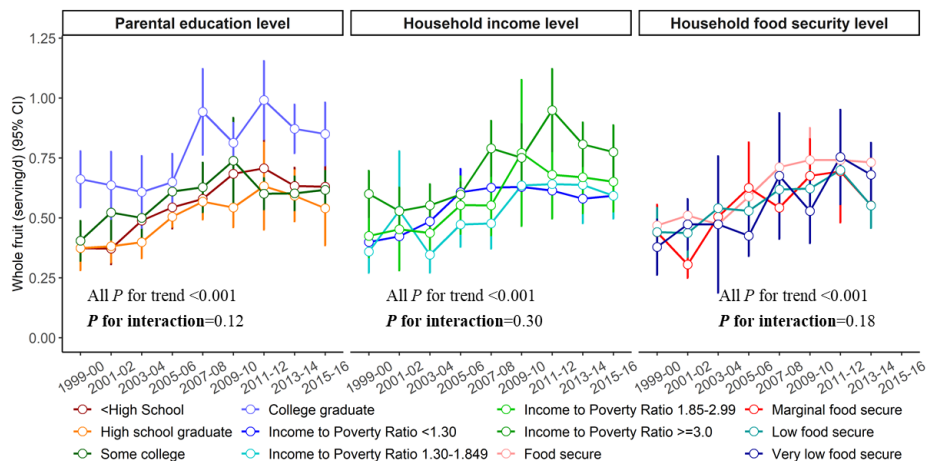

## D. Seafoods

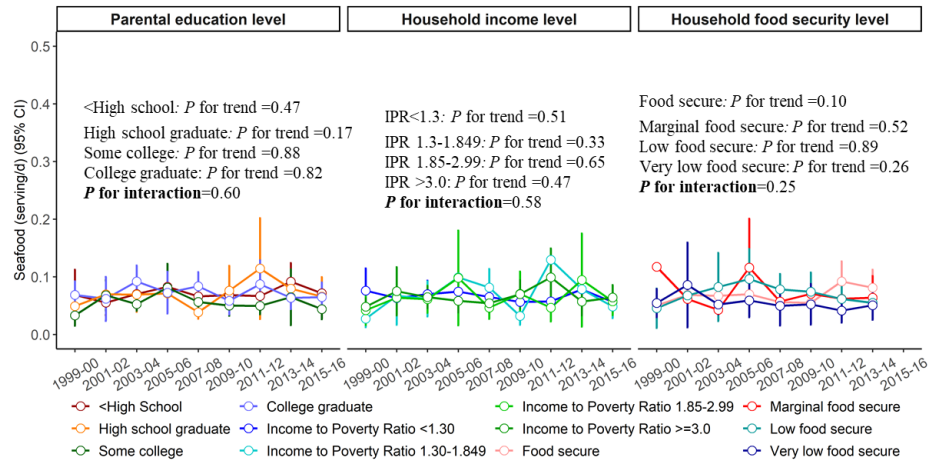

**eFigure 6.** Trends in Estimated Mean Consumption of Sugar-Sweetened Beverages (Panel A), Refined Grains (Panel B), White Potato (Panel C), Processed Meat (Panel D), Sodium (Panel E), and Fruit Juice (Panel F) by Participation of Women, Infants, and Children (WIC), Supplemental Nutrition Assistance Program (SNAP), and National School Lunch/Breakfast Program Among US Children Based on NHANES Data From 1999-2016

Data were weighted to be nationally representative. Values in Panels A-F were energy-adjusted to 2000 kcal/d using the residual method.

**A. Sugar-sweetened beverages**

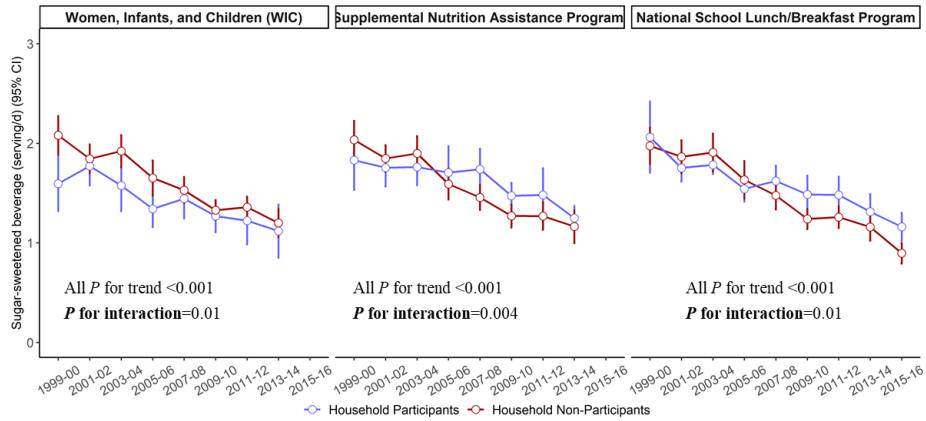

**B. Refined grain**

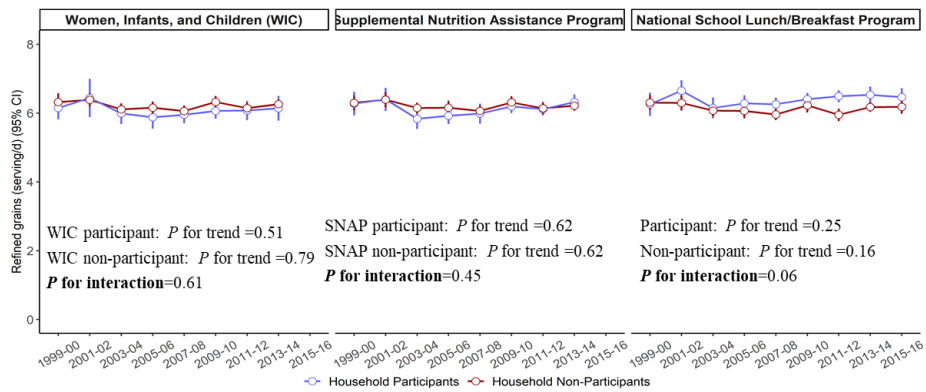

**C. White potato**

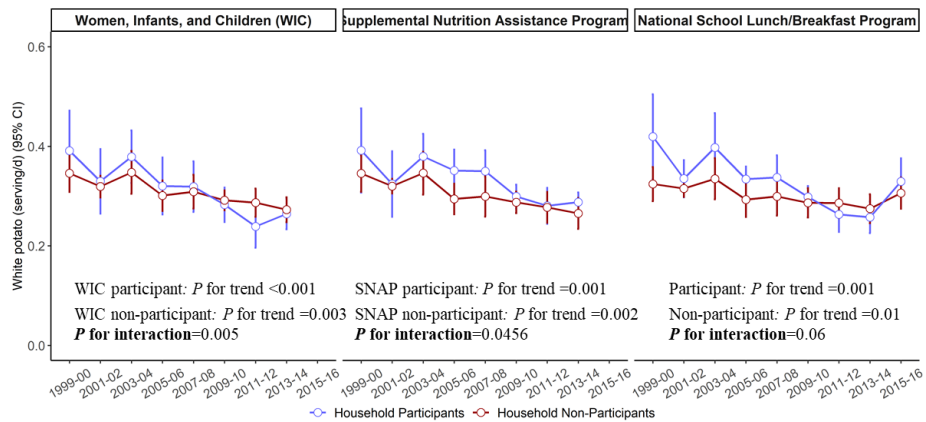

## D. Processed meat

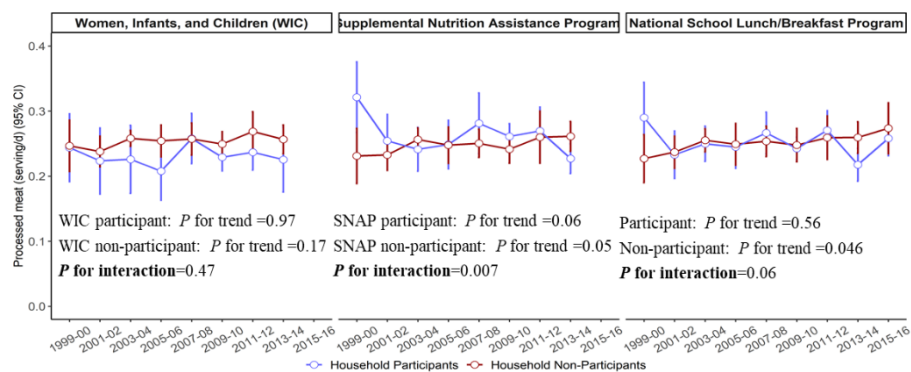

## E. Sodium

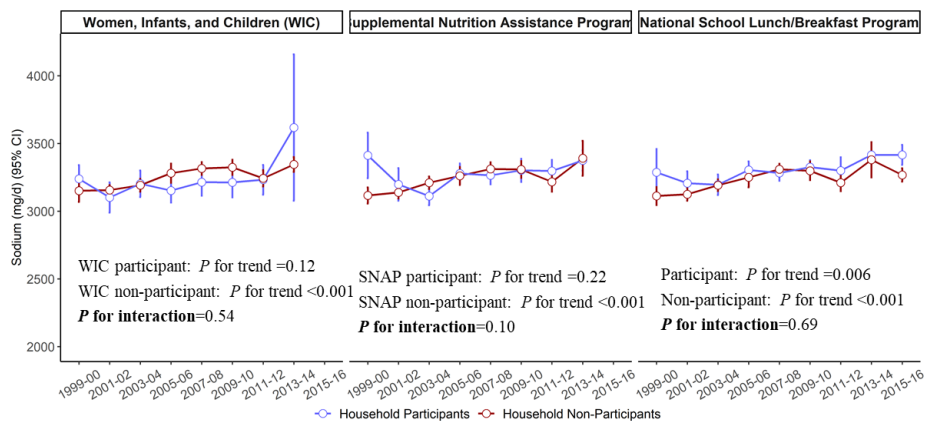

## F. Fruit juice

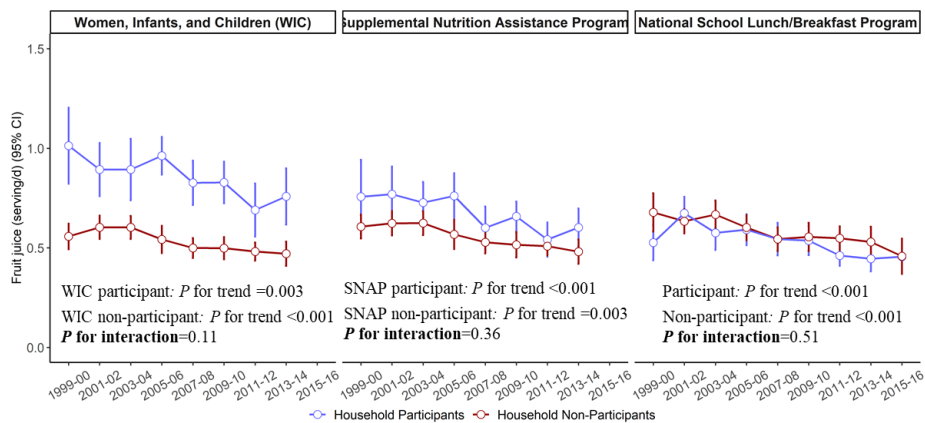



**eFigure 7.** Trends in Estimated Mean Consumption of Whole Grains (Panel A), Nuts/Seeds (Panel B), Whole Fruits (Panel C), and Seafoods (Panel D) by Participation of Women, Infants, and Children (WIC), Supplemental Nutrition Assistance Program (SNAP), and National School Lunch/Breakfast Program Among US Children Based on NHANES Data From 1999-2016

Data were weighted to be nationally representative. Values in Panels A-D were energy-adjusted to 2000 kcal/d using the residual method.

**A. Whole grains**

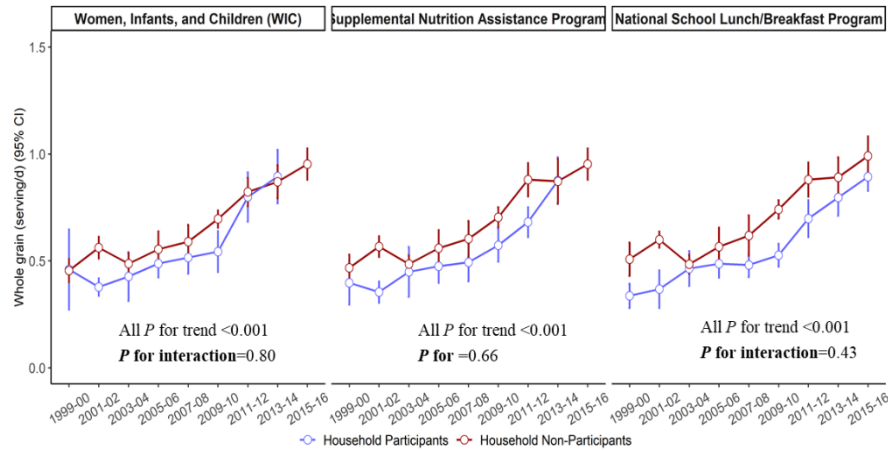

**B. Nuts/seeds**

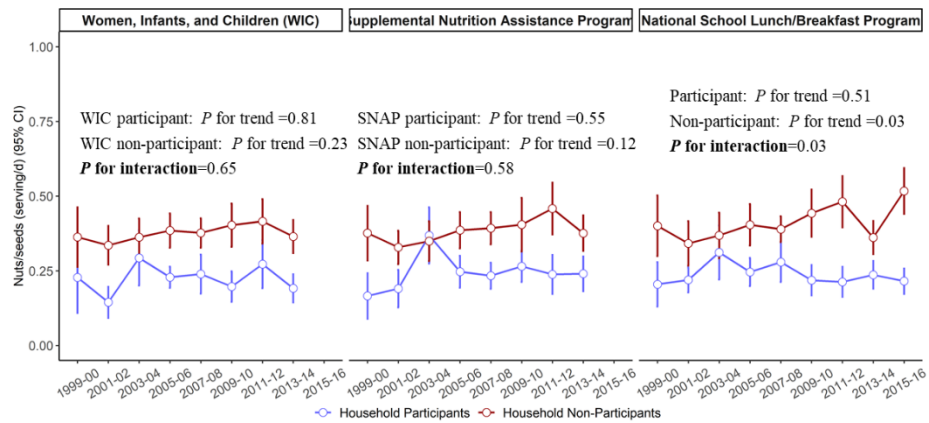

**C. Whole fruits**

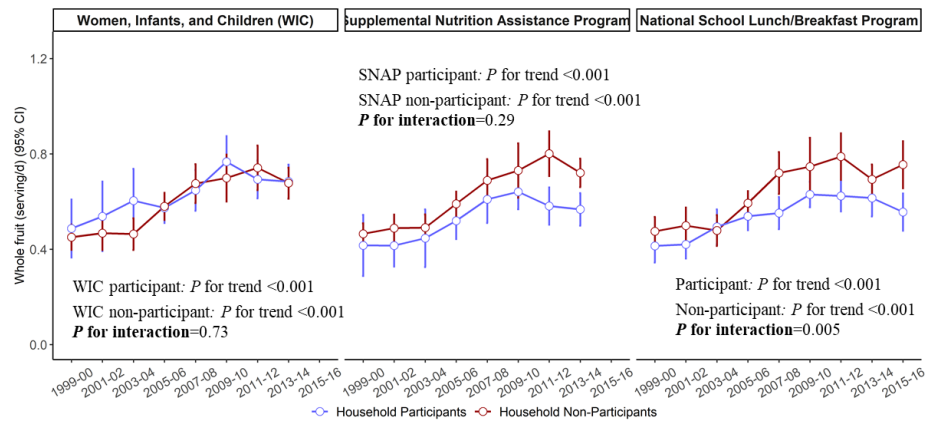



## D. Seafoods

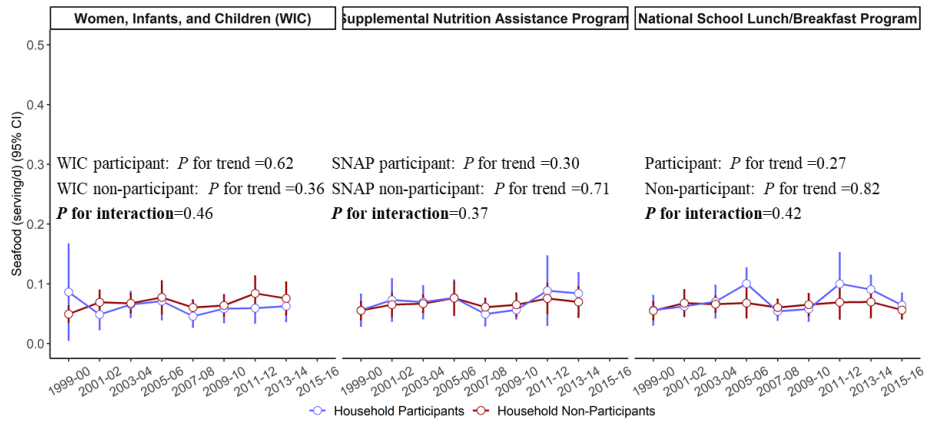

## eReferences

1. Mozaffarian D, Benjamin EJ, Go AS, et al. Heart disease and stroke statistics--2015 update: a report from the American Heart Association. *Circulation*. 2015;131(4):e29-322.
2. Rehm CD, Penalvo JL, Afshin A, Mozaffarian D. Dietary Intake Among US Adults, 1999-2012. *JAMA*. 2016;315(23):2542-2553.
3. U.S. Department of Agriculture Food and Nutrition Service. Healthy Eating Index (HEI). Available at, <https://www.fns.usda.gov/resource/healthy-eating-index-hei>. Accessed on May 19, 2019.
4. National Cancer Institute. Division of Cancer Control and Population Sciences. Simple HEI scoring algorithm. Available at, <https://epi.grants.cancer.gov/he/hei-scoring-method.html>. Accessed on May 20, 2019.
5. National Cancer Institute. Division of Cancer Control and Population Sciences. Population Ratio Method. Available at, <https://epi.grants.cancer.gov/he/population-ratio-method.html>. Accessed on May 20, 2019.
6. Tooze JA, Midthune D, Dodd KW, et al. A new statistical method for estimating the usual intake of episodically consumed foods with application to their distribution. *J Am Diet Assoc*. 2006;106(10):1575-1587.
7. Zhang S, Midthune D, Guenther PM, et al. A New Multivariate Measurement Error Model with Zero-Inflated Dietary Data, and Its Application to Dietary Assessment. *Ann Appl Stat*. 2011;5(2B):1456-1487.
